# Supplementary material for: Selective C3-nitrosation of imidazopyridines using AgNO3 as the NO source
Source: Royal Society of Chemistry journal article supplement (doi:10.1039/d2nj02115c), 2022-01-01
Supplement: d2nj02115c1.pdf [file d2nj02115c1.pdf]

# Supporting Information

For

## Selective C<sub>3</sub> Nitrosation of Imidazopyridines using AgNO<sub>3</sub> as the NO source

Vishal Suresh Kudale,<sup>a</sup> Ching-Piao Chu<sup>a</sup> and Jeh-Jeng Wang\*<sup>ab</sup>

<sup>a</sup> Department of Medicinal and Applied Chemistry, Kaohsiung Medical University, No. 100, Shiquan 1st Rd, Sanmin District, Kaohsiung City, 807, Taiwan.

<sup>b</sup> Department of Medical Research, Kaohsiung Medical University Hospital, No. 100 Tzyou 1st Rd, Sanmin District, Kaohsiung City 807, Taiwan.

*Electronic Supplementary Information (ESI) available: [details of any supplementary information available should be included here]. See DOI: 10.1039/x0xx00000x*

## Table of Contents

|                                             |         |
|---------------------------------------------|---------|
| 1) General Information                      | S3      |
| 2) Mechanistic studies                      | S3      |
| 2) Experimental Procedures                  | S4- S5  |
| 3) Spectral Characterization                | S6-S16  |
| 4) References                               | S17-S17 |
| 5) Copies of $^1\text{H}$ & $^{13}\text{C}$ | S18-S43 |
| 6) X-Ray crystallographic data              | S44-S50 |

## (1) General Information

$^1\text{H}$ ,  $^{13}\text{C}$ , and DEPT NMR spectra were recorded on a 400 MHz Varian Unity Plus or Varian Mercury plus spectrometer. The chemical shift ( $\delta$ ) values are reported in parts per million (ppm), and the coupling constants (J) are given in Hz. The spectra were recorded using  $\text{CDCl}_3$  as a solvent.  $^1\text{H}$  NMR chemical shifts are referenced to tetramethylsilane (TMS) (0 ppm).  $^{13}\text{C}$  NMR was referenced to  $\text{CDCl}_3$  (77.0 ppm) or  $\text{DMSO-d}_6$  (39.51 ppm). The abbreviations used are as follows: s, singlet; d, doublet; t, triplet; q, quartet; dd, doublet of doublet; ddd, doublet of doublet; dt, doublet of triplets; td, triplet of doublet; m, multiplet. Mass spectra and high-resolution mass spectra (HRMS) were measured using the ESI (FT-MS solariX) at National Sun Yat-Sen University, Kaohsiung, Taiwan. Melting points were determined on an EZ-Melt (Automated melting point apparatus). All products reported showed  $^1\text{H}$  NMR spectra in agreement with the assigned structures. Reaction progress and product mixtures were routinely monitored by TLC using Merck TLC aluminum sheets (silica gel 60 F254). Column chromatography was carried out with 230–400 mesh silica gel 60 (Merck) and a mixture of hexane/ethyl acetate or hexane as eluent. Preparative TLC was run on Merck TLC aluminum sheets (silica gel 60 F254).

## (2) Mechanistic studies:

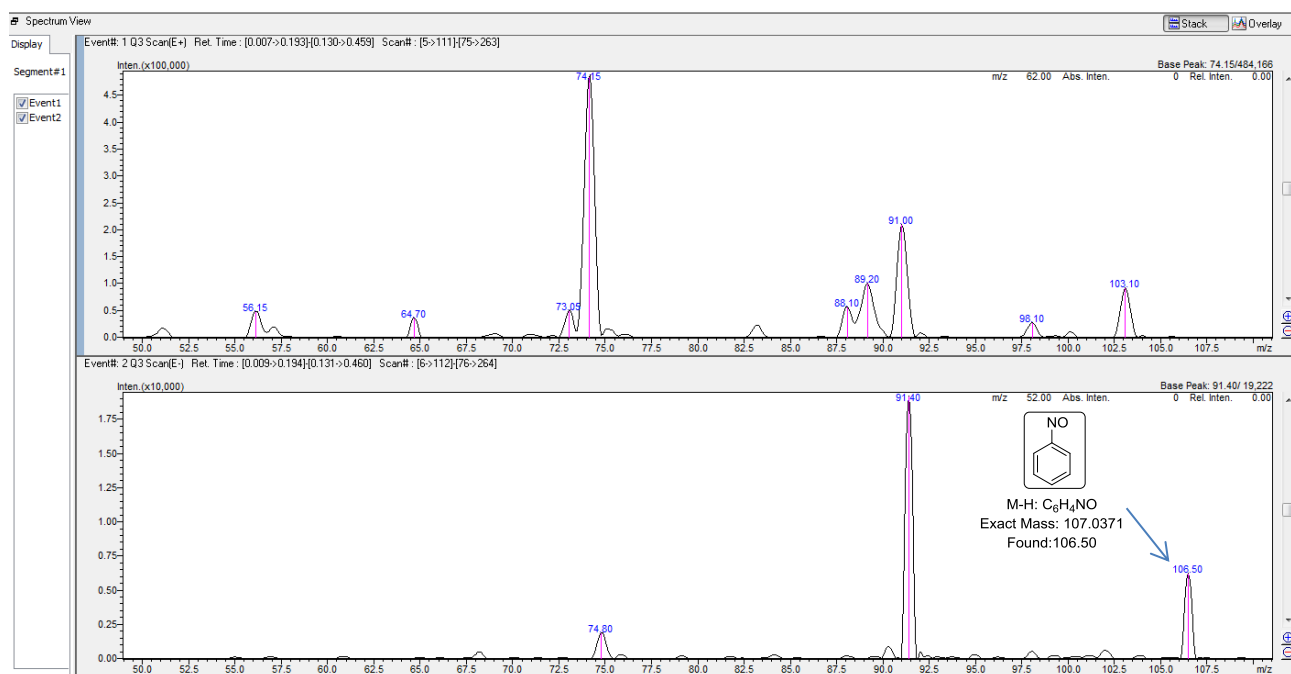

**Fig S1:** LC-MS observed trapping intermediate of 1, 4-Cyclohexadiene (1, 4-CHD) in the presence of starting material (1a).

### (3) Experimental Procedures

#### (i) The General Experimental Procedure for the Synthesis of 3-nitroso-2-phenylimidazo [1, 2-*a*] pyridine derivatives using AgNO<sub>3</sub> as the "NO" Source.

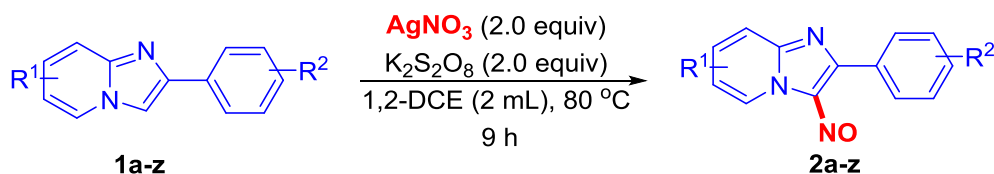

To an oven-dried sealed tube was charged with 2-phenylimidazo[1, 2-*a*]pyridine derivatives **1a-1z**<sup>1</sup> (0.2 mmol), AgNO<sub>3</sub> (2.0 equiv), K<sub>2</sub>S<sub>2</sub>O<sub>8</sub> (2.0 equiv) and 1, 2-Dichloroethane (1.0 mL) allowed to stir at 80 °C until the completion of the reaction (7 ~ 9 h) by TLC. After completion, the reaction mixture was cooled to room temperature and diluted with 20 mL of water. The water layer was extracted with (3X10 mL) of ethyl acetate, and the combined ethyl acetate layer was given brine wash (1X20 mL). The final ethyl acetate layer was dried over sodium sulfate and concentrated under reduced pressure to get the crude compound. The obtained crude was purified using column chromatography by eluting from (Hex/EA = 8/2) to afford pure heteroaryl nitrosation **2a-2z** in 65-90% yields.

#### (ii) The General Experimental Procedure for the Gram Scale Synthesis of 3-nitroso-2-phenylimidazo[1, 2-*a*] pyridine derivatives using AgNO<sub>3</sub> as the "NO" Source.

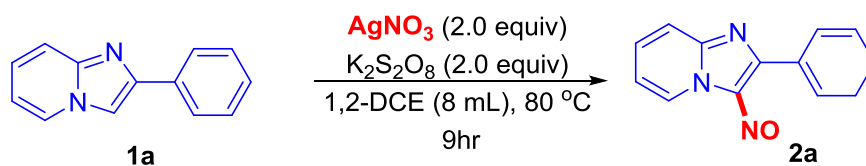

To an oven-dried sealed tube was charged with 2-phenylimidazo[1, 2-*a*]pyridine derivatives **1a** (5.15 mmol), AgNO<sub>3</sub> (2.0 equiv), K<sub>2</sub>S<sub>2</sub>O<sub>8</sub> (2.0 equiv) and 1, 2-Dichloroethane (8.0 mL) allowed to stir at 80 °C until the completion of the reaction (9 h) by TLC. After completion, the reaction mixture was cooled to room temperature and diluted with 30 mL of water. The water layer was extracted with (3X20 mL) of ethyl acetate, and the combined ethyl acetate layer was given brine wash (1X30 mL). The final ethyl acetate layer was dried over sodium sulfate and concentrated under reduced pressure to get the crude compound. The obtained crude was purified using column chromatography by eluting from (Hex/EA = 8/2) to afford pure heteroaryl nitrosation **2a** in 56% yields.

**(iii) The General Experimental Procedure Sequential one-spot strategy for the synthesis of 3-nitroso-2-phenylimidazo[1, 2-*a*] pyridine derivatives using AgNO<sub>3</sub> as the "NO" Source.**

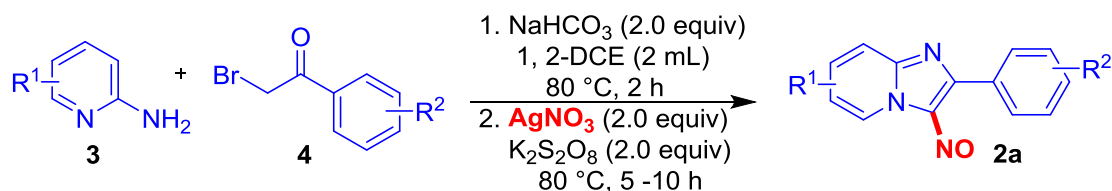

To an oven-dried sealed tube was charged with 2-aminopyridine derivatives **3** (0.2 mmol), 2-bromoacetophenone derivatives **4** (0.2 mmol), NaHCO<sub>3</sub> (2.0 equiv), and 1, 2-Dichloroethane (8.0 mL) allowed to stir at 80 °C for 2 h. Followed by the addition of AgNO<sub>3</sub> (2.0 equiv), K<sub>2</sub>S<sub>2</sub>O<sub>8</sub> (2.0 equiv), and allowed to stir at 80 °C until the completion of the reaction (5-10 h) by TLC. After completion, the reaction mixture was cooled to room temperature and diluted with 20 mL of water. The water layer was extracted with (3X10 mL) of ethyl acetate, and the combined ethyl acetate layer was given brine wash (1X20 mL). The final ethyl acetate layer was dried over sodium sulfate and concentrated under reduced pressure to get the crude compound. The obtained crude was purified using column chromatography by eluting from (Hex/EA = 8/2) to afford pure heteroaryl nitrosation **2a**, **2c**, **2g**, **2l**, **2n**, **2q**, **2r** in 64-84% yields.

**(iv) The General Experimental Procedure for the One-pot strategy for the synthesis of 3-nitroso-2-phenylimidazo [1, 2-*a*] pyridine derivatives using AgNO<sub>3</sub> as the "NO" Source.**

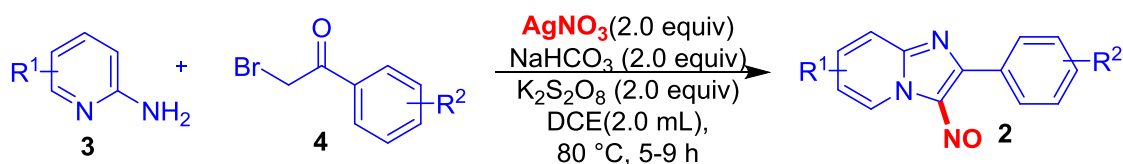

To an oven-dried sealed tube was charged with 2-aminopyridine derivatives **3** (0.2 mmol), 2-bromoacetophenone derivatives **4** (0.2 mmol), AgNO<sub>3</sub> (2.0 equiv), NaHCO<sub>3</sub> (2.0 equiv), K<sub>2</sub>S<sub>2</sub>O<sub>8</sub> (2.0 equiv) and 1, 2-Dichloroethane (8.0 mL) allowed to stir at 80 °C until the completion of the reaction (5-9 h) by TLC. After completion, the reaction mixture was cooled to room temperature and diluted with 20 mL of water. The water layer was extracted with (3X10 mL) of ethyl acetate, and the combined ethyl acetate layer was given brine wash (1X20 mL). The final ethyl acetate layer was dried over sodium sulfate and concentrated under reduced pressure to get the crude compound. The obtained crude was purified using column chromatography by eluting from (Hex/EA = 8/2) to afford pure heteroaryl nitrosation **2a**, **2c**, **2g**, **2q** 46-59% yields.

**Scheme S1.** One-pot strategy for the synthesis of 3-nitroso-2-phenylimidazo [1, 2-*a*] pyridine derivatives.<sup>a, b</sup>

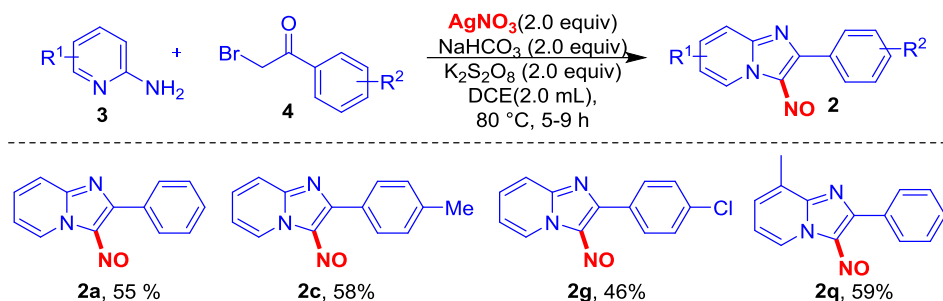

<sup>a</sup> Reaction conditions: **3** (0.2 mmol), **4** (0.2 mmol),  $\text{AgNO}_3$  (2.0 equiv),  $\text{NaHCO}_3$  (2.0 equiv),  $\text{K}_2\text{S}_2\text{O}_8$  (2.0 equiv), 1,2-Dichloroethane (1.0 mL), 80 °C, 5-9 h. <sup>b</sup> Isolated yield.

#### (4) Spectral Characterization

**3-nitroso-2-phenylimidazo[1, 2-*a*]pyridine (**2a**)**<sup>2</sup>: Following the general procedure, a 15 mL reaction tube

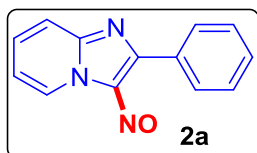

was charged with 2-phenylimidazo[1, 2-*a*]pyridine (**1a**) (38 mg, 0.2 mmol),  $\text{AgNO}_3$  (0.4 mmol),  $\text{K}_2\text{S}_2\text{O}_8$  (0.4 mmol) and 1, 2-Dichloroethane (1.0 mL) allowed to stir at 80 °C until the completion of reaction by TLC. After completion, the reaction mixture was

cooled to room temperature and diluted with 10 mL of water. The water layer was extracted with (3X10 mL) of ethyl acetate and the combined ethyl acetate layer was given brine wash (1X10 mL). The final ethyl acetate layer was dried over sodium sulfate and concentrated under reduced pressure to get the crude compound. The obtained crude was purified using column chromatography by eluting from (Hex/EA = 8/2) to afford the corresponding 3-nitroso-2-phenylimidazo[1, 2-*a*]pyridine (**2a**) as a green solid (40 mg, yield = 90%); Mp. 162.2-162.8 °C; <sup>1</sup>H NMR (400 MHz,  $\text{CDCl}_3$ )  $\delta$  9.95 (dt,  $J$  = 6.7, 1.2 Hz, 1H), 8.70 – 8.66 (m, 2H), 7.89 – 7.82 (m, 2H), 7.61 – 7.54 (m, 3H), 7.29 – 7.25 (m, 1H); <sup>13</sup>C NMR (101 MHz,  $\text{CDCl}_3$ )  $\delta$  153.37, 136.09, 131.58, 131.54, 130.83, 128.84, 126.50, 119.53, 117.50.

**3-nitroso-2-(*m*-tolyl)imidazo[1, 2-*a*]pyridine (**2b**)**<sup>3</sup>: Following the general procedure, a 15 mL reaction tube

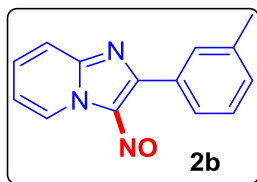

was charged with 2-(*m*-tolyl)imidazo[1, 2-*a*]pyridine (**1b**) (42 mg, 0.2 mmol),  $\text{AgNO}_3$  (0.4 mmol),  $\text{K}_2\text{S}_2\text{O}_8$  (0.4 mmol) and 1, 2-Dichloroethane (1.0 mL) allowed to stir at 80 °C until the completion of reaction by TLC. After completion, the reaction mixture was

cooled to room temperature and diluted with 10 mL of water. The water layer was extracted with (3X10 mL) of ethyl acetate and the combined ethyl acetate layer was given brine wash (1X10 mL). The final ethyl acetate layer was dried over sodium sulfate and concentrated under reduced pressure to get the crude compound. The obtained crude was purified using column chromatography by eluting from (Hex/EA = 8/2) to afford the corresponding 3-nitroso-2-(*m*-tolyl)imidazo[1, 2-*a*]pyridine (**2b**) as a green solid (39 mg, yield = 83%); Mp. 144.4-145.1 °C; <sup>1</sup>H NMR (400 MHz,  $\text{CDCl}_3$ )  $\delta$  9.95 (dt,  $J$  = 6.7, 1.2 Hz, 1H), 8.49

(dt,  $J = 3.6, 1.8, 0.7$  Hz, 2H), 7.89 – 7.82 (m, 2H), 7.48 – 7.39 (m, 2H), 7.29 – 7.24 (m, 1H), 2.49 (d,  $J = 0.7$  Hz, 3H);  $^{13}\text{C}$  NMR (101 MHz,  $\text{CDCl}_3$ )  $\delta$  160.11, 153.25, 145.61, 138.61, 136.19, 132.54, 131.29, 131.22, 128.78, 128.19, 126.56, 119.52, 117.39, 21.44.

**3-nitroso-2-(*p*-tolyl)imidazo[1, 2-*a*]pyridine (2c)<sup>4</sup>** : Following the general procedure, a 15 mL reaction tube

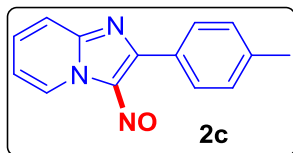

was charged with 2-(*p*-tolyl)imidazo[1, 2-*a*]pyridine (**1c**) (42 mg, 0.2 mmol),  $\text{AgNO}_3$  (0.4 mmol),  $\text{K}_2\text{S}_2\text{O}_8$  (0.4 mmol) and 1, 2-Dichloroethane (1.0 mL) allowed to stir at 80 °C until the completion of reaction by TLC. After completion, the

reaction mixture was cooled to room temperature and diluted with 10 mL of water. The water layer was extracted with (3X10 mL) of ethyl acetate and the combined ethyl acetate layer was given brine wash (1X10 mL). The final ethyl acetate layer was dried over sodium sulfate and concentrated under reduced pressure to get the crude compound. The obtained crude was purified using column chromatography by eluting from (Hex/EA = 8/2) to afford the corresponding 3-nitroso-2-(*p*-tolyl)imidazo[1, 2-*a*]pyridine (**2c**) as a green solid (41 mg, yield = 86%); Mp. 208.0-209.0 °C;  $^1\text{H}$  NMR (400 MHz,  $\text{CDCl}_3$ )  $\delta$  9.95 (dt,  $J = 6.8, 1.2$  Hz, 1H), 8.61 – 8.57 (m, 2H), 7.88 – 7.81 (m, 2H), 7.39 – 7.35 (m, 2H), 7.25 (td,  $J = 6.5, 2.0$  Hz, 1H), 2.47 (s, 3H);  $^{13}\text{C}$  NMR (101 MHz,  $\text{CDCl}_3$ )  $\delta$  160.03, 153.19, 145.78, 142.37, 136.19, 130.78, 129.67, 128.66, 126.60, 119.33, 117.32, 21.63.

**2-(4-methoxyphenyl)-3-nitrosoimidazo[1, 2-*a*]pyridine (2d)<sup>2</sup>** : Following the general procedure, a 15 mL

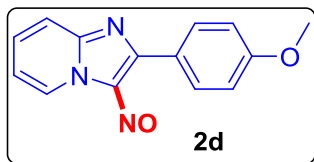

reaction tube was charged with 2-(4-methoxyphenyl)imidazo[1, 2-*a*]pyridine (**1d**) (45 mg, 0.2 mmol),  $\text{AgNO}_3$  (0.4 mmol),  $\text{K}_2\text{S}_2\text{O}_8$  (0.4 mmol) and 1,2-Dichloroethane (1.0 mL) allowed to stir at 80 °C until the completion of reaction

by TLC. After completion, the reaction mixture was cooled to room temperature and diluted with 10 mL of water. The water layer was extracted with (3X10 mL) of ethyl acetate and the combined ethyl acetate layer was given brine wash (1X10 mL). The final ethyl acetate layer was dried over sodium sulfate and concentrated under reduced pressure to get the crude compound. The obtained crude was purified using column chromatography by eluting from (Hex/EA = 8/2) to afford the corresponding 2-(4-methoxyphenyl)-3-nitrosoimidazo[1, 2-*a*]pyridine (**2d**) as a green solid (40 mg, yield = 80%); Mp. 220.4-221.5 °C;  $^1\text{H}$  NMR (400 MHz,  $\text{CDCl}_3$ )  $\delta$  9.97 (dt,  $J = 6.7, 1.2$  Hz, 1H), 8.71 – 8.65 (m, 2H), 7.84 – 7.80 (m, 2H), 7.22 (ddd,  $J = 6.7, 4.8, 3.5$  Hz, 1H), 7.09 – 7.04 (m, 2H), 3.92 (s, 3H);  $^{13}\text{C}$  NMR (101 MHz,  $\text{CDCl}_3$ )  $\delta$  162.94, 159.79, 153.02, 146.10, 136.36, 132.65, 126.77, 124.08, 119.07, 117.18, 114.46, 55.48.

**2-(2-methoxyphenyl)-3-nitrosoimidazo[1, 2-*a*]pyridine (2e)<sup>2</sup>** : Following the general procedure, a 15 mL

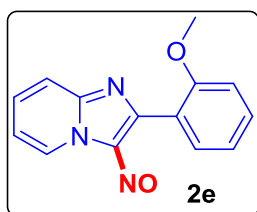

reaction tube was charged with 2-(2-methoxyphenyl)imidazo[1, 2-*a*]pyridine (**1e**) (45 mg, 0.2 mmol),  $\text{AgNO}_3$  (0.4 mmol),  $\text{K}_2\text{S}_2\text{O}_8$  (0.4 mmol) and 1, 2-Dichloroethane (1.0 mL) allowed to stir at 80 °C until the completion of reaction by TLC. After completion,

the reaction mixture was cooled to room temperature and diluted with 10 mL of water. The water layer was extracted with (3X10 mL) of ethyl acetate and the combined ethyl acetate layer was given brine wash (1X10 mL). The final ethyl acetate layer was dried over sodium sulfate and concentrated under reduced pressure to get the crude compound. The obtained crude was purified using column chromatography by eluting from (Hex/EA = 8/2) to afford the corresponding 2-(2-methoxyphenyl)-3-nitrosoimidazo[1, 2-*a*]pyridine (**2e**) as a green solid (38 mg, yield = 76%); Mp. 110.8-111.3 °C; <sup>1</sup>H NMR (400 MHz, CDCl<sub>3</sub>) δ 9.89 (dt, *J* = 6.7, 1.2 Hz, 1H), 7.95 – 7.90 (m, 2H), 7.83 (ddd, *J* = 8.7, 7.1, 1.4 Hz, 1H), 7.54 (ddd, *J* = 8.3, 7.5, 1.8 Hz, 1H), 7.29 (dd, *J* = 6.9, 1.3 Hz, 1H), 7.17 – 7.11 (m, 2H), 3.89 (s, 3H); <sup>13</sup>C NMR (101 MHz, CDCl<sub>3</sub>) δ 153.61, 135.45, 133.84, 132.17, 126.14, 120.75, 120.69, 119.39, 117.73, 111.82, 56.05.

**2-(2-chlorophenyl)-3-nitrosoimidazo[1, 2-*a*]pyridine (**2f**)<sup>2</sup>** : Following the general procedure, a 15 mL

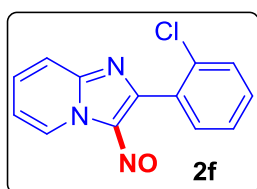

reaction tube was charged with 2-(2-chlorophenyl)imidazo[1, 2-*a*]pyridine (**1f**) (46 mg, 0.2 mmol), AgNO<sub>3</sub> (0.4 mmol), K<sub>2</sub>S<sub>2</sub>O<sub>8</sub> (0.4mmol) and 1, 2-Dichloroethane (1.0 mL) allowed to stir at 80 °C until the completion of reaction by TLC. After completion, the reaction mixture was cooled to room temperature and diluted with 10 mL of water. The

water layer was extracted with (3X10 mL) of ethyl acetate and the combined ethyl acetate layer was given brine wash (1X10 mL). The final ethyl acetate layer was dried over sodium sulfate and concentrated under reduced pressure to get the crude compound. The obtained crude was purified using column chromatography by eluting from (Hex/EA = 8/2) to afford the corresponding 2-(2-chlorophenyl)-3-nitrosoimidazo[1, 2-*a*]pyridine (**2f**) as a green solid (37 mg, yield = 72%); Mp. 146.2-146.7 °C; <sup>1</sup>H NMR (400 MHz, CDCl<sub>3</sub>) δ 9.86 (dt, *J* = 6.6, 1.2 Hz, 1H), 7.98 – 7.85 (m, 3H), 7.62 (dd, *J* = 7.9, 1.5 Hz, 1H), 7.49 (dtd, *J* = 19.4, 7.5, 1.6 Hz, 2H), 7.35 (td, *J* = 6.9, 1.3 Hz, 1H); <sup>13</sup>C NMR (101 MHz, CDCl<sub>3</sub>) δ 160.94, 153.34, 145.07, 135.64, 134.25, 133.78, 131.40, 130.76, 130.58, 126.66, 126.13, 119.95, 117.92.

**2-(4-chlorophenyl)-3-nitrosoimidazo[1, 2-*a*]pyridine (**2g**)<sup>2</sup>** : Following the general procedure, a 15 mL

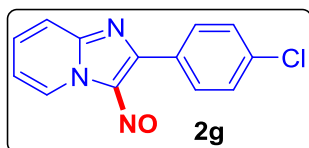

reaction tube was charged with 2-(4-chlorophenyl)imidazo[1, 2-*a*]pyridine (**1g**) (46 mg, 0.2 mmol), AgNO<sub>3</sub> (0.4 mmol), K<sub>2</sub>S<sub>2</sub>O<sub>8</sub> (0.4mmol) and 1, 2-Dichloroethane (1.0 mL) allowed to stir at 80 °C until the completion of reaction by TLC. After

completion, the reaction mixture was cooled to room temperature and diluted with 10 mL of water. The water layer was extracted with (3X10 mL) of ethyl acetate and the combined ethyl acetate layer was given brine wash (1X10 mL). The final ethyl acetate layer was dried over sodium sulfate and concentrated under reduced pressure to get the crude compound. The obtained crude was purified using column chromatography by eluting from (Hex/EA = 8/2) to afford the corresponding 2-(4-chlorophenyl)-3-nitrosoimidazo[1, 2-*a*]pyridine (**2g**) as a green solid (35 mg, yield = 68%); Mp. 219.8-220.5 °C; <sup>1</sup>H NMR (400 MHz, CDCl<sub>3</sub>) δ 9.92 (dt, *J* = 6.6, 1.2 Hz, 1H), 8.69 – 8.63 (m, 2H), 7.86 (dd, *J* = 3.7, 1.0 Hz, 2H), 7.58 – 7.48 (m, 2H), 7.31 – 7.26 (m, 1H);



$^{13}\text{C}$  NMR (101 MHz,  $\text{CDCl}_3$ )  $\delta$  158.56, 153.17, 145.59, 138.30, 136.26, 131.96, 129.97, 129.17, 126.52, 119.75, 117.50.

**2-(2-bromophenyl)-3-nitrosoimidazo[1, 2-*a*]pyridine (**2h**)<sup>2</sup>** : Following the general procedure, a 15 mL

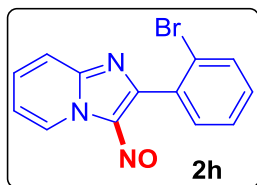

reaction tube was charged with 2-(2-bromophenyl)imidazo[1, 2-*a*]pyridine (**1h**) (55 mg, 0.2 mmol),  $\text{AgNO}_3$  (0.4 mmol),  $\text{K}_2\text{S}_2\text{O}_8$  (0.4 mmol) and 1, 2-Dichloroethane (1.0 mL) allowed to stir at 80 °C until the completion of reaction by TLC. After completion, the reaction mixture was cooled to room temperature and diluted with 10 mL of water. The

water layer was extracted with (3X10 mL) of ethyl acetate and the combined ethyl acetate layer was given brine wash (1X10 mL). The final ethyl acetate layer was dried over sodium sulfate and concentrated under reduced pressure to get the crude compound. The obtained crude was purified using column chromatography by eluting from (Hex/EA = 8/2) to afford the corresponding 2-(2-bromophenyl)-3-nitrosoimidazo[1, 2-*a*]pyridine (**2h**) as a green solid (38 mg, yield = 63%); Mp. 118.6-119.2 °C;  $^1\text{H}$  NMR (400 MHz,  $\text{CDCl}_3$ )  $\delta$  9.84 (dt,  $J$  = 6.8, 1.2 Hz, 1H), 8.01 – 7.77 (m, 4H), 7.53 – 7.33 (m, 3H);  $^{13}\text{C}$  NMR (101 MHz,  $\text{CDCl}_3$ )  $\delta$  162.18, 153.17, 144.94, 135.63, 133.72, 133.66, 132.79, 131.45, 127.16, 126.11, 123.35, 119.96, 117.91.

**2-(4-bromophenyl)-3-nitrosoimidazo[1, 2-*a*]pyridine (**2i**)<sup>3</sup>** : Following the general procedure, a 15 mL

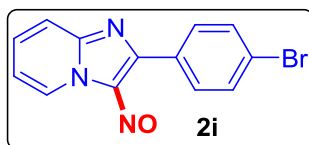

reaction tube was charged with 2-(4-bromophenyl)imidazo[1, 2-*a*]pyridine (**1i**) (55 mg, 0.2 mmol),  $\text{AgNO}_3$  (0.4 mmol),  $\text{K}_2\text{S}_2\text{O}_8$  (0.4 mmol) and 1,2-Dichloroethane (1.0 mL) allowed to stir at 80 °C until the completion of reaction by TLC. After

completion, the reaction mixture was cooled to room temperature and diluted with 10 mL of water. The water layer was extracted with (3X10 mL) of ethyl acetate, and the combined ethyl acetate layer was given brine wash (1X10 mL). The final ethyl acetate layer was dried over sodium sulfate and concentrated under reduced pressure to get the crude compound. The obtained crude was purified using column chromatography by eluting from (Hex/EA = 8/2) to afford the corresponding 2-(4-bromophenyl)-3-nitrosoimidazo[1, 2-*a*]pyridine (**2i**) as a green solid (50 mg, yield = 83%); Mp. 199.3-199.7 °C;  $^1\text{H}$  NMR (400 MHz,  $\text{CDCl}_3$ )  $\delta$  9.92 (d,  $J$  = 6.3 Hz, 1H), 8.61 – 8.56 (m, 2H), 7.86 (d,  $J$  = 2.9 Hz, 2H), 7.72 – 7.68 (m, 2H), 7.28 (d,  $J$  = 7.1 Hz, 1H);  $^{13}\text{C}$  NMR (101 MHz,  $\text{CDCl}_3$ )  $\delta$  145.61, 136.23, 132.14, 130.46, 126.96, 126.55, 119.78, 117.54.

**2-(4-fluorophenyl)-3-nitrosoimidazo[1, 2-*a*]pyridine (**2j**)<sup>2</sup>** : Following the general procedure, a 15 mL

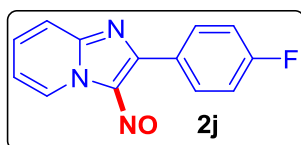

reaction tube was charged with 2-(4-fluorophenyl)imidazo[1, 2-*a*]pyridine (**1j**) (42 mg, 0.2 mmol),  $\text{AgNO}_3$  (0.4 mmol),  $\text{K}_2\text{S}_2\text{O}_8$  (0.4 mmol) and 1,2-Dichloroethane (1.0 mL) allowed to stir at 80 °C until the completion of reaction by TLC. After

completion, the reaction mixture was cooled to room temperature and diluted with 10 mL of water. The water layer was extracted with (3X10 mL) of ethyl acetate and the combined ethyl acetate layer was given brine wash (1X10 mL). The final ethyl acetate layer was dried over sodium sulfate and concentrated under reduced

pressure to get the crude compound. The obtained crude was purified using column chromatography by eluting from (Hex/EA = 8/2) to afford the corresponding 2-(4-fluorophenyl)-3-nitrosoimidazo[1, 2-*a*]pyridine (**2j**) as a green solid (31 mg, yield = 65%); Mp. 120-121 °C; <sup>1</sup>H NMR (400 MHz, CDCl<sub>3</sub>) δ 9.93 (dt, *J* = 6.7, 1.2 Hz, 1H), 8.80 – 8.66 (m, 2H), 7.90 – 7.84 (m, 2H), 7.32 – 7.22 (m, 3H); <sup>13</sup>C NMR (101 MHz, CDCl<sub>3</sub>) δ 166.65, 164.40 (*J<sub>F</sub>* = 252 Hz), 158.76, 153.05, 145.64, 136.37, 133.06, 132.97 (*J<sub>F</sub>* = 8.7 Hz), 127.66 (*J<sub>F</sub>* = 3.1 Hz), 126.61, 119.66, 117.42, 116.22 (d, *J<sub>F</sub>* = 21.4 Hz), 116.01.

**2-(4-iodophenyl)-3-nitrosoimidazo[1, 2-*a*]pyridine (**2k**)** : Following the general procedure, a 15 mL

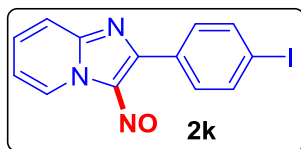

reaction tube was charged with 2-(4-iodophenyl)imidazo[1, 2-*a*]pyridine (**1k**) (64 mg, 0.2 mmol), AgNO<sub>3</sub> (0.4 mmol), K<sub>2</sub>S<sub>2</sub>O<sub>8</sub> (0.4 mmol) and 1, 2-Dichloroethane (1.0 mL) allowed to stir at 80 °C until the completion of reaction by TLC. After

completion, the reaction mixture was cooled to room temperature and diluted with 10 mL of water. The water layer was extracted with (3X10 mL) of ethyl acetate and the combined ethyl acetate layer was given brine wash (1X10 mL). The final ethyl acetate layer was dried over sodium sulfate and concentrated under reduced pressure to get the crude compound. The obtained crude was purified using column chromatography by eluting from (Hex/EA = 8/2) to afford the corresponding 2-(4-iodophenyl)-3-nitrosoimidazo[1, 2-*a*]pyridine (**2k**) as a green solid (57 mg, yield = 82%); Mp. 194.8-195.1 °C; <sup>1</sup>H NMR (400 MHz, CDCl<sub>3</sub>) δ 9.90 (dt, *J* = 6.7, 1.2 Hz, 1H), 8.47 – 8.35 (m, 2H), 7.92 – 7.82 (m, 4H), 7.31 – 7.25 (m, 1H); <sup>13</sup>C NMR (101 MHz, CDCl<sub>3</sub>) δ 158.68, 153.07, 145.51, 138.11, 136.28, 132.12, 130.89, 126.52, 119.80, 117.50, 99.52. HRMS (ESI) calcd for C<sub>13</sub>H<sub>9</sub>N<sub>3</sub>O<sub>1</sub> [M + H]<sup>+</sup>: 349.9790; found: 349.9792.

**3-nitroso-2-(4-(trifluoromethyl)phenyl)imidazo[1, 2-*a*]pyridine (**2l**)<sup>3</sup>** : Following the general procedure, a

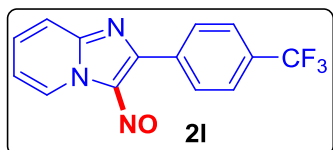

15 mL reaction tube was charged with 2-(4-(trifluoromethyl)phenyl)imidazo[1, 2-*a*]pyridine (**1l**) (52 mg, 0.2 mmol), AgNO<sub>3</sub> (0.4 mmol), K<sub>2</sub>S<sub>2</sub>O<sub>8</sub> (0.4 mmol) and 1, 2-Dichloroethane (1.0 mL) allowed to stir at 80 °C until the completion of

reaction by TLC. After completion, the reaction mixture was cooled to room temperature and diluted with 10 mL of water. The water layer was extracted with (3X10 mL) of ethyl acetate and the combined ethyl acetate layer was given brine wash (1X10 mL). The final ethyl acetate layer was dried over sodium sulfate and concentrated under reduced pressure to get the crude compound. The obtained crude was purified using column chromatography by eluting from (Hex/EA = 8/2) to afford the corresponding 3-nitroso-2-(4-(trifluoromethyl)phenyl)imidazo[1, 2-*a*]pyridine (**2l**) as a green solid (39 mg, yield = 68%); Mp. 163.7-164.2 °C; <sup>1</sup>H NMR (400 MHz, CDCl<sub>3</sub>) δ 9.91 (dt, *J* = 6.7, 1.2 Hz, 1H), 8.82 (dt, *J* = 7.9, 0.9 Hz, 2H), 7.92 – 7.79 (m, 4H), 7.32 (td, *J* = 6.6, 2.0 Hz, 1H); <sup>13</sup>C NMR (101 MHz, CDCl<sub>3</sub>) δ 158.01, 153.36, 145.41, 136.23, 134.82, 131.00 (*q*, *J<sub>CF3</sub>* = 32.4 Hz), 126.43, 125.72 (*q*, *J<sub>CF3</sub>* = 3.7 Hz), 125.69, 125.65, 125.61, 120.15 (*q*, *J<sub>CF3</sub>* = 242.2 Hz), 117.73.

**2-(3,4-dichlorophenyl)-3-nitrosoimidazo[1, 2-*a*]pyridine (2m)<sup>3</sup>** : Following the general procedure, a 15 mL

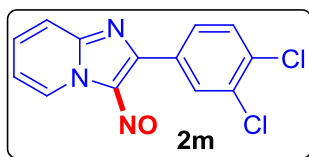

reaction tube was charged with 2-(3,4-dichlorophenyl)imidazo[1, 2-*a*]pyridine (**1m**) (53 mg, 0.2 mmol), AgNO<sub>3</sub> (0.4 mmol), K<sub>2</sub>S<sub>2</sub>O<sub>8</sub> (0.4mmol) and 1, 2-Dichloroethane (1.0 mL) allowed to stir at 80 °C until the completion of reaction

by TLC. After completion, the reaction mixture was cooled to room temperature and diluted with 10 mL of water. The water layer was extracted with (3X10 mL) of ethyl acetate and the combined ethyl acetate layer was given brine wash (1X10 mL). The final ethyl acetate layer was dried over sodium sulfate and concentrated under reduced pressure to get the crude compound. The obtained crude was purified using column chromatography by eluting from (Hex/EA = 8/2) to afford the corresponding 2-(3,4-dichlorophenyl)-3-nitrosoimidazo[1, 2-*a*]pyridine (**2m**) as a green solid (44 mg, yield = 75%); Mp. 194.7-195.4 °C; <sup>1</sup>H NMR (400 MHz, CDCl<sub>3</sub>) δ 9.89 (dt, *J* = 6.8, 1.2 Hz, 1H), 8.82 (d, *J* = 2.0 Hz, 1H), 8.58 (dd, *J* = 8.4, 2.1 Hz, 1H), 7.88 – 7.85 (m, 2H), 7.63 (d, *J* = 8.5 Hz, 1H), 7.30 (dt, *J* = 6.7, 4.2 Hz, 1H). <sup>13</sup>C NMR (101 MHz, CDCl<sub>3</sub>) δ 153.11, 145.41, 136.30, 136.23, 133.36, 132.10, 131.43, 130.87, 129.73, 126.45, 120.05, 117.62.

**2-(naphthalen-2-yl)-3-nitrosoimidazo[1, 2-*a*]pyridine (2n)<sup>4</sup>** : Following the general procedure, a 15 mL

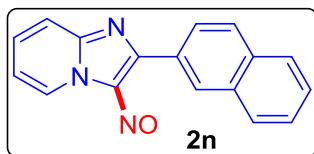

reaction tube was charged with 2-(naphthalen-2-yl)imidazo[1, 2-*a*]pyridine (**1n**) (38 mg, 0.2 mmol), AgNO<sub>3</sub> (0.4 mmol), K<sub>2</sub>S<sub>2</sub>O<sub>8</sub> (0.4 mmol) and 1, 2-Dichloroethane (1.0 mL) allowed to stir at 80 °C until the completion of reaction

by TLC. After completion, the reaction mixture was cooled to room temperature and diluted with 10 mL of water. The water layer was extracted with (3X10 mL) of ethyl acetate and the combined ethyl acetate layer was given brine wash (1X10 mL). The final ethyl acetate layer was dried over sodium sulfate and concentrated under reduced pressure to get the crude compound. The obtained crude was purified using column chromatography by eluting from (Hex/EA = 8/2) to afford the corresponding 2-(naphthalen-2-yl)-3-nitrosoimidazo[1, 2-*a*]pyridine (**2n**) as a green solid (41 mg, yield = 76%); Mp. 206.2-206.7 °C; <sup>1</sup>H NMR (400 MHz, CDCl<sub>3</sub>) δ 9.97 (d, *J* = 5.9 Hz, 1H), 9.33 – 9.29 (m, 1H), 8.76 (dd, *J* = 8.7, 1.6 Hz, 1H), 8.06 – 7.99 (m, 2H), 7.94 – 7.85 (m, 3H), 7.57 (dddd, *J* = 16.6, 8.1, 6.8, 1.3 Hz, 2H), 7.26 (s, 1H); <sup>13</sup>C NMR (101 MHz, CDCl<sub>3</sub>) δ 159.82, 145.83, 136.18, 134.86, 133.27, 132.16, 129.55, 128.92, 128.47, 127.91, 127.74, 126.60, 126.59, 126.57, 119.52, 117.47.

**2-(furan-2-yl)-3-nitrosoimidazo[1, 2-*a*]pyridine (2o)<sup>2</sup>** : Following the general procedure, a 15 mL reaction

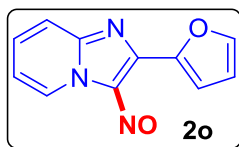

tube was charged with 2-(furan-2-yl)imidazo[1, 2-*a*]pyridine (**1o**) (37 mg, 0.2 mmol), AgNO<sub>3</sub> (0.4 mmol), K<sub>2</sub>S<sub>2</sub>O<sub>8</sub> (0.4 mmol) and 1, 2-Dichloroethane (1.0 mL) allowed to stir at 80 °C until the completion of reaction by TLC. After completion, the reaction mixture

was cooled to room temperature and diluted with 10 mL of water. The water layer was extracted with (3X10 mL) of ethyl acetate and the combined ethyl acetate layer was given brine wash (1X10 mL). The final ethyl acetate layer was dried over sodium sulfate and concentrated under reduced pressure to get the crude

compound. The obtained crude was purified using column chromatography by eluting from (Hex/EA = 8/2) to afford the corresponding 2-(furan-2-yl)-3-nitrosoimidazo[1, 2-*a*]pyridine (**2o**) as a green solid (36 mg, yield = 85%); Mp. 193.8-194.1 °C; <sup>1</sup>H NMR (400 MHz, CDCl<sub>3</sub>) δ 9.87 (dt, *J* = 6.7, 1.2 Hz, 1H), 7.88 – 7.81 (m, 4H), 7.29 – 7.23 (m, 1H), 6.70 (dd, *J* = 3.5, 1.7 Hz, 1H); <sup>13</sup>C NMR (101 MHz, CDCl<sub>3</sub>) δ 151.11, 147.16, 146.55, 146.46, 136.43, 126.46, 119.45, 118.87, 117.52, 113.34.

**3-nitroso-2-(thiophen-2-yl)imidazo[1, 2-*a*]pyridine (**2p**)<sup>2</sup>** : Following the general procedure, a 15 mL

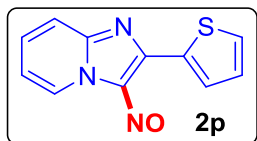

reaction tube was charged with 2-(thiophen-2-yl)imidazo[1, 2-*a*]pyridine (**1p**) (40 mg, 0.2 mmol), AgNO<sub>3</sub> (0.4 mmol), K<sub>2</sub>S<sub>2</sub>O<sub>8</sub> (0.4 mmol) and 1, 2-Dichloroethane (1.0 mL) allowed to stir at 80 °C until the completion of reaction by TLC. After completion, the

reaction mixture was cooled to room temperature and diluted with 10 mL of water. The water layer was extracted with (3X10 mL) of ethyl acetate and the combined ethyl acetate layer was given brine wash (1X10 mL). The final ethyl acetate layer was dried over sodium sulfate and concentrated under reduced pressure to get the crude compound. The obtained crude was purified using column chromatography by eluting from (Hex/EA = 8/2) to afford the corresponding 3-nitroso-2-(thiophen-2-yl)imidazo[1, 2-*a*]pyridine (**2p**) as a green solid (37 mg, yield = 81%); Mp. 190.8-191.4 °C; <sup>1</sup>H NMR (400 MHz, CDCl<sub>3</sub>) δ 9.88 (dt, *J* = 6.7, 1.2 Hz, 1H), 8.49 (dd, *J* = 3.8, 1.2 Hz, 1H), 7.85 – 7.78 (m, 2H), 7.74 (dd, *J* = 5.0, 1.1 Hz, 1H), 7.29 – 7.21 (m, 2H); <sup>13</sup>C NMR (101 MHz, CDCl<sub>3</sub>) δ 155.71, 146.34, 136.51, 134.15, 133.35, 133.03, 129.10, 126.61, 119.20, 117.16.

**8-methyl-3-nitroso-2-phenylimidazo[1, 2-*a*]pyridine (**2q**)<sup>4</sup>** : Following the general procedure, a 15 mL

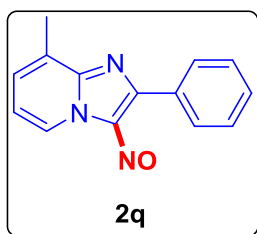

reaction tube was charged with 8-methyl-2-phenylimidazo[1, 2-*a*]pyridine (**1q**) (42 mg, 0.2 mmol), AgNO<sub>3</sub> (0.4 mmol), K<sub>2</sub>S<sub>2</sub>O<sub>8</sub> (0.4 mmol) and 1,2-Dichloroethane (1.0 mL) allowed to stir at 80 °C until the completion of reaction by TLC. After completion, the reaction mixture was cooled to room temperature and diluted with 10 mL of water. The water layer was extracted with (3X10 mL) of ethyl acetate and the combined ethyl

acetate layer was given brine wash (1X10 mL). The final ethyl acetate layer was dried over sodium sulfate and concentrated under reduced pressure to get the crude compound. The obtained crude was purified using column chromatography by eluting from (Hex/EA = 8/2) to afford the corresponding 8-methyl-3-nitroso-2-phenylimidazo[1, 2-*a*]pyridine (**2q**) as a green solid (37 mg, yield = 78%); Mp. 131.4-131.9 °C; <sup>1</sup>H NMR (400 MHz, CDCl<sub>3</sub>) δ 9.81 (d, *J* = 6.8 Hz, 1H), 8.73 – 8.65 (m, 2H), 7.63 (dt, *J* = 7.2, 1.2 Hz, 1H), 7.58 – 7.52 (m, 3H), 7.15 (t, *J* = 7.0 Hz, 1H), 2.76 (s, 3H); <sup>13</sup>C NMR (101 MHz, CDCl<sub>3</sub>) δ 159.37, 153.76, 145.58, 135.42, 131.84, 131.33, 130.83, 128.74, 127.92, 124.24, 119.42, 16.51.

**6-chloro-3-nitroso-2-phenylimidazo[1, 2-*a*]pyridine (2r)<sup>2</sup>** : Following the general procedure, a 15 mL

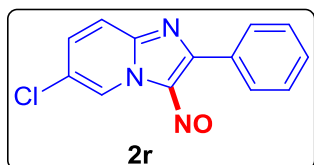

reaction tube was charged with 6-chloro-2-phenylimidazo[1, 2-*a*]pyridine (**1r**) (46 mg, 0.2 mmol), AgNO<sub>3</sub> (0.4 mmol), K<sub>2</sub>S<sub>2</sub>O<sub>8</sub> (0.4 mmol) and 1, 2-Dichloroethane (1.0 mL) allowed to stir at 80 °C until the completion of reaction by TLC. After completion, the reaction mixture was cooled to room temperature and diluted with

10 mL of water. The water layer was extracted with (3X10 mL) of ethyl acetate and the combined ethyl acetate layer was given brine wash (1X10 mL). The final ethyl acetate layer was dried over sodium sulfate and concentrated under reduced pressure to get the crude compound. The obtained crude was purified using column chromatography by eluting from (Hex/EA = 8/2) to afford the corresponding 6-chloro-3-nitroso-2-phenylimidazo[1, 2-*a*]pyridine (**2r**) as a green solid (41 mg, yield = 80%); Mp. 213.2-214.0 °C; <sup>1</sup>H NMR (400 MHz, CDCl<sub>3</sub>) δ 10.02 (t, *J* = 1.4 Hz, 1H), 8.69 – 8.64 (m, 2H), 7.80 (d, *J* = 1.4 Hz, 2H), 7.63 – 7.54 (m, 3H); <sup>13</sup>C NMR (101 MHz, CDCl<sub>3</sub>) δ 159.81, 153.13, 143.78, 136.64, 131.82, 131.25, 130.81, 128.94, 127.45, 124.42, 117.76.

**6-bromo-3-nitroso-2-phenylimidazo[1, 2-*a*]pyridine (2s)<sup>3</sup>** : Following the general procedure, a 15 mL

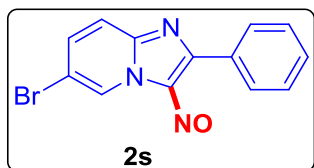

reaction tube was charged with 6-bromo-2-phenylimidazo[1, 2-*a*]pyridine (**1s**) (55 mg, 0.2 mmol), AgNO<sub>3</sub> (0.4 mmol), K<sub>2</sub>S<sub>2</sub>O<sub>8</sub> (0.4 mmol) and 1, 2-Dichloroethane (1.0 mL) allowed to stir at 80 °C until the completion of reaction by TLC. After completion, the reaction mixture was cooled to room temperature and diluted with

10 mL of water. The water layer was extracted with (3X10 mL) of ethyl acetate and the combined ethyl acetate layer was given brine wash (1X10 mL). The final ethyl acetate layer was dried over sodium sulfate and concentrated under reduced pressure to get the crude compound. The obtained crude was purified using column chromatography by eluting from (Hex/EA = 8/2) to afford the corresponding 6-bromo-3-nitroso-2-phenylimidazo[1, 2-*a*]pyridine (**2s**) as a green solid (47 mg, yield = 78%); Mp. 217.3-218.3 °C; <sup>1</sup>H NMR (400 MHz, CDCl<sub>3</sub>) δ 10.10 (dd, *J* = 1.9, 0.8 Hz, 1H), 8.68 – 8.65 (m, 2H), 7.90 (dd, *J* = 9.2, 2.0 Hz, 1H), 7.74 (dd, *J* = 9.3, 0.8 Hz, 1H), 7.63 – 7.54 (m, 3H); <sup>13</sup>C NMR (101 MHz, CDCl<sub>3</sub>) δ 159.62, 152.95, 143.93, 138.96, 131.82, 131.22, 130.82, 128.94, 126.42, 118.05, 113.88, 77.32, 77.00, 76.68.

**8-bromo-6-methyl-3-nitroso-2-phenylimidazo[1, 2-*a*]pyridine (2t)<sup>2</sup>** : Following the general procedure, a 15

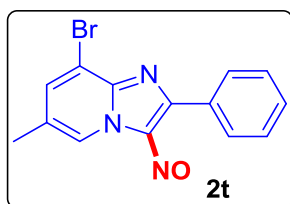

mL reaction tube was charged with 8-bromo-6-methyl-2-phenylimidazo[1, 2-*a*]pyridine (**1t**) (57 mg, 0.2 mmol), AgNO<sub>3</sub> (0.4 mmol), K<sub>2</sub>S<sub>2</sub>O<sub>8</sub> (0.4 mmol) and 1,2-Dichloroethane (1.0 mL) allowed to stir at 80 °C until the completion of reaction by TLC. After completion, the reaction mixture was cooled to room temperature and

diluted with 10 mL of water. The water layer was extracted with (3X10 mL) of ethyl acetate and the combined ethyl acetate layer was given brine wash (1X10 mL). The final ethyl acetate layer was dried over sodium sulfate and concentrated under reduced pressure to get the crude compound. The obtained crude was

purified using column chromatography by eluting from (Hex/EA = 8/2) to afford the corresponding 8-bromo-6-methyl-3-nitroso-2-phenylimidazo[1, 2-*a*]pyridine (**2t**) as a green solid (48 mg, yield = 76%); Mp. 168.2-169.6 °C; <sup>1</sup>H NMR (400 MHz, CDCl<sub>3</sub>) δ 10.13 (s, 1H), 9.06 – 9.04 (m, 2H), 8.29 (s, 1H), 7.94 (dd, *J* = 8.0, 6.8 Hz, 3H), 2.80 (s, 3H); <sup>13</sup>C NMR (101 MHz, CDCl<sub>3</sub>) δ 159.98, 140.71, 131.75, 131.33, 131.01, 130.74, 128.83, 111.71, 18.16.

**3-nitroso-2,6-diphenylimidazo[1, 2-*a*]pyridine (**2u**)** : Following the general procedure, a 15 mL reaction

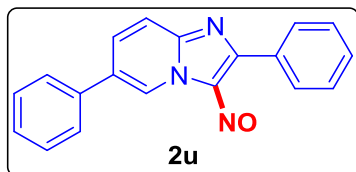

tube was charged with 2,6-diphenylimidazo[1, 2-*a*]pyridine (**1u**) (54 mg, 0.2 mmol), AgNO<sub>3</sub> (0.4 mmol), K<sub>2</sub>S<sub>2</sub>O<sub>8</sub> (0.4 mmol) and 1, 2-Dichloroethane (1.0 mL) allowed to stir at 80 °C until the completion of reaction by TLC. After completion, the reaction mixture was cooled to room temperature and diluted

with 10 mL of water. The water layer was extracted with (3X10 mL) of ethyl acetate and the combined ethyl acetate layer was given brine wash (1X10 mL). The final ethyl acetate layer was dried over sodium sulfate and concentrated under reduced pressure to get the crude compound. The obtained crude was purified using column chromatography by eluting from (Hex/EA = 8/2) to afford the corresponding 3-nitroso-2, 6-diphenylimidazo[1, 2-*a*]pyridine (**2u**) as a green solid (48 mg, yield = 81%); Mp. 171.6-172.3 °C; <sup>1</sup>H NMR (400 MHz, CDCl<sub>3</sub>) δ 10.21 (dd, *J* = 1.9, 0.9 Hz, 1H), 8.71 – 8.68 (m, 2H), 8.09 (dd, *J* = 9.1, 1.9 Hz, 1H), 7.93 (dd, *J* = 9.1, 0.9 Hz, 1H), 7.63 – 7.45 (m, 8H); <sup>13</sup>C NMR (101 MHz, CDCl<sub>3</sub>) δ 135.99, 134.48, 131.68, 131.43, 130.84, 129.43, 129.03, 128.89, 127.15, 123.91, 117.19. HRMS (ESI) calcd for C<sub>19</sub> H<sub>14</sub>N<sub>3</sub>O [M + H]<sup>+</sup>: 300.1137; found: 300.1138.

**3-nitroso-2-phenyl-6-(*p*-tolyl)imidazo[1, 2-*a*]pyridine (**2v**)** : Following the general procedure, a 15 mL

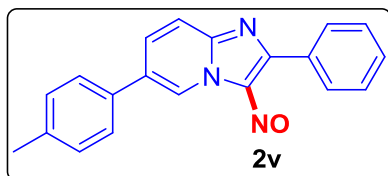

reaction tube was charged 2-phenyl-6-(*p*-tolyl)imidazo[1, 2-*a*]pyridine (**1v**) (57 mg, 0.2 mmol), AgNO<sub>3</sub> (0.4 mmol), K<sub>2</sub>S<sub>2</sub>O<sub>8</sub> (0.4 mmol) and 1, 2-Dichloroethane (1.0 mL) allowed to stir at 80 °C until the completion of reaction by TLC. After completion, the reaction mixture was cooled to room

temperature and diluted with 10 mL of water. The water layer was extracted with (3X10 mL) of ethyl acetate and the combined ethyl acetate layer was given brine wash (1X10 mL). The final ethyl acetate layer was dried over sodium sulfate and concentrated under reduced pressure to get the crude compound. The obtained crude was purified using column chromatography by eluting from (Hex/EA = 8/2) to afford the corresponding 3-nitroso-2-phenyl-6-(*p*-tolyl)imidazo[1, 2-*a*]pyridine (**2v**) as a green solid (49 mg, yield = 79%); Mp. 221.5-222.4 °C; <sup>1</sup>H NMR (400 MHz, CDCl<sub>3</sub>) δ 10.21 (s, 1H), 8.71 (d, *J* = 7.3 Hz, 2H), 8.12 – 8.08 (m, 1H), 7.95 (d, *J* = 9.0 Hz, 1H), 7.64 – 7.48 (m, 6H), 7.37 – 7.33 (m, 2H), 2.45 (s, 3H); <sup>13</sup>C NMR (101 MHz, CDCl<sub>3</sub>) δ 139.27, 136.09, 134.65, 132.38, 131.76, 130.85, 130.16, 128.93, 126.98, 123.77, 117.05, 21.21. HRMS (ESI) calcd for C<sub>20</sub>H<sub>16</sub>N<sub>3</sub>O [M + H]<sup>+</sup>: 314.1293; found: 314.1296



**8-methyl-3-nitroso-2-(*p*-tolyl)imidazo[1, 2-*a*]pyridine (2w)<sup>3</sup>** : Following the general procedure, a 15 mL

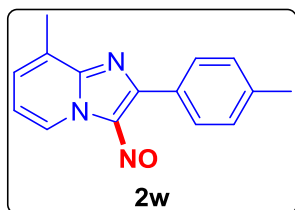

reaction tube was charged with 8-methyl-2-(*p*-tolyl)imidazo[1, 2-*a*]pyridine (**1w**) (44 mg, 0.2 mmol), AgNO<sub>3</sub> (0.4 mmol), K<sub>2</sub>S<sub>2</sub>O<sub>8</sub> (0.4 mmol) and 1, 2-Dichloroethane (1.0 mL) allowed to stir at 80 °C until the completion of reaction by TLC. After completion, the reaction mixture was cooled to room temperature and diluted with

10 mL of water. The water layer was extracted with (3X10 mL) of ethyl acetate and the combined ethyl acetate layer was given brine wash (1X10 mL). The final ethyl acetate layer was dried over sodium sulfate and concentrated under reduced pressure to get the crude compound. The obtained crude was purified using column chromatography by eluting from (Hex/EA = 8/2) to afford the corresponding 8-methyl-3-nitroso-2-(*p*-tolyl)imidazo[1, 2-*a*]pyridine (**2w**) as a green solid (35 mg, yield = 69%); Mp. 169.2-170.1 °C; <sup>1</sup>H NMR (400 MHz, CDCl<sub>3</sub>) δ 9.83 (d, *J* = 6.4 Hz, 1H), 8.63 – 8.57 (m, 2H), 7.65 (d, *J* = 7.1 Hz, 1H), 7.36 (d, *J* = 8.0 Hz, 2H), 7.15 (t, *J* = 6.9 Hz, 1H), 2.76 (s, 3H), 2.46 (s, 3H); <sup>13</sup>C NMR (101 MHz, CDCl<sub>3</sub>) δ 159.71, 145.99, 142.15, 135.79, 130.82, 129.61, 128.99, 127.87, 124.67, 119.30, 21.65, 16.55.

**6-chloro-3-nitroso-2-(*p*-tolyl)imidazo[1, 2-*a*]pyridine (2x)<sup>2</sup>** : Following the general procedure, a 15 mL

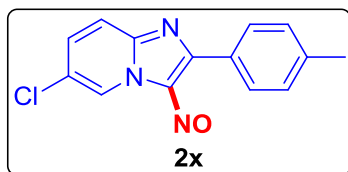

reaction tube was charged with 6-chloro-2-(*p*-tolyl)imidazo[1, 2-*a*]pyridine (**1x**) (49 mg, 0.2 mmol), AgNO<sub>3</sub> (0.4 mmol), K<sub>2</sub>S<sub>2</sub>O<sub>8</sub> (0.4 mmol) and 1, 2-Dichloroethane (1.0 mL) allowed to stir at 80 °C until the completion of reaction by TLC. After completion, the reaction mixture was cooled to room

temperature and diluted with 10 mL of water. The water layer was extracted with (3X10 mL) of ethyl acetate and the combined ethyl acetate layer was given brine wash (1X10 mL). The final ethyl acetate layer was dried over sodium sulfate and concentrated under reduced pressure to get the crude compound. The obtained crude was purified using column chromatography by eluting from (Hex/EA = 8/2) to afford the corresponding 6-chloro-3-nitroso-2-(*p*-tolyl)imidazo[1,2-*a*]pyridine (**2x**) as a green solid (43 mg, yield = 79%); Mp. 228.0-229.0 °C; <sup>1</sup>H NMR (400 MHz, CDCl<sub>3</sub>) δ 9.99 (t, *J* = 1.5 Hz, 1H), 8.57 – 8.53 (m, 2H), 7.76 (d, *J* = 1.5 Hz, 2H), 7.37 – 7.33 (m, 2H), 2.45 (s, 3H); <sup>13</sup>C NMR (101 MHz, CDCl<sub>3</sub>) δ 159.69, 152.91, 143.80, 142.65, 136.68, 130.72, 129.75, 128.33, 127.18, 124.44, 117.55, 21.64.

**2-(furan-2-yl)-3-nitroso-6-phenylimidazo[1, 2-*a*]pyridine (2y)** : Following the general procedure, a 15 mL

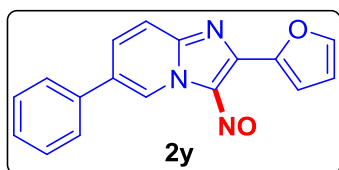

reaction tube was charged with 2-(furan-2-yl)-6-phenylimidazo[1, 2-*a*]pyridine (**1y**) (52 mg, 0.2 mmol), AgNO<sub>3</sub> (0.4 mmol), K<sub>2</sub>S<sub>2</sub>O<sub>8</sub> (0.4 mmol) and 1, 2-Dichloroethane (1.0 mL) allowed to stir at 80 °C until the completion of reaction by TLC. After completion, the reaction mixture was cooled to room temperature

and diluted with 10 mL of water. The water layer was extracted with (3X10 mL) of ethyl acetate and the combined ethyl acetate layer was given brine wash (1X10 mL). The final ethyl acetate layer was dried over sodium sulfate and concentrated under reduced pressure to get the crude compound. The obtained crude was

purified using column chromatography by eluting from (Hex/EA = 8/2) to afford the corresponding 2-(furan-2-yl)-3-nitroso-6-phenylimidazo[1, 2-*a*]pyridine (**2y**) as a green solid (47 mg, yield = 81%); Mp. 198.5-199.2 °C; <sup>1</sup>H NMR (400 MHz, CDCl<sub>3</sub>) δ 10.14 (dd, *J* = 1.9, 0.9 Hz, 1H), 8.06 (dd, *J* = 9.0, 1.9 Hz, 1H), 7.90 – 7.86 (m, 2H), 7.83 (dd, *J* = 3.5, 0.7 Hz, 1H), 7.61 – 7.58 (m, 2H), 7.55 – 7.45 (m, 3H), 6.70 (dd, *J* = 3.5, 1.7 Hz, 1H); <sup>13</sup>C NMR (101 MHz, CDCl<sub>3</sub>) δ 151.22, 147.17, 146.66, 136.16, 135.30, 134.32, 129.43, 129.04, 127.11, 123.76, 118.84, 117.28, 113.38. HRMS (ESI) calcd for C<sub>17</sub>H<sub>12</sub>N<sub>3</sub>O<sub>2</sub> [M + H]<sup>+</sup>: 290.0930; found: 290.0933.

**2-phenylimidazo[1, 2-*a*]pyridin-3-amine (**5**)<sup>2</sup>**: To a stirred solution of **2a** (0.1 g, 0.45 mmol) in glacial acetic

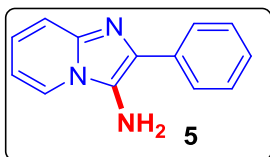

acid (2 mL) was added iron powder (0.075 g, 1.35 mmol). The resulting suspension was stirred at 100 °C for 3 h. After completion of the reaction (as determined by TLC), the reaction mixture was filtered through a bed of celite to remove the iron residue,

which was washed with ethyl acetate (30 mL). The filtrate was partitioned with 2 M KOH, and the basic layer was further extracted with ethyl acetate (3 × 25 mL). The combined organic extracts were washed with brine (35 mL), dried with anhydrous Na<sub>2</sub>SO<sub>4</sub>, and concentrated under reduced pressure. The obtained crude was purified using column chromatography by eluting from (Hex/EA = 6/4) to afford the corresponding 2-phenylimidazo[1, 2-*a*]pyridin-3-amine (**3**) as a yellow solid (88 mg, yield = 86%); Mp. 119-121 °C; <sup>1</sup>H NMR (400 MHz, CDCl<sub>3</sub>) δ 7.99 (d, *J* = 6.8 Hz, 1H), 7.94 (d, *J* = 7.6 Hz, 2H), 7.53 (d, *J* = 9.2 Hz, 1H), 7.43 (t, *J* = 7.6 Hz, 2H), 7.29 (dd, *J* = 14.8, 7.2 Hz, 1H), 7.09 (d, *J* = 7.6 Hz, 1H), 6.78 (d, *J* = 6.8 Hz, 1H), 3.51 (s, 2H); <sup>13</sup>C NMR (101 MHz, CDCl<sub>3</sub>) δ 140.69, 134.05, 132.49, 128.67, 128.29, 127.17, 127.05, 126.90, 123.43, 122.76, 121.88, 117.04, 111.79.



**(5) References:**

1 (a) S. Samanta and A. Hajra, *J. Org. Chem.*, 2019, **84**, 4363-4371; (b) M. H. Shinde and U. A. Kshirsagar, *Green Chem.*, 2016, **18**, 1455-1458.

2 S. Mukhopadhyay, S. U. Dighe, S. Kolle, P. K. Shukla and S. Batra, *Eur. J. Org. Chem.*, 2016, **2016**, 3836-3844.

3 D. Yang, K. Yan, W. Wei, Y. Liu, M. Zhang, C. Zhao, L. Tian and H. Wang, *Synthesis (Stuttg.)*, 2016, **48**, 122-130.

4 K. Monir, M. Ghosh, S. Jana, P. Mondal, A. Majee and A. Hajra, *Org. Biomol. Chem.*, 2015, **13**, 8717-8722.

9.960  
9.958  
9.955  
9.944  
9.941  
9.938  
8.691  
8.687  
8.685  
8.682  
8.676  
8.672  
8.671  
8.668  
8.664  
7.859  
7.856  
7.843  
7.838  
7.835  
7.832  
7.828  
7.824  
7.822  
7.816  
7.811

Solvent  $\text{CDCl}_3$   
Spectrometer Frequency 400.40  
Nucleus  $^1\text{H}$

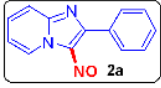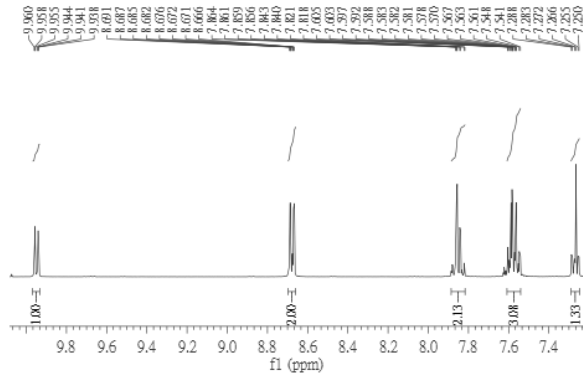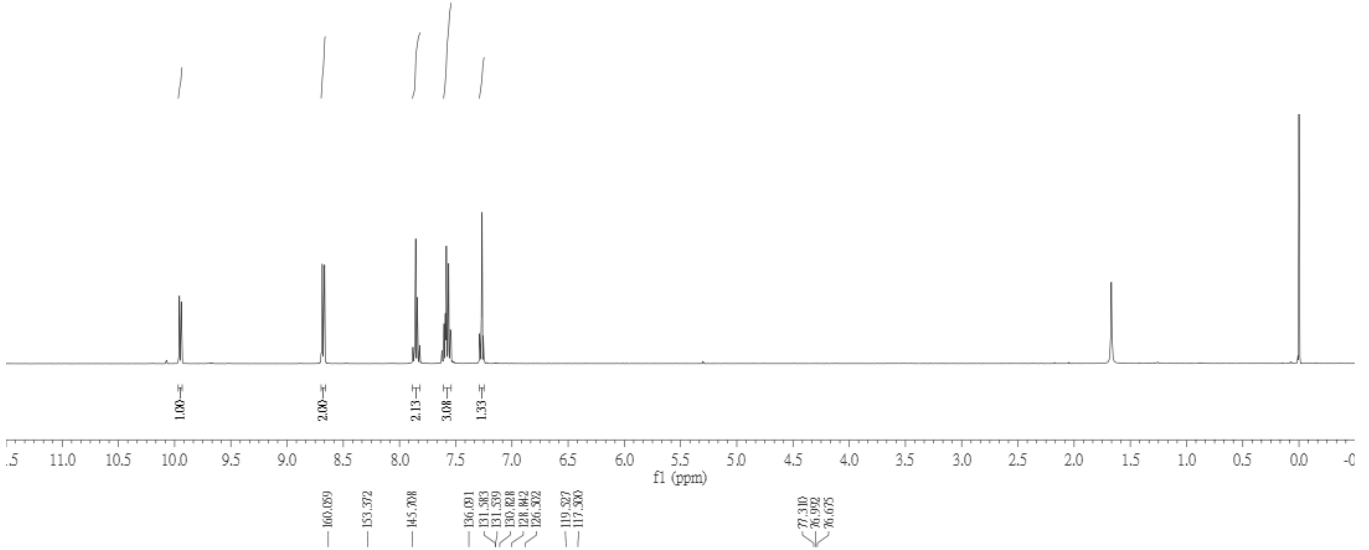

Solvent  $\text{CDCl}_3$   
Spectrometer Frequency 100.69  
Nucleus  $^{13}\text{C}$

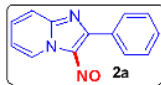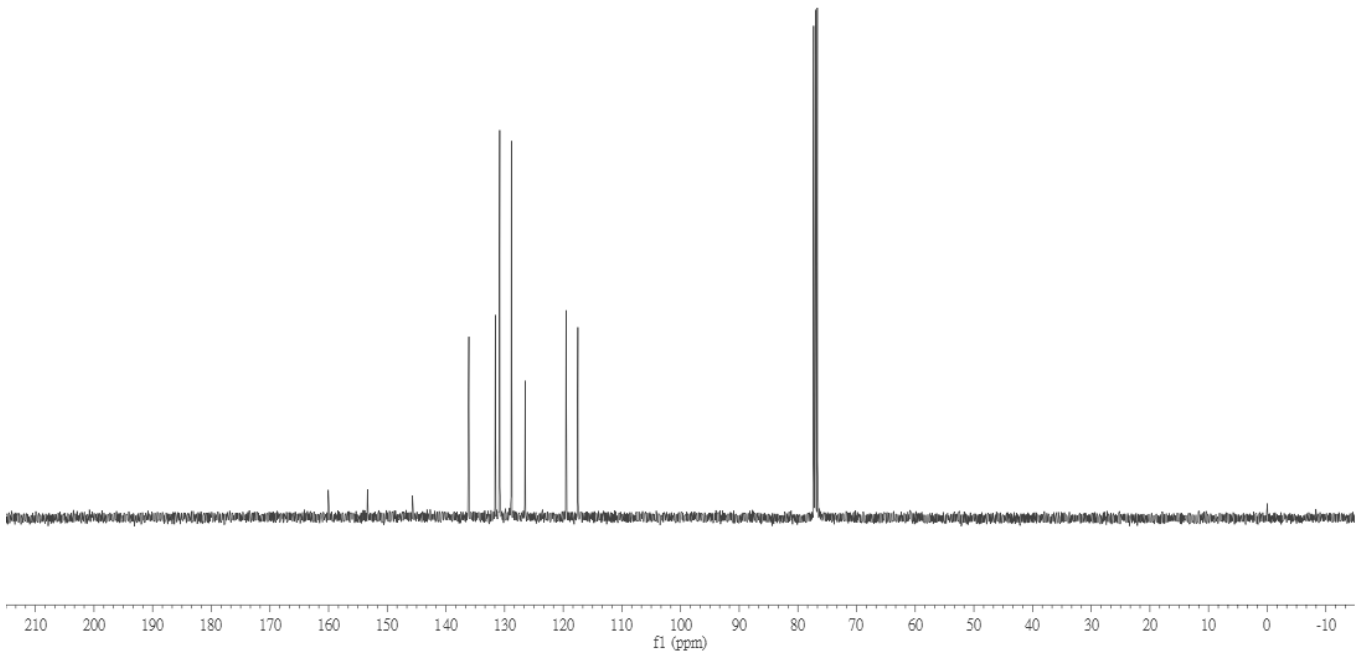



Solvent  $\text{CDCl}_3$   
 Spectrometer Frequency 400.40  
 Nucleus  $^1\text{H}$

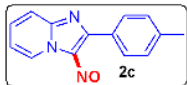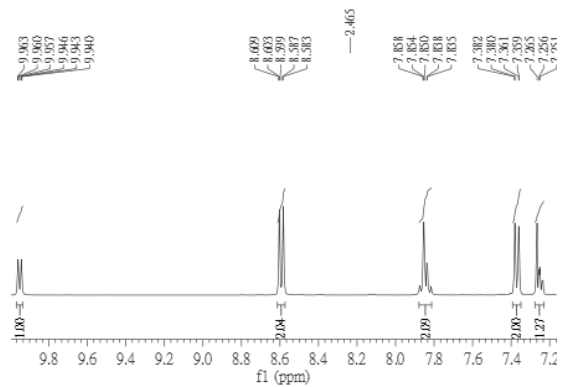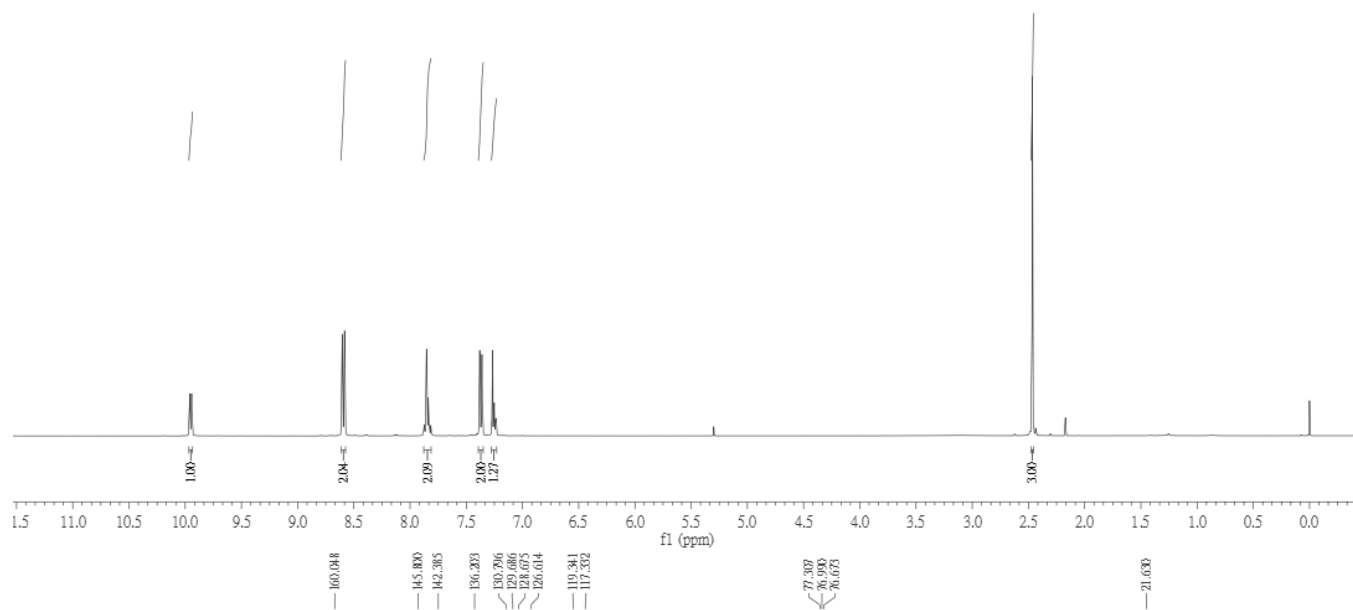

Solvent  $\text{CDCl}_3$   
 Spectrometer Frequency 100.69  
 Nucleus  $^{13}\text{C}$

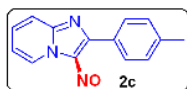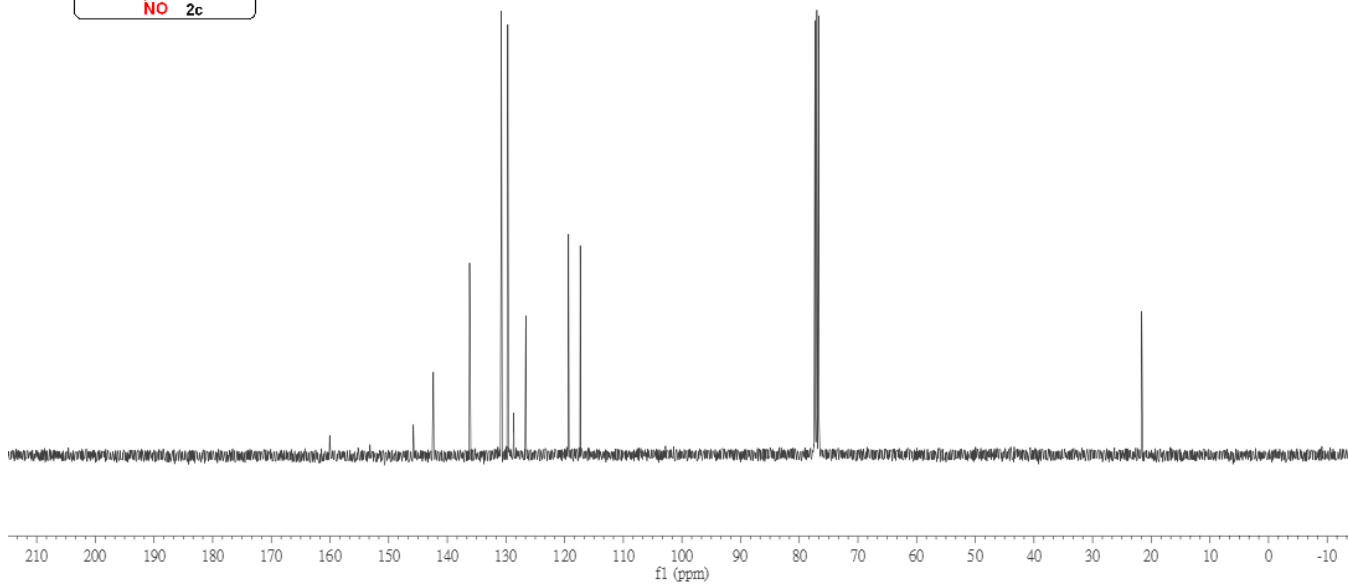

Solvent  $\text{CDCl}_3$   
 Spectrometer Frequency 400.40  
 Nucleus  $^1\text{H}$

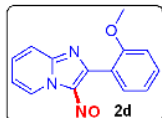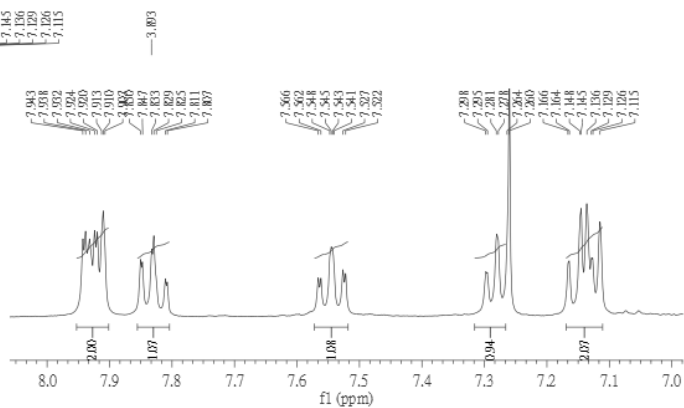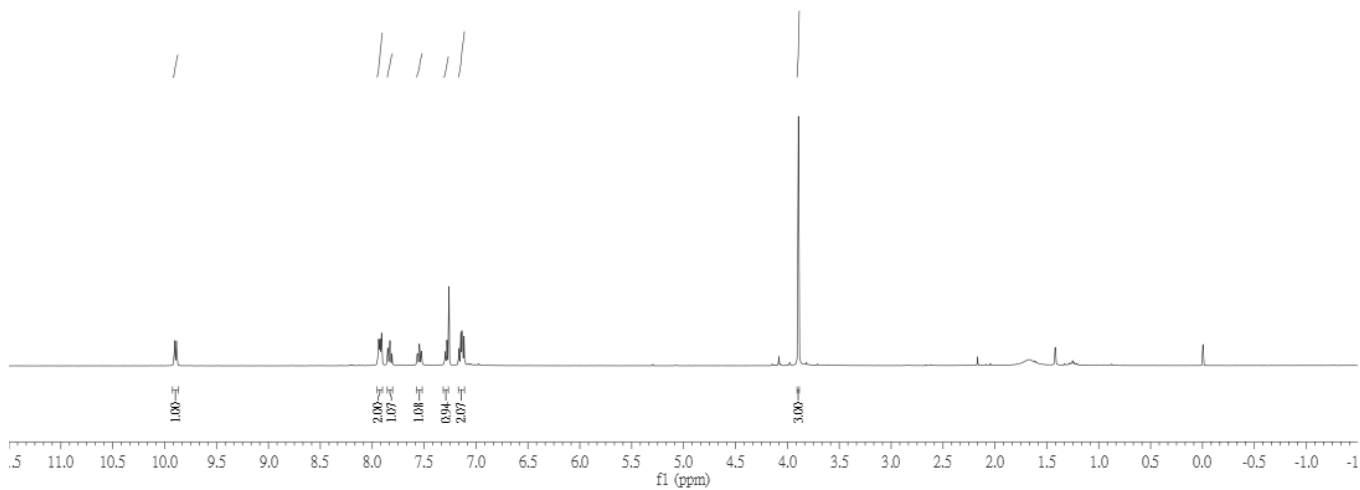

Solvent  $\text{CDCl}_3$   
 Spectrometer Frequency 100.69  
 Nucleus  $^{13}\text{C}$

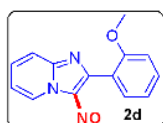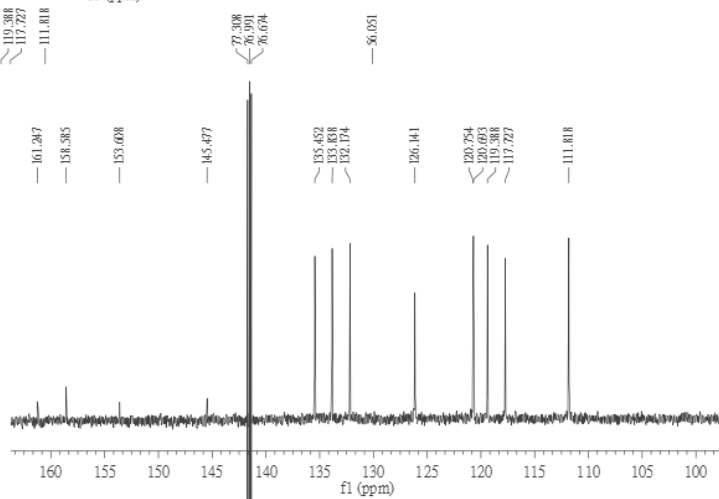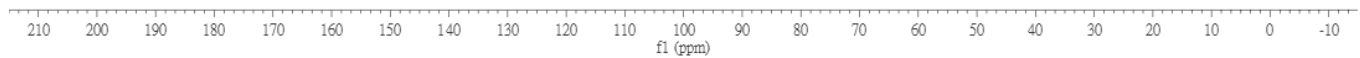

Solvent  $\text{CDCl}_3$   
 Spectrometer Frequency 400.40  
 Nucleus  $^1\text{H}$

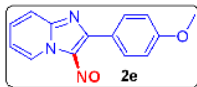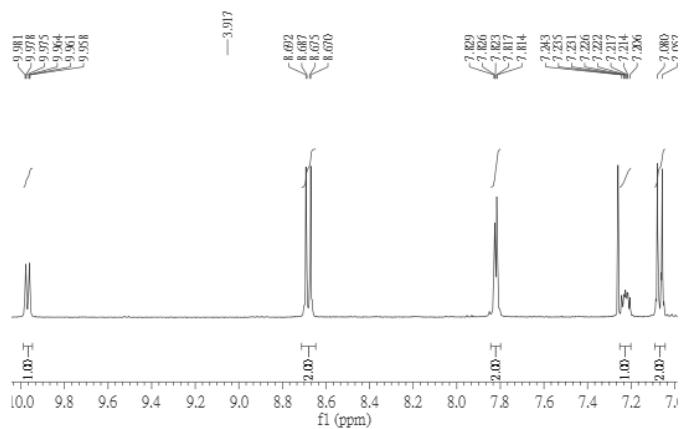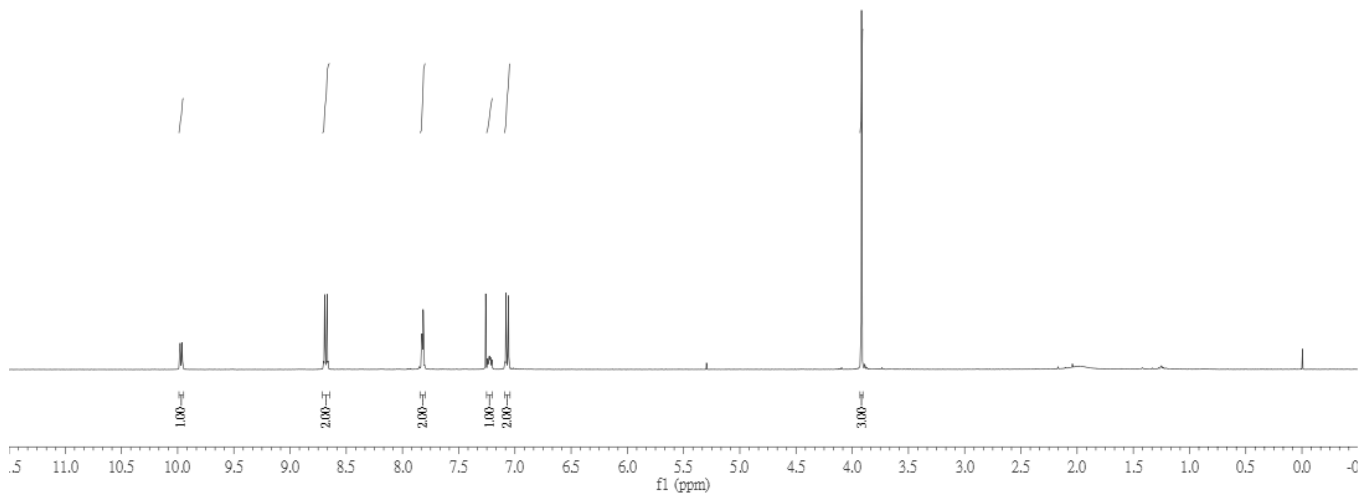

Solvent  $\text{CDCl}_3$   
 Spectrometer Frequency 100.69  
 Nucleus  $^{13}\text{C}$

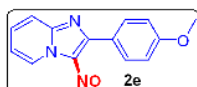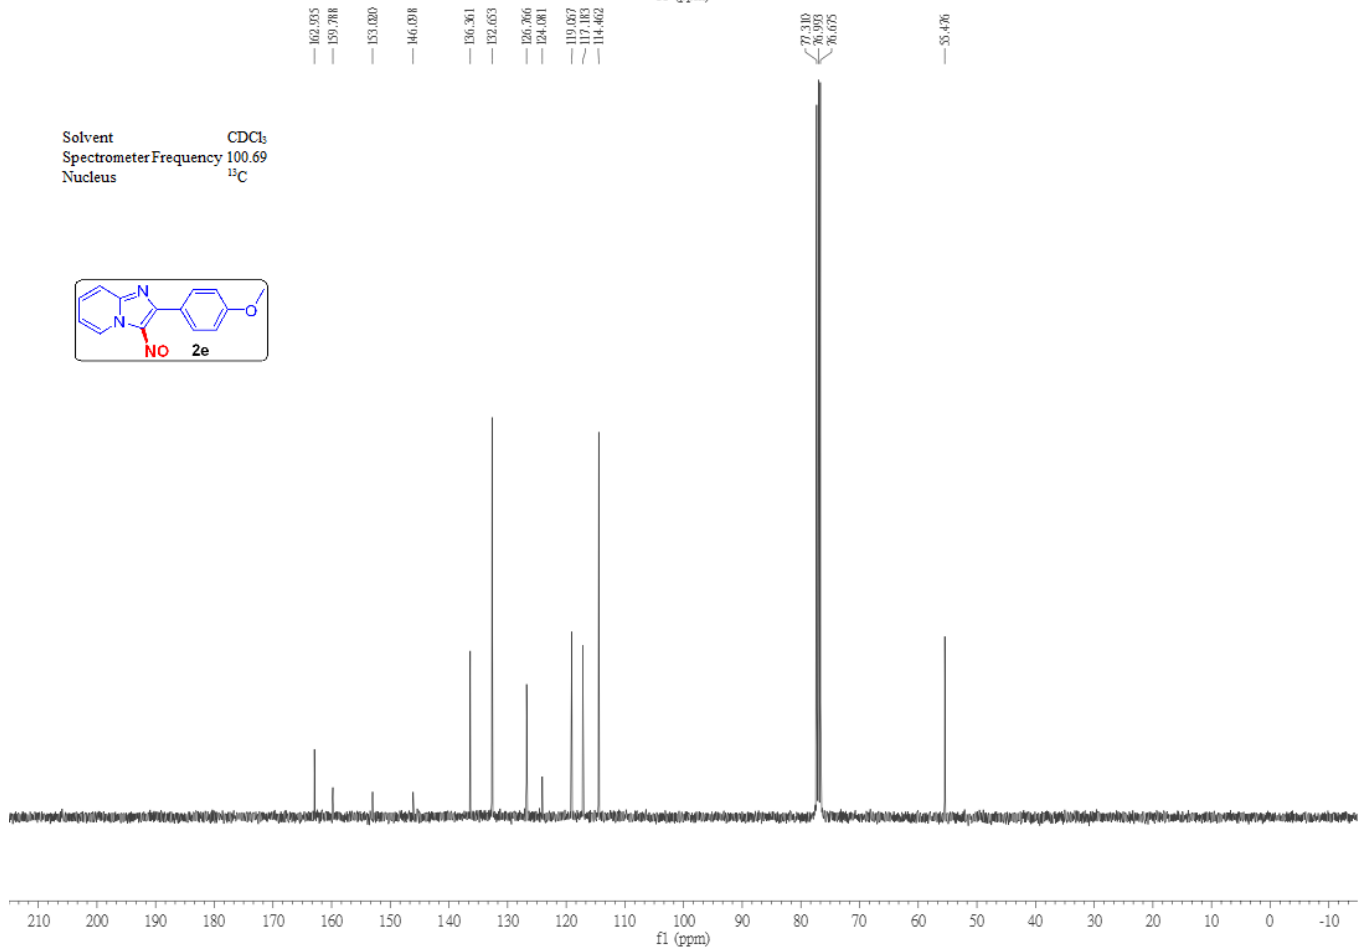

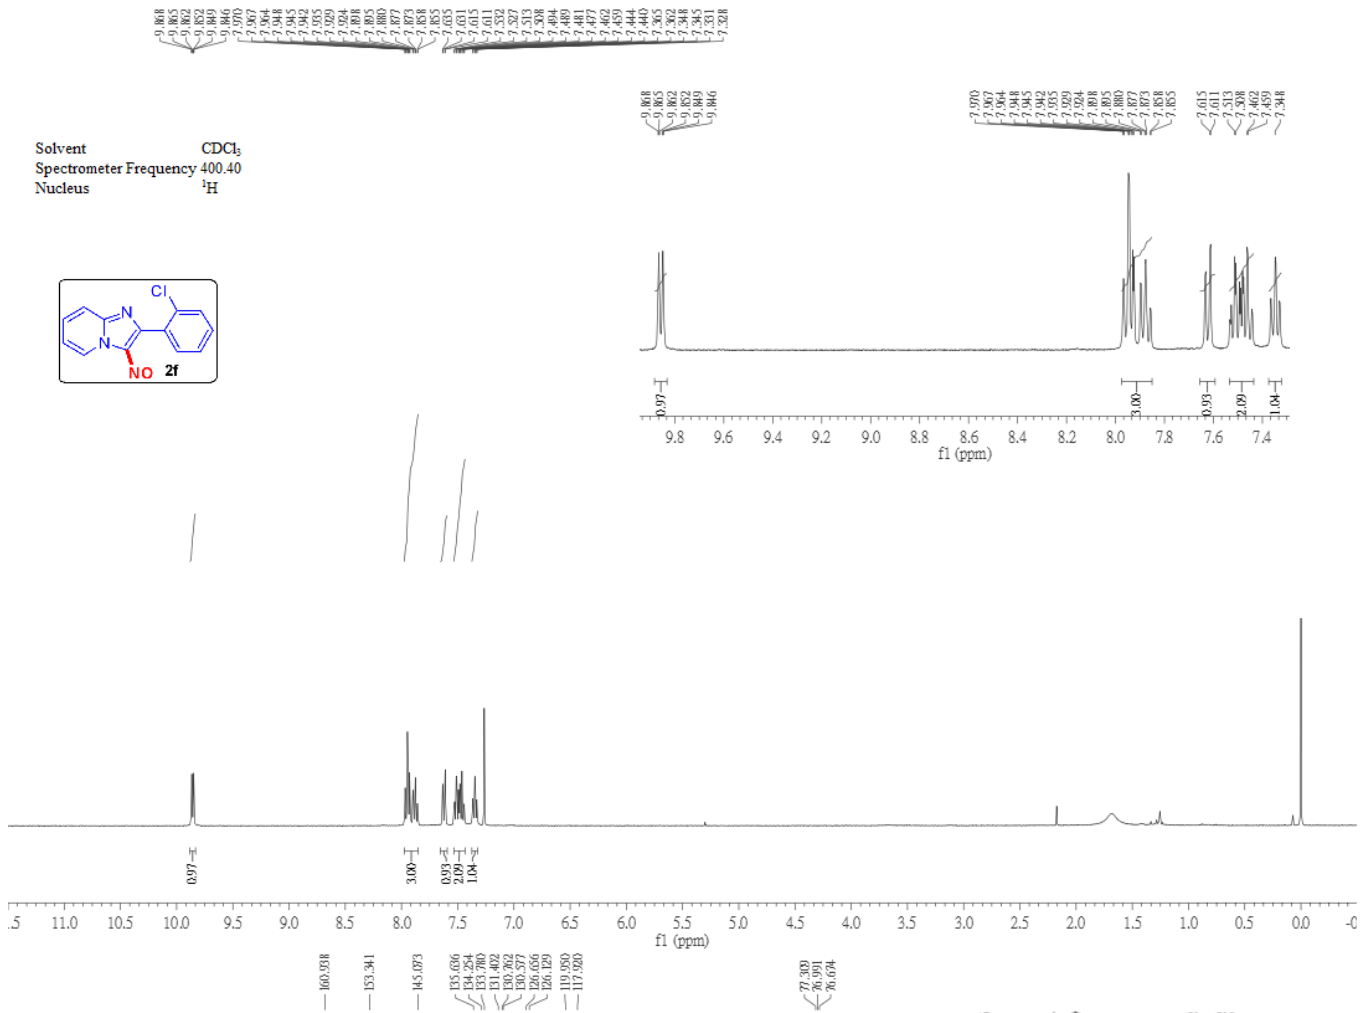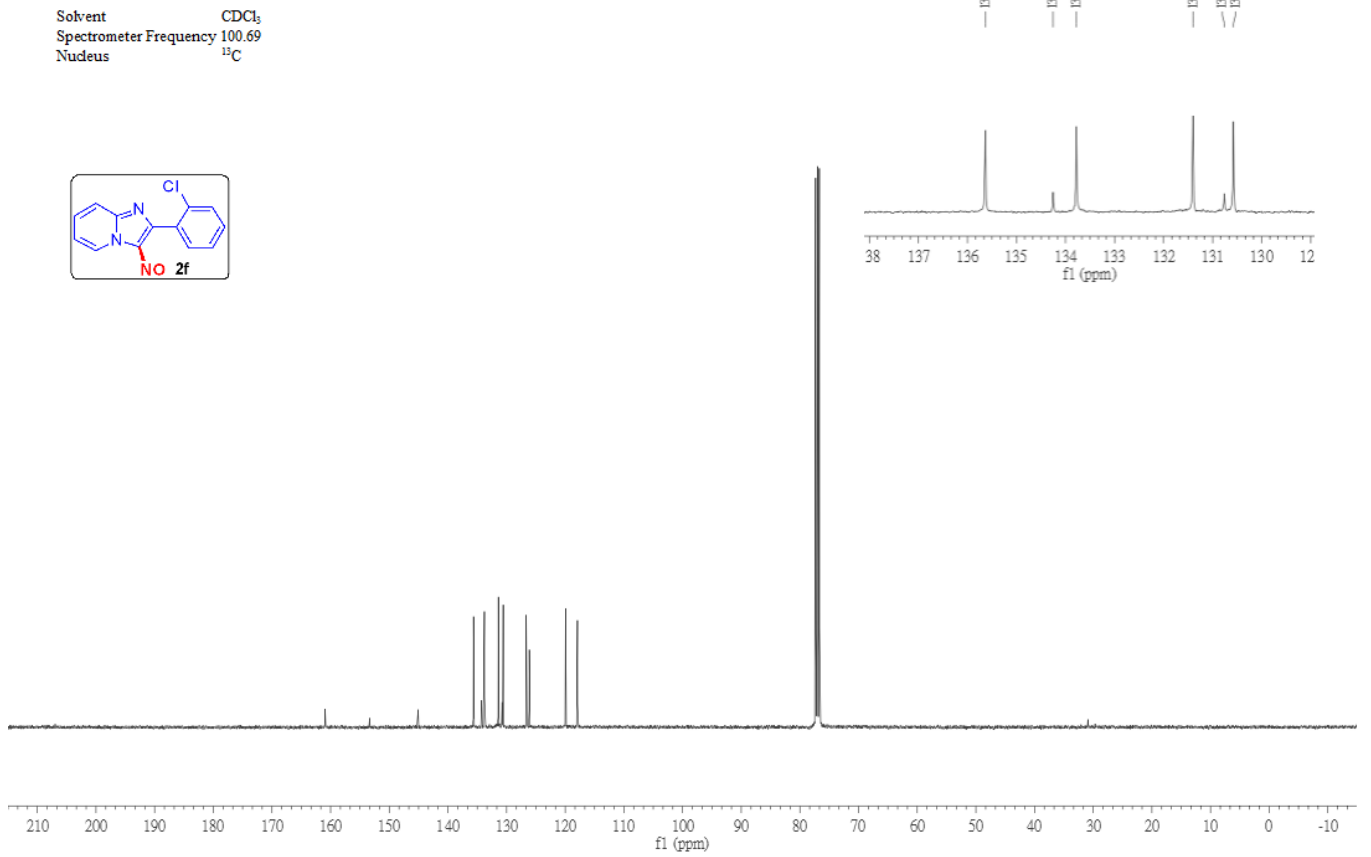

Solvent  $\text{CDCl}_3$   
 Spectrometer Frequency 400.40  
 Nucleus  $^1\text{H}$

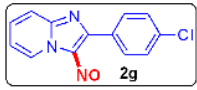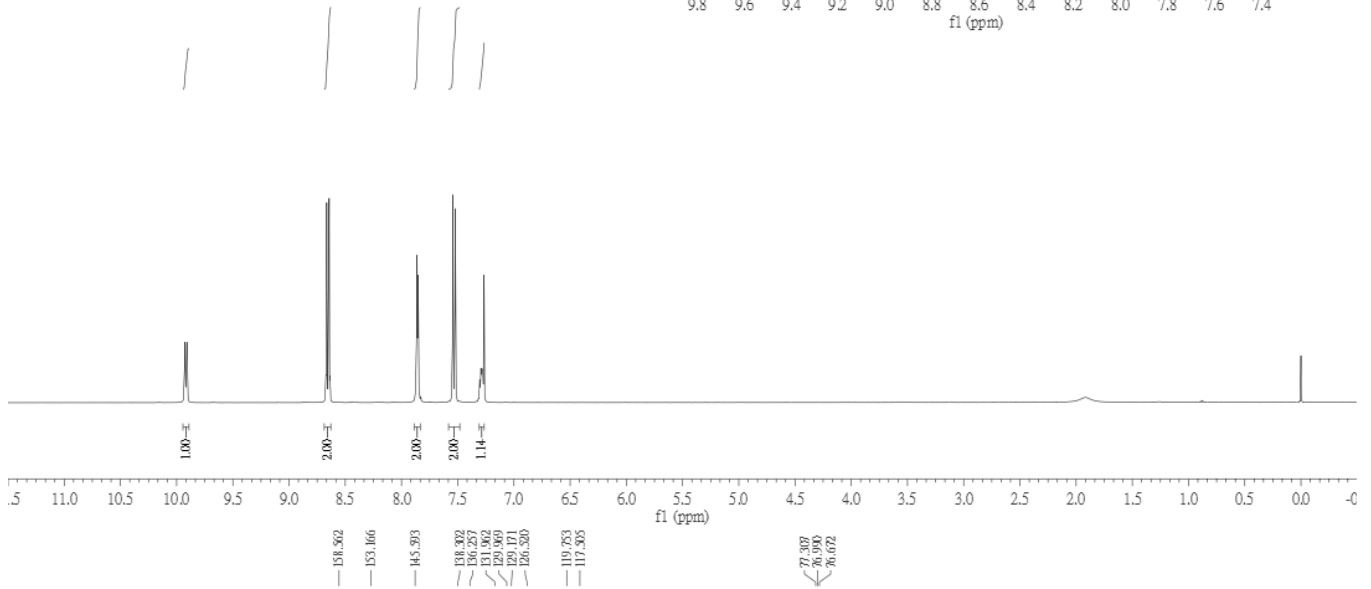



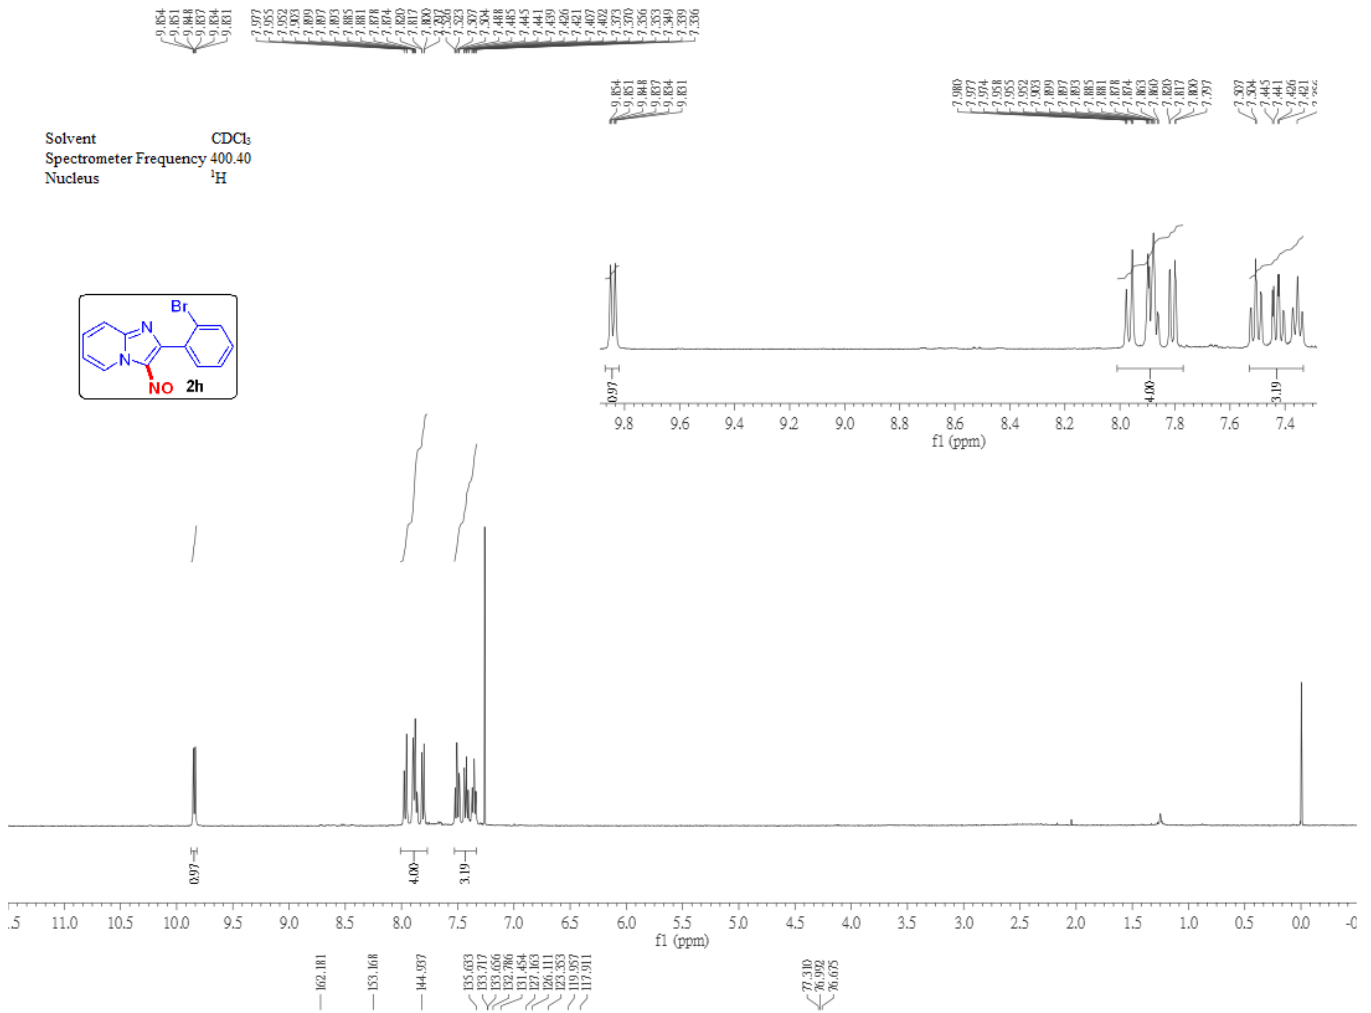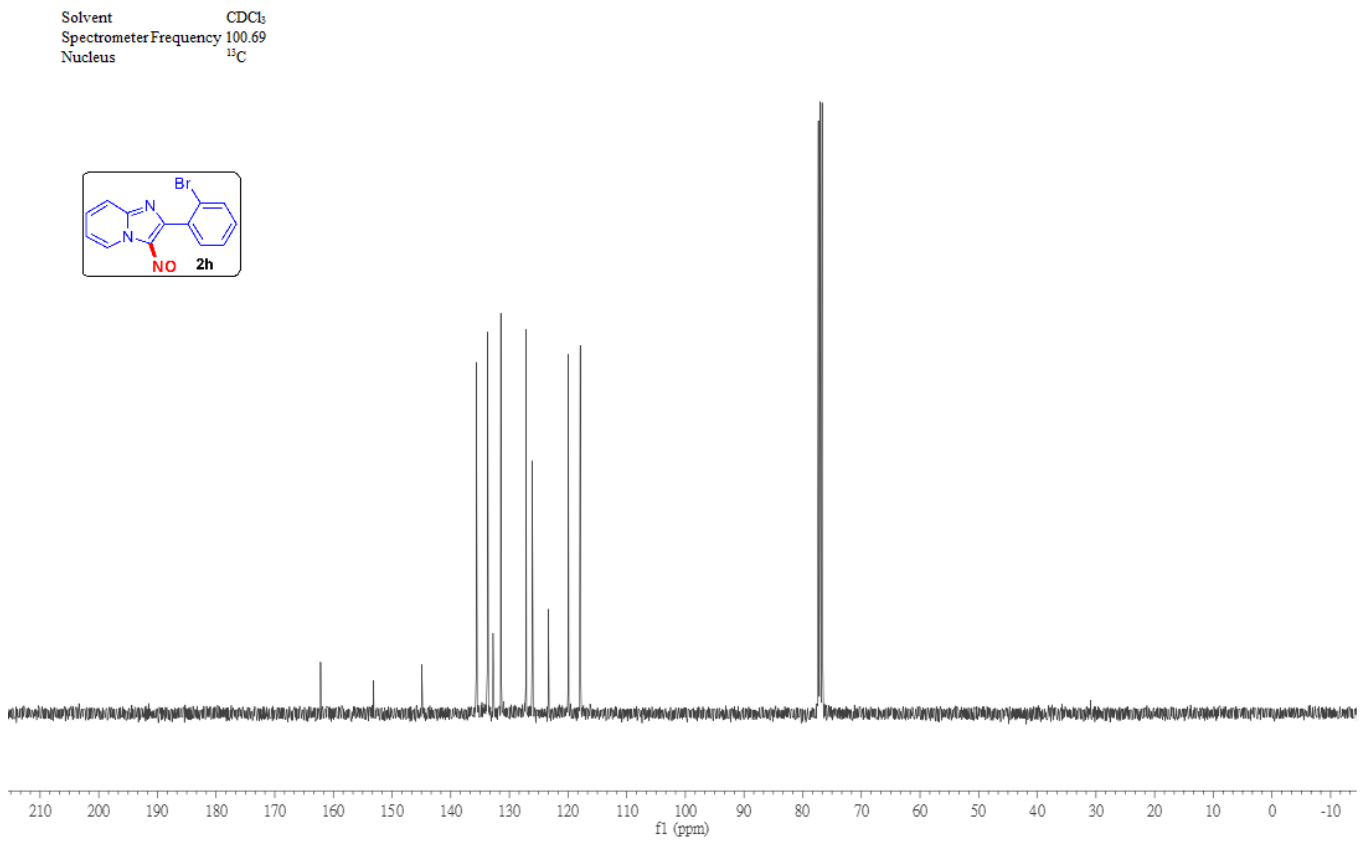

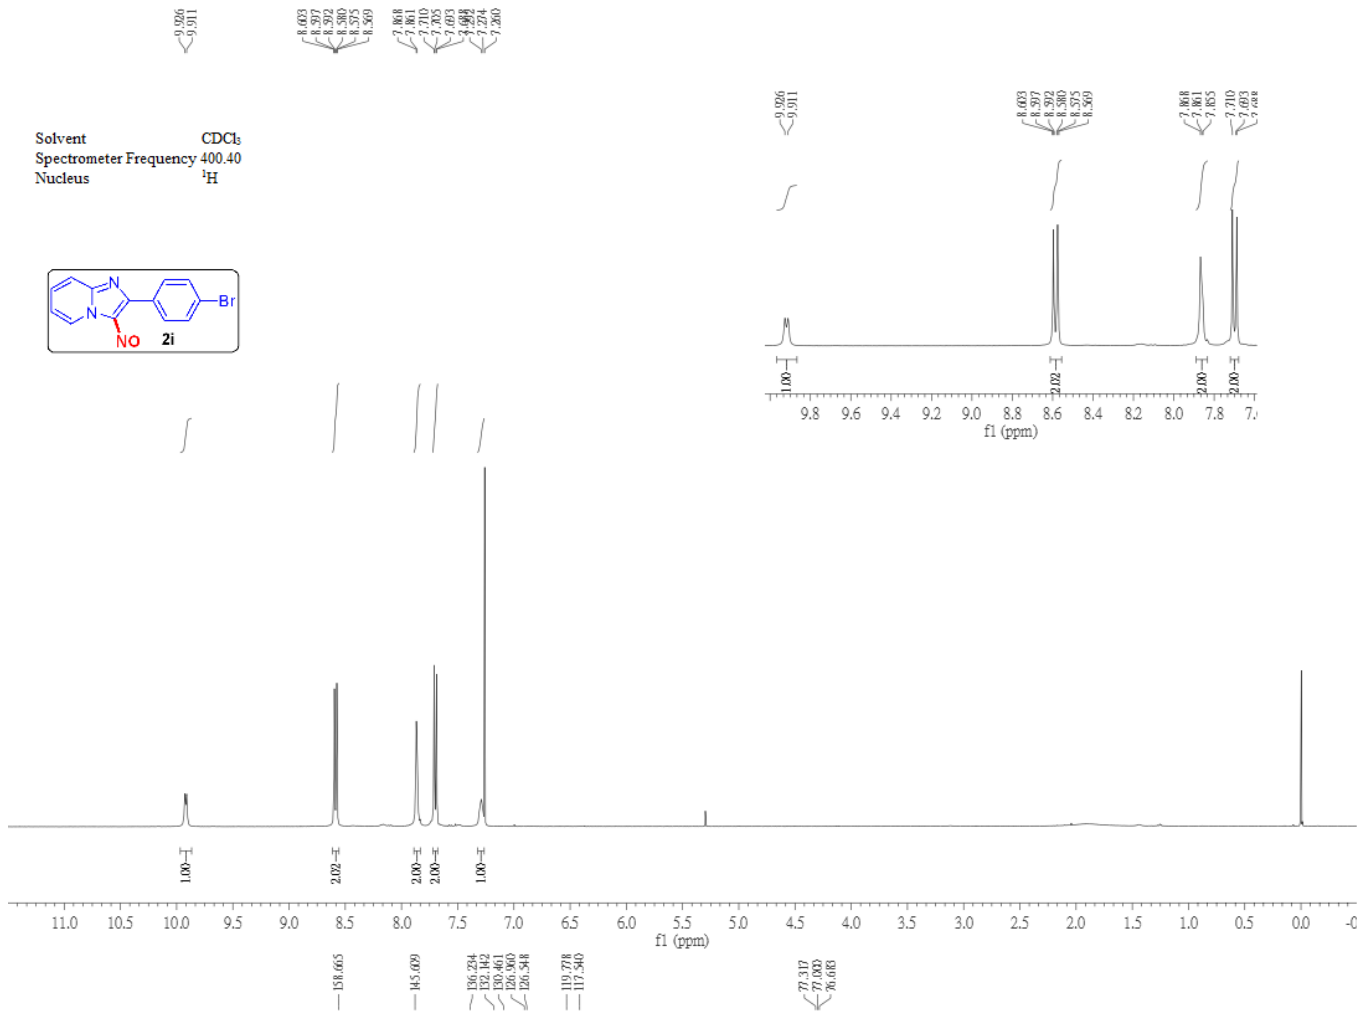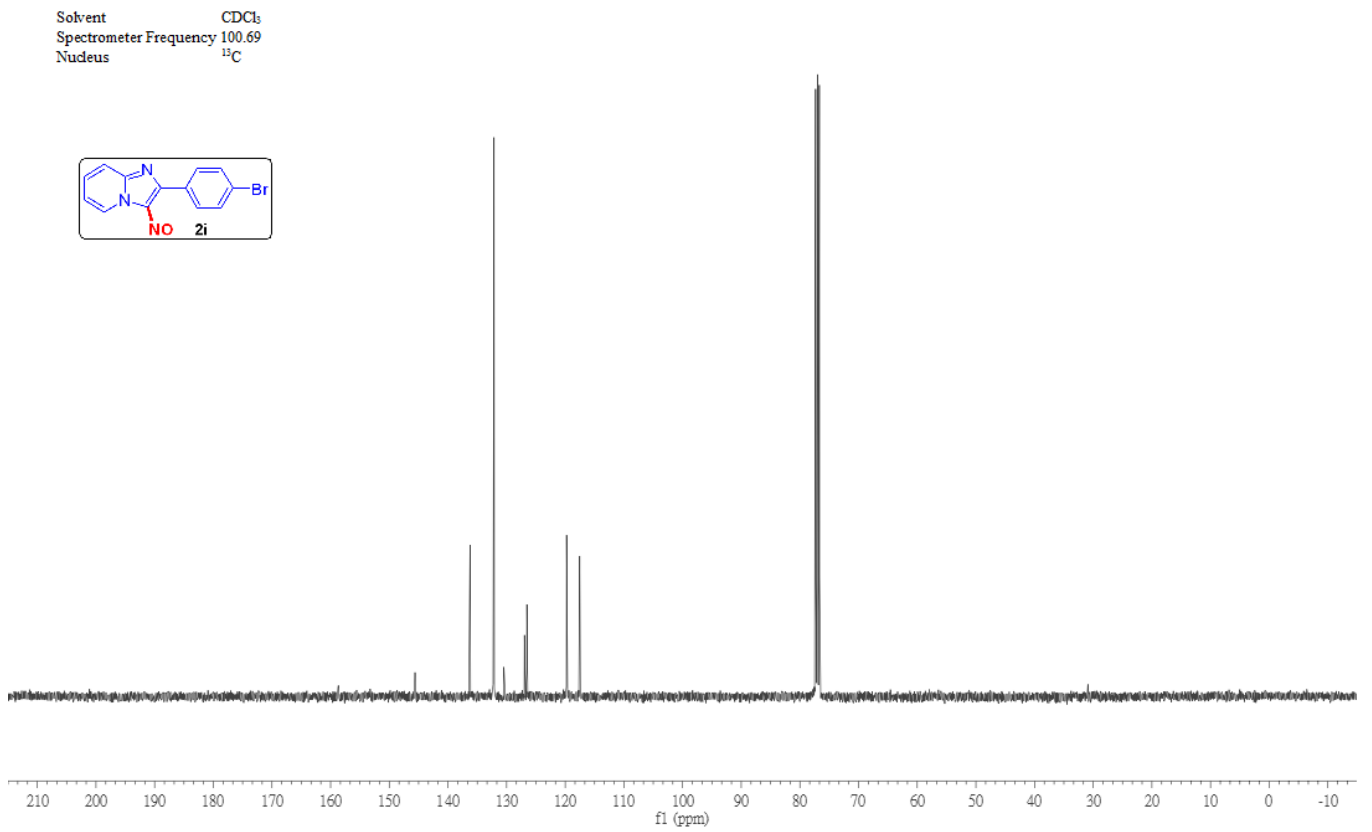



Solvent  $\text{CDCl}_3$   
 Spectrometer Frequency 400.40  
 Nucleus  $^1\text{H}$

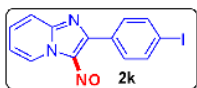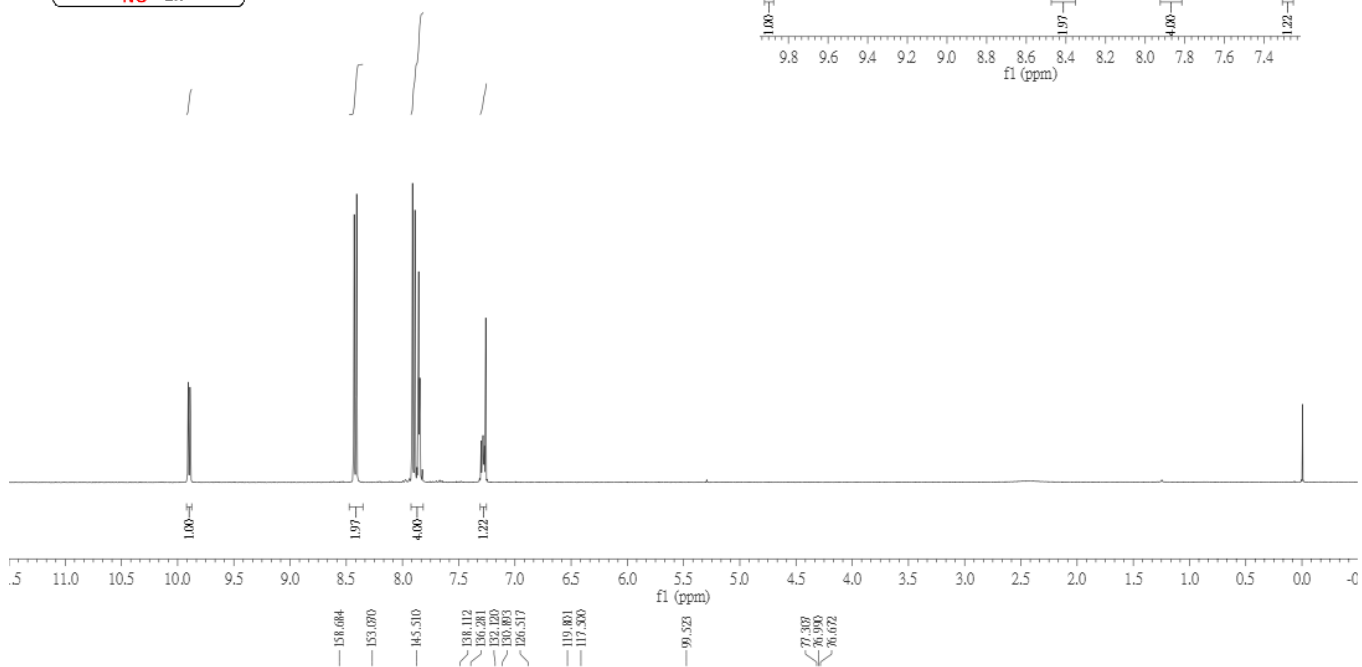

Solvent  $\text{CDCl}_3$   
 Spectrometer Frequency 100.69  
 Nucleus  $^{13}\text{C}$

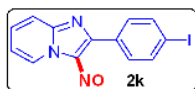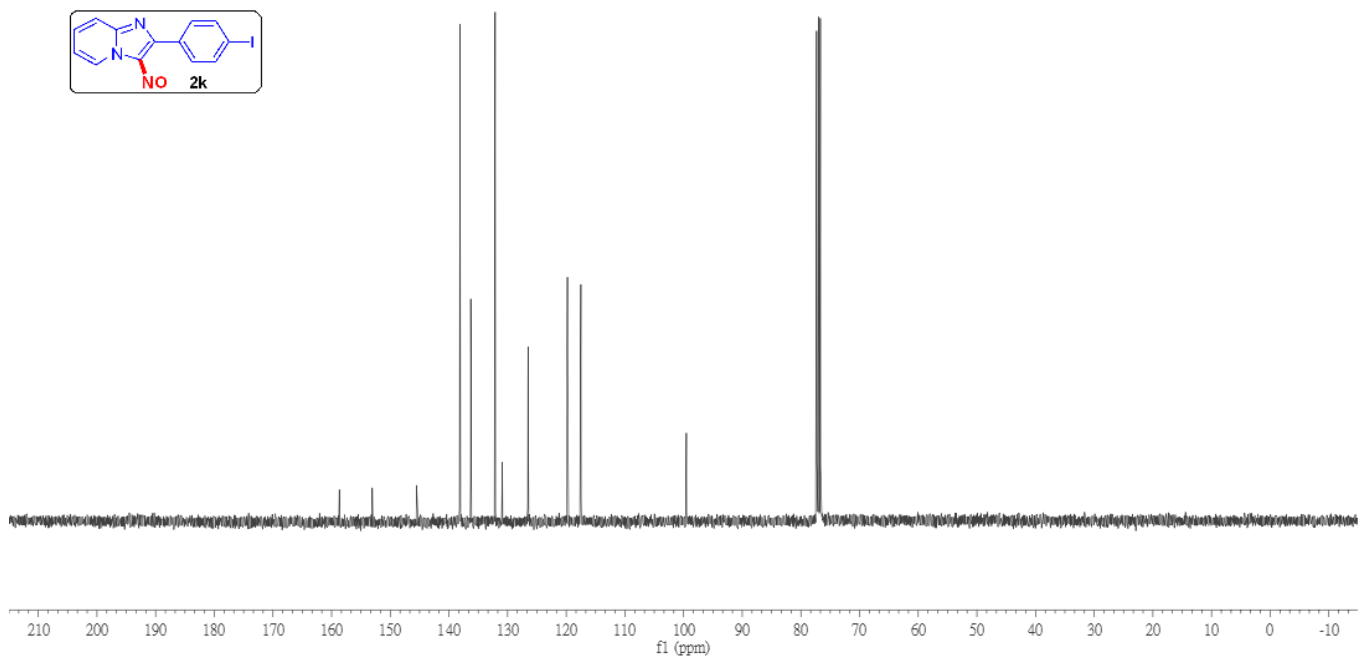

Solvent  $\text{CDCl}_3$   
 Spectrometer Frequency 400.40  
 Nucleus  $^1\text{H}$

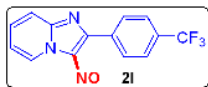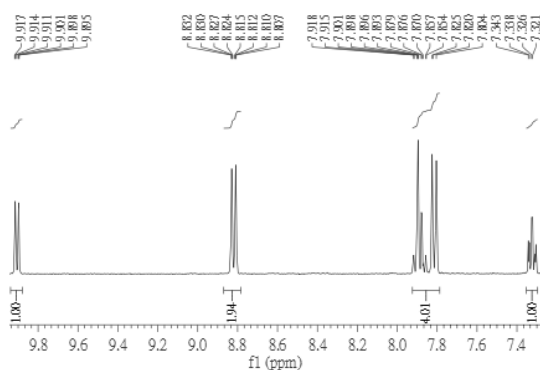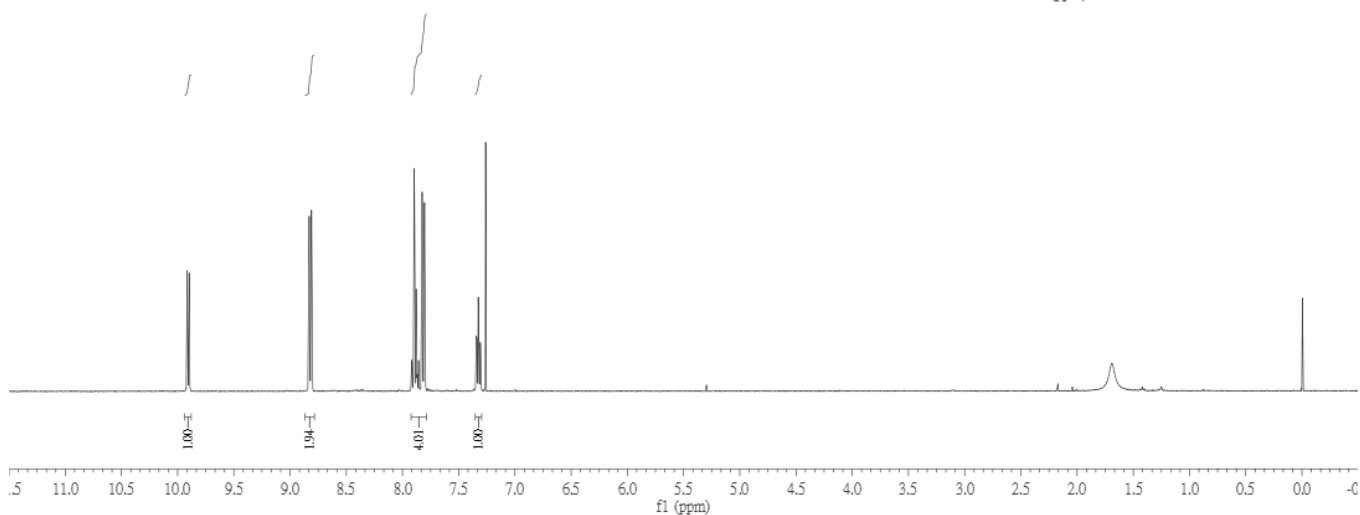

Solvent  $\text{CDCl}_3$   
 Spectrometer Frequency 100.69  
 Nucleus  $^{13}\text{C}$

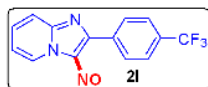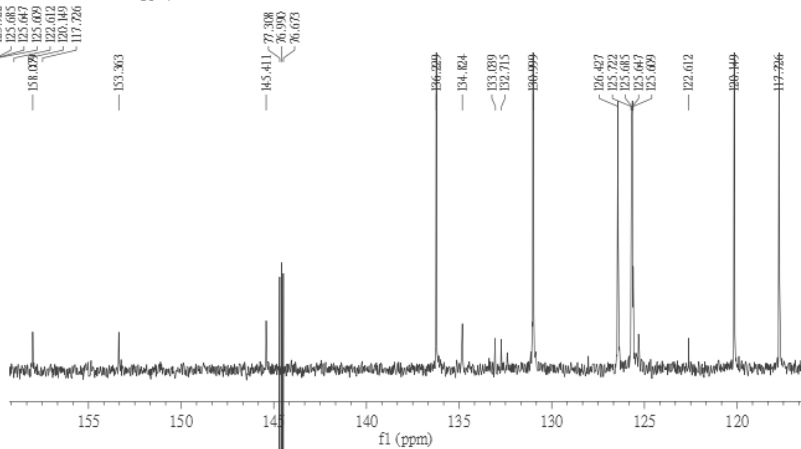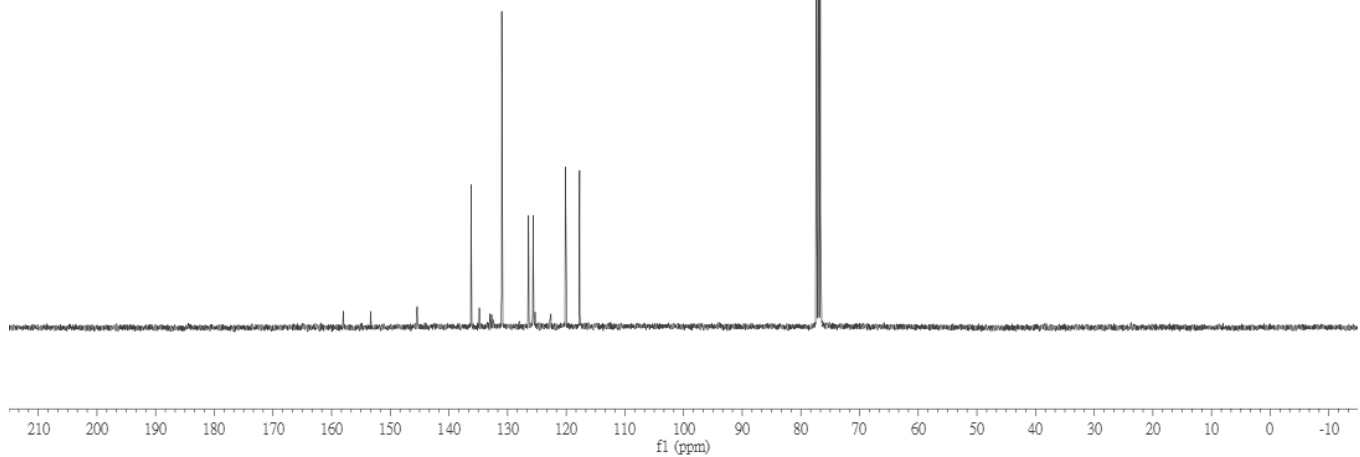

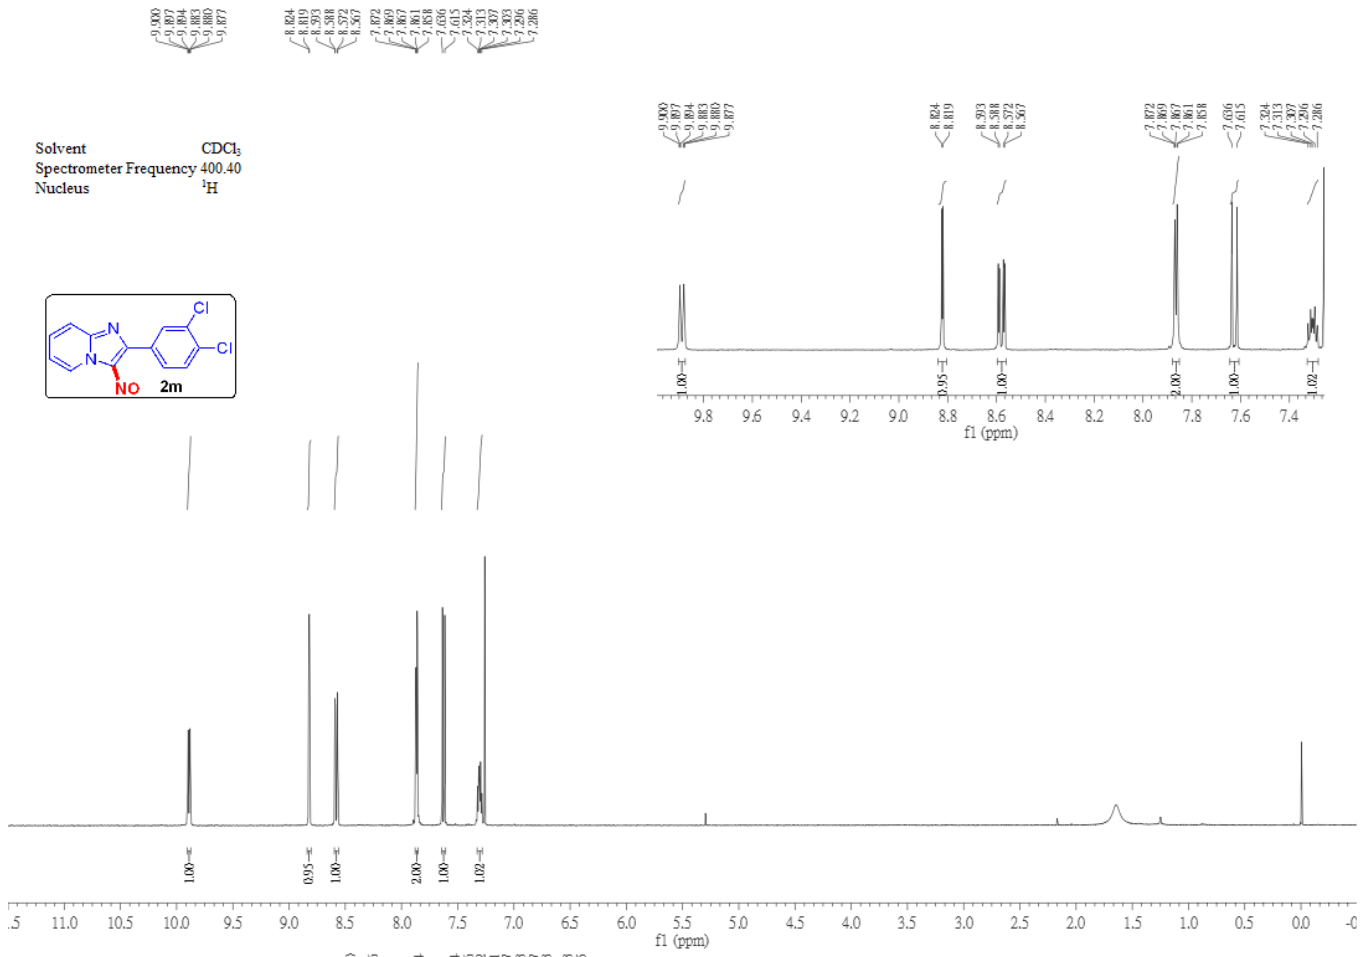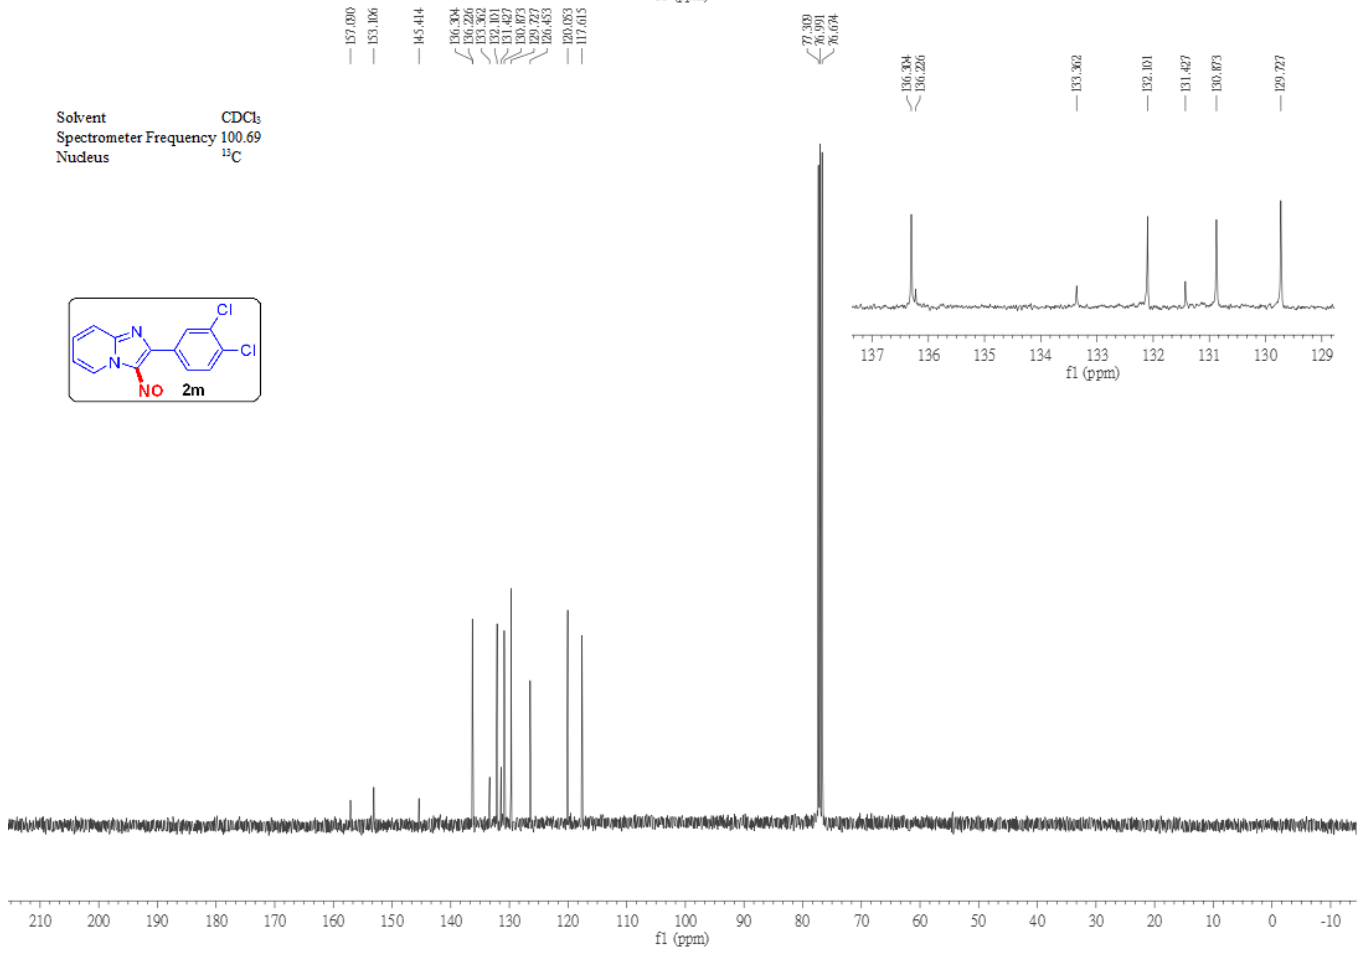

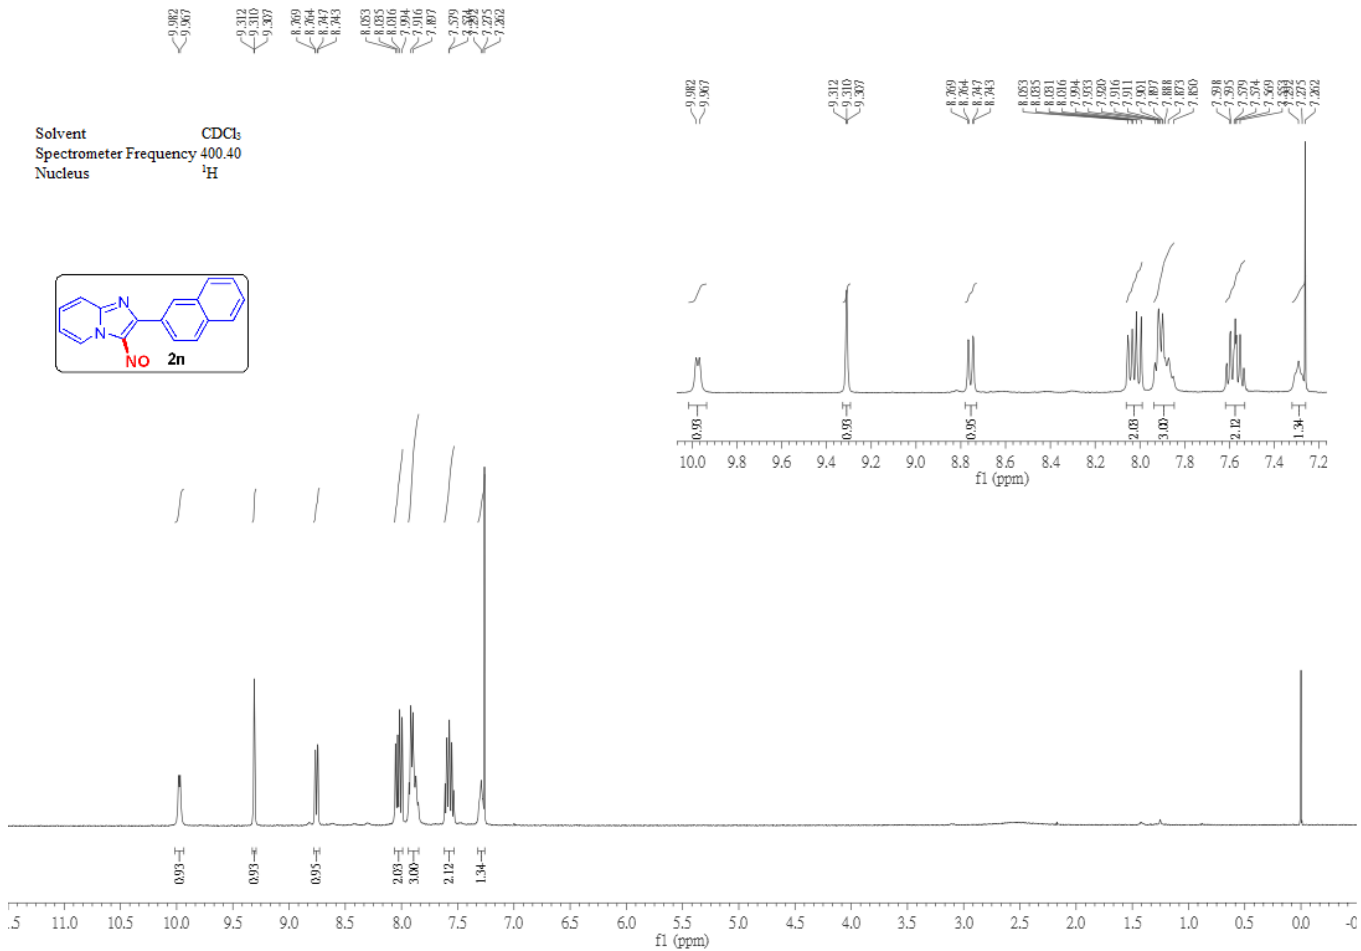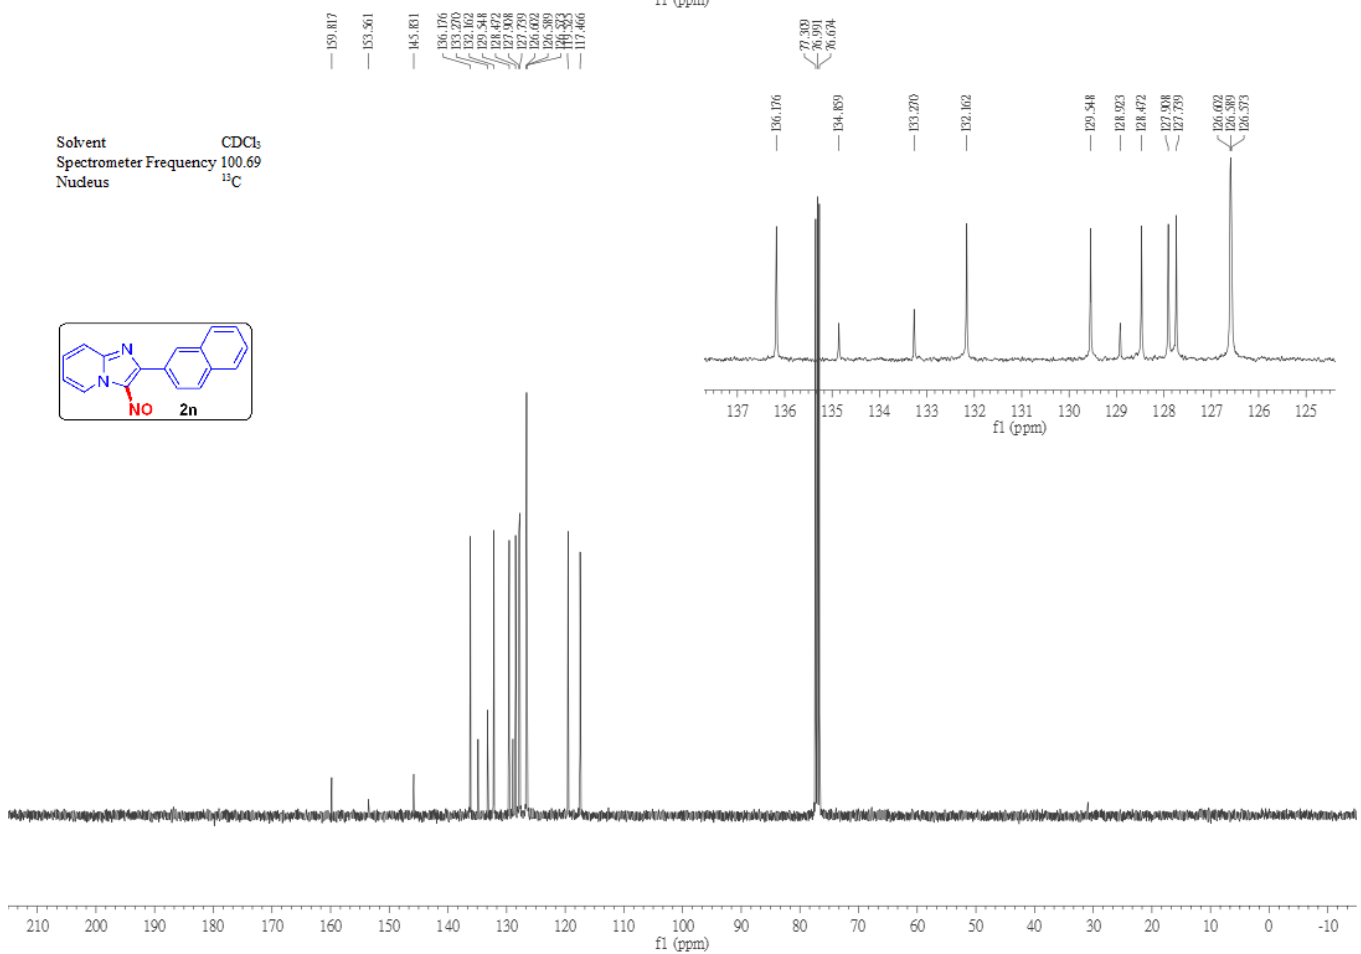

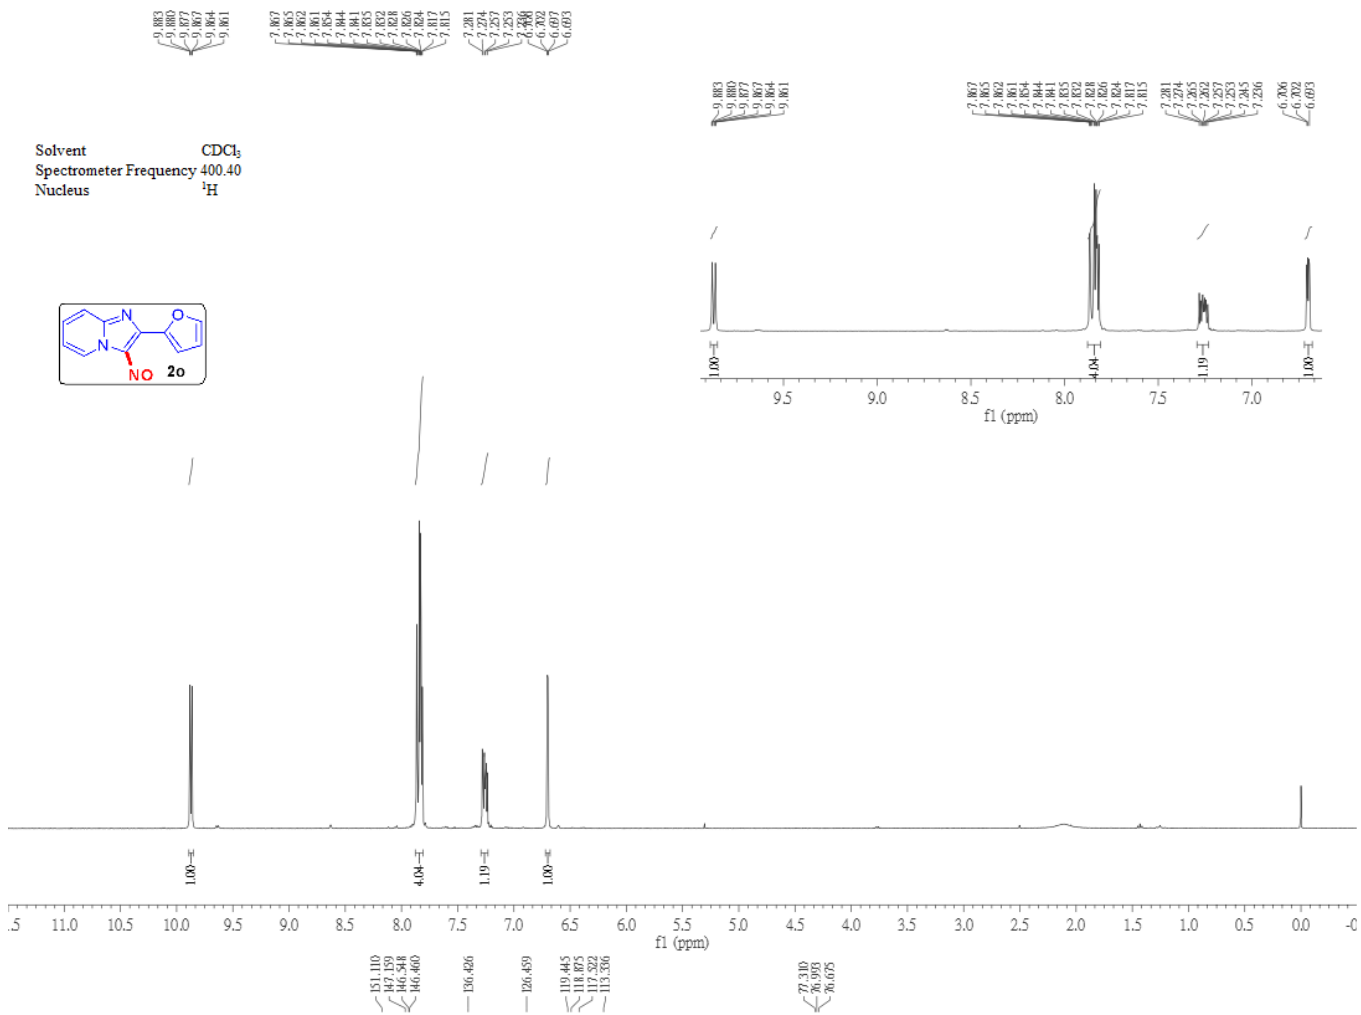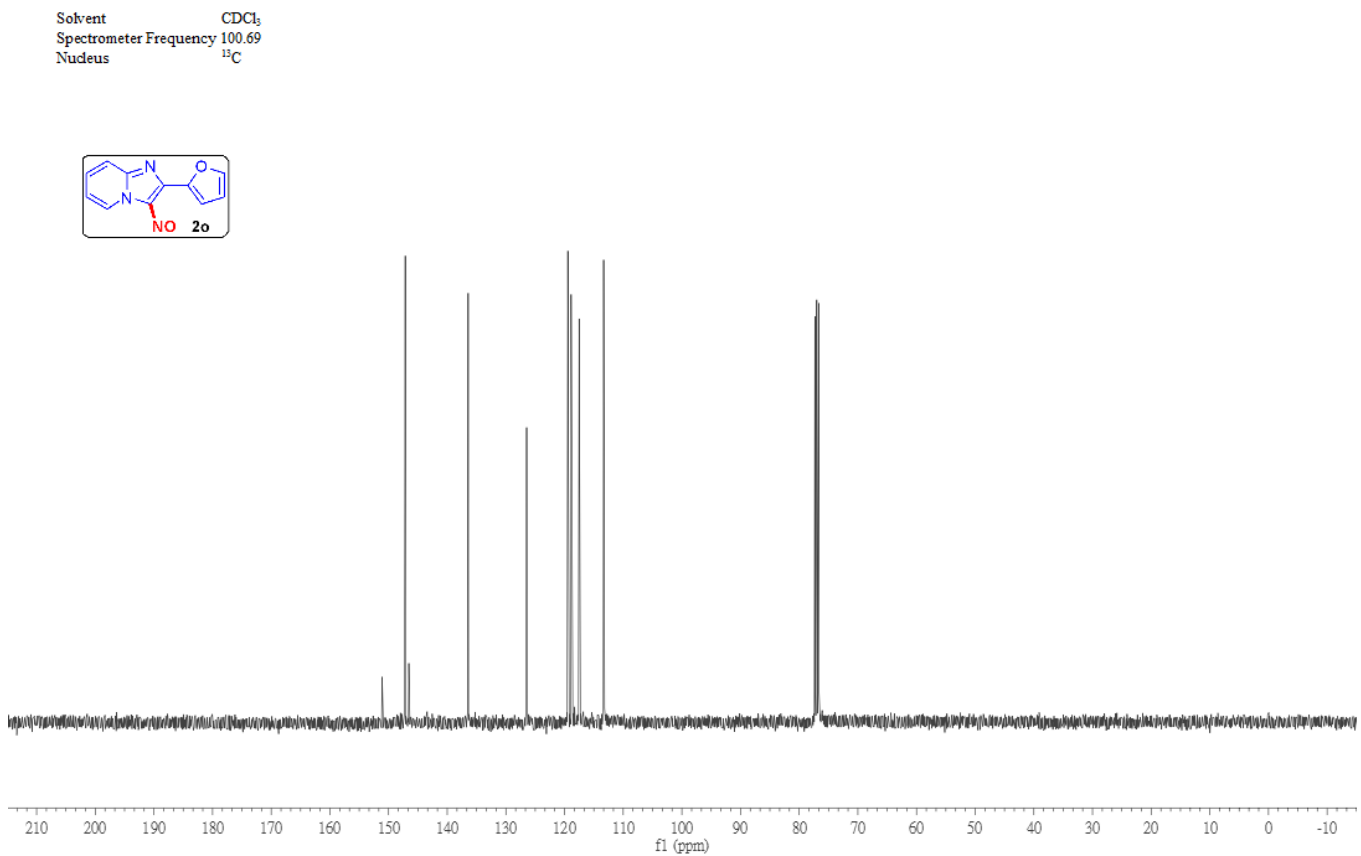



Solvent  $\text{CDCl}_3$   
 Spectrometer Frequency 400.40  
 Nucleus  $^1\text{H}$

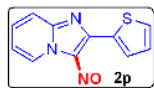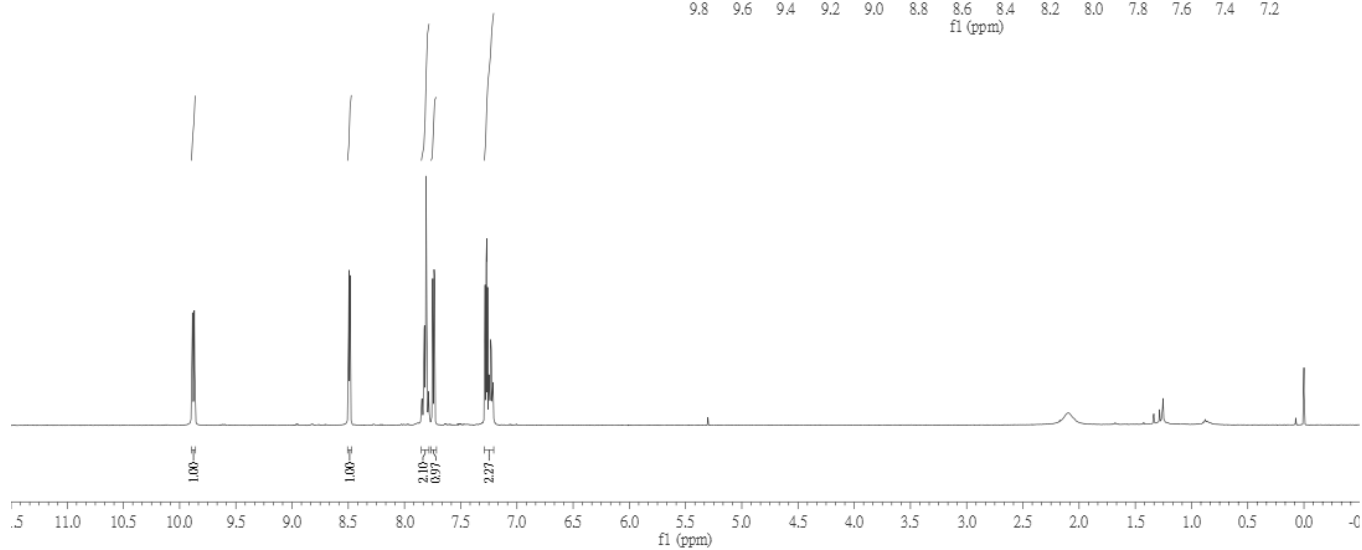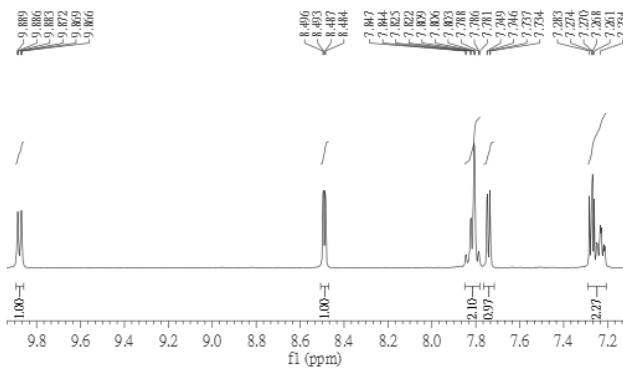

Solvent  $\text{CDCl}_3$   
 Spectrometer Frequency 100.69  
 Nucleus  $^{13}\text{C}$

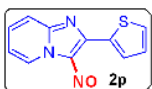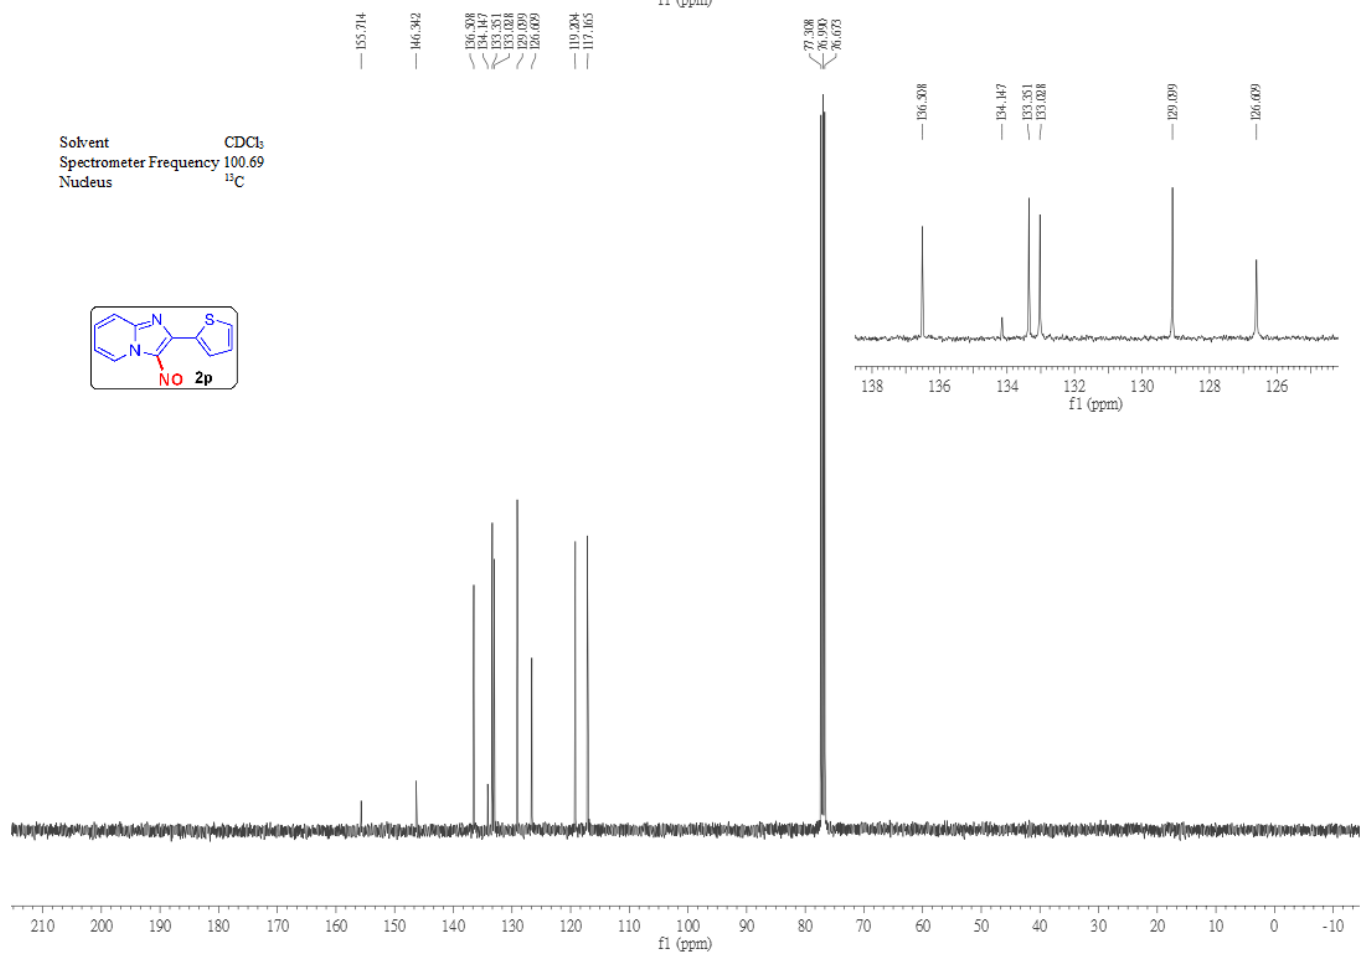

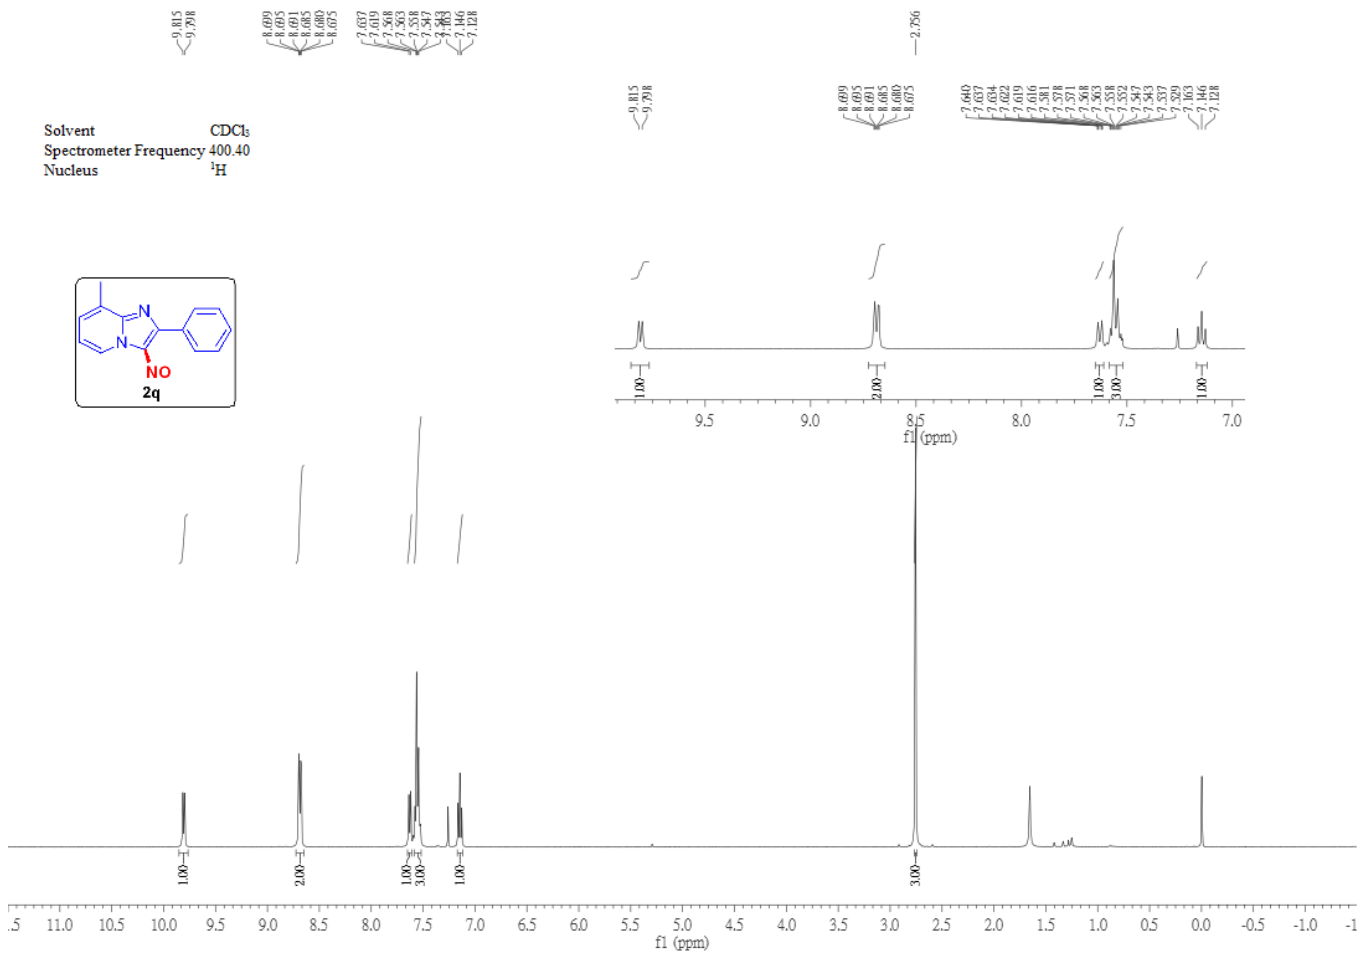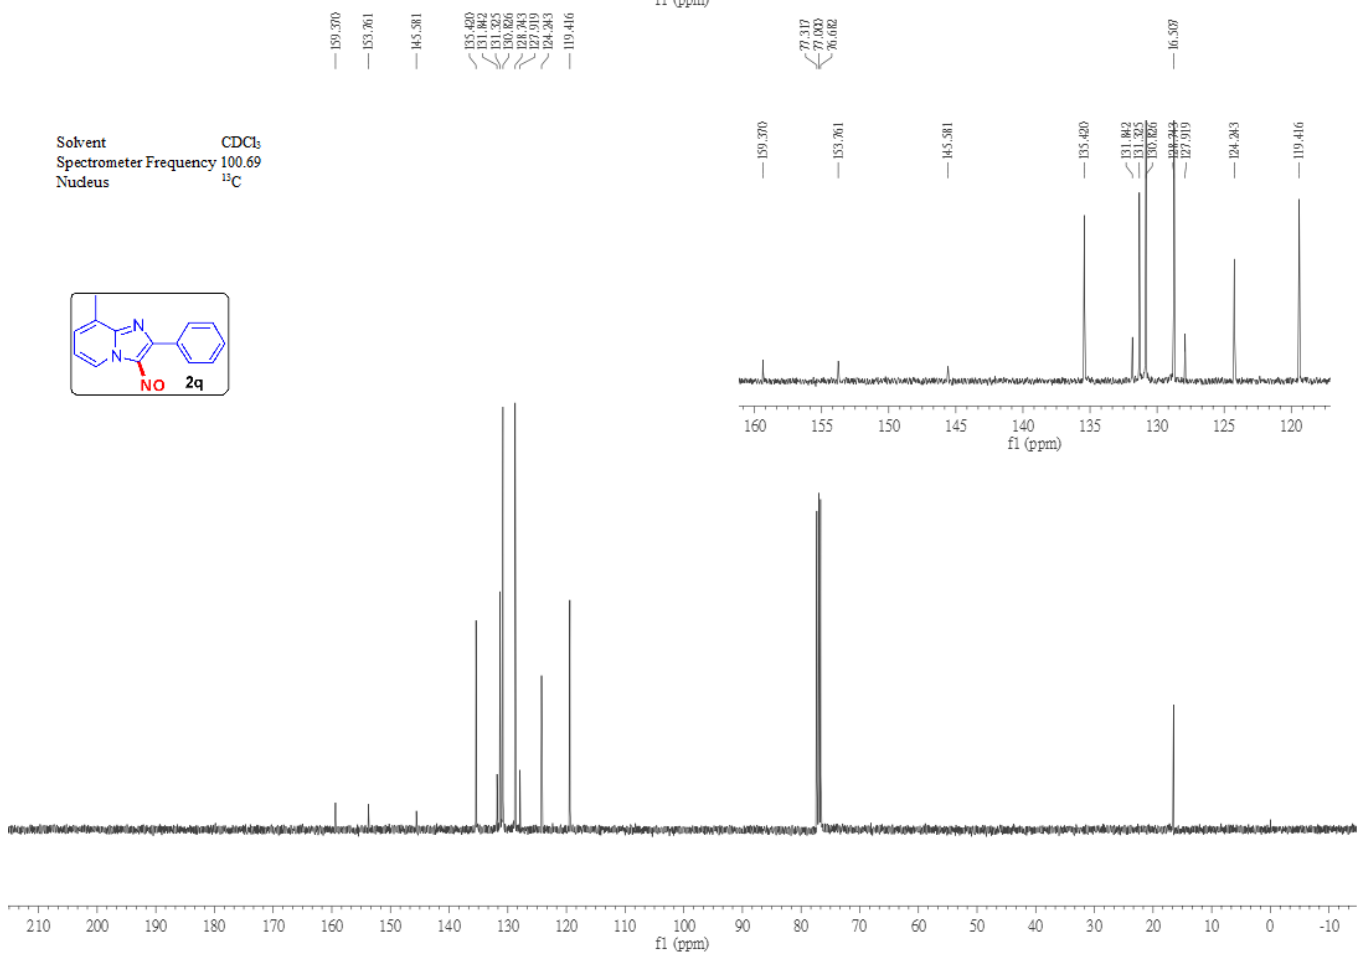

Solvent  $\text{CDCl}_3$   
 Spectrometer Frequency 400.40  
 Nucleus  $^1\text{H}$

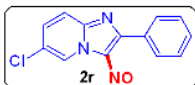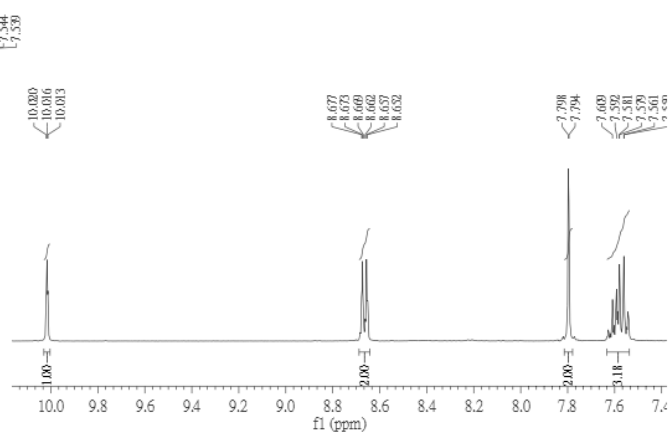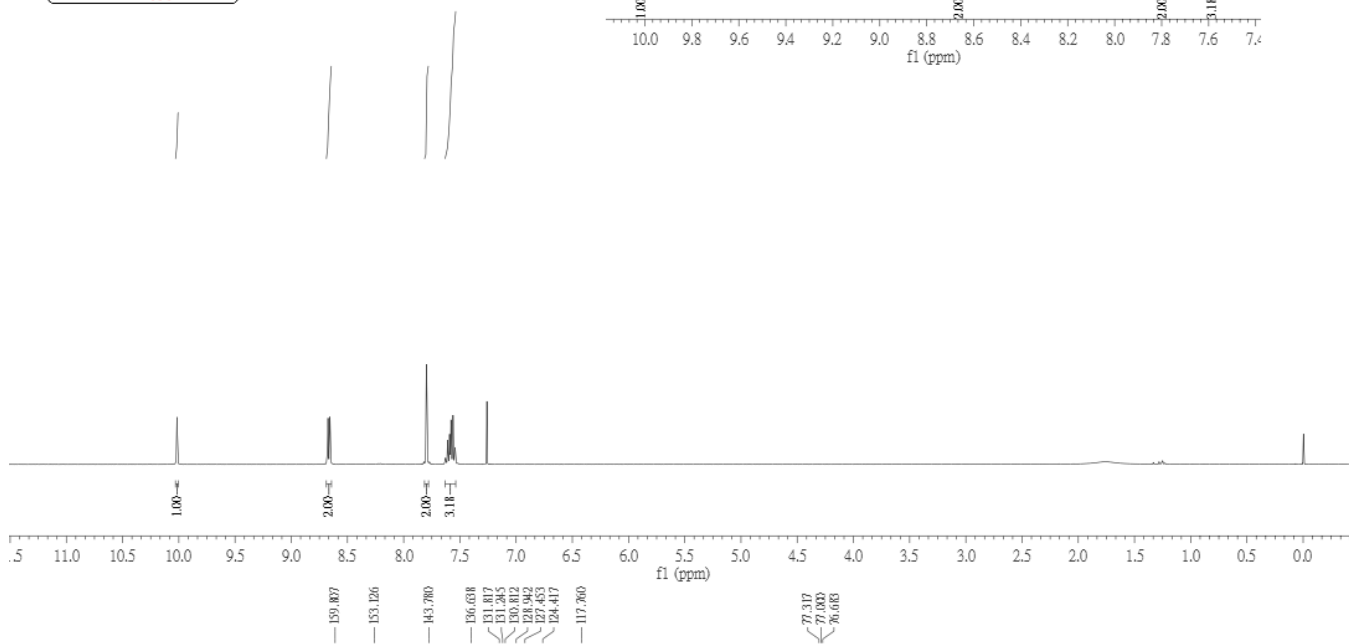

Solvent  $\text{CDCl}_3$   
 Spectrometer Frequency 100.69  
 Nucleus  $^{13}\text{C}$

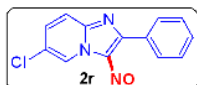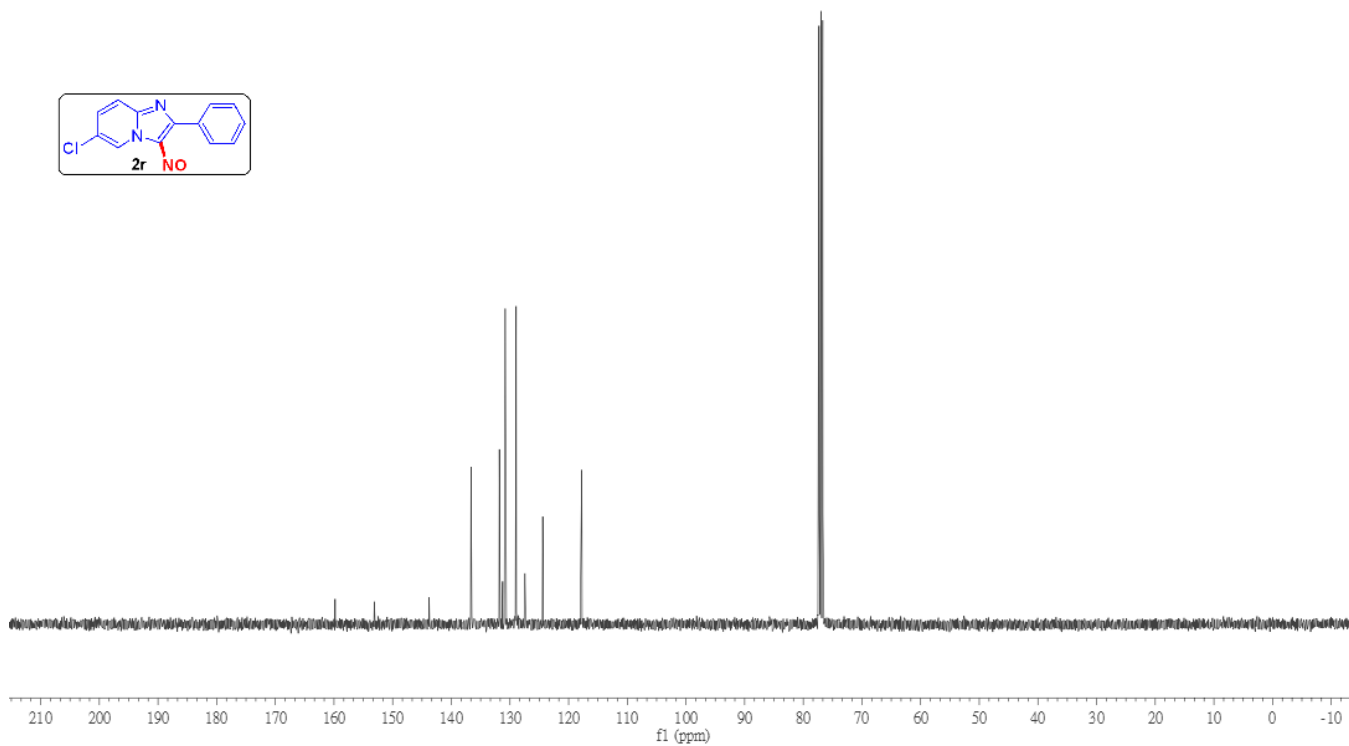

Solvent  $\text{CDCl}_3$   
 Spectrometer Frequency 400.40  
 Nucleus  $^1\text{H}$

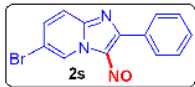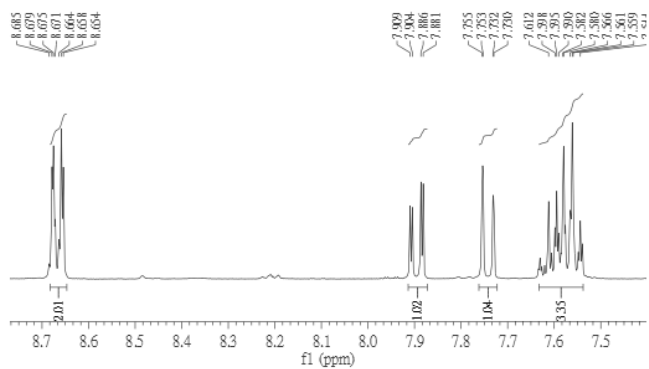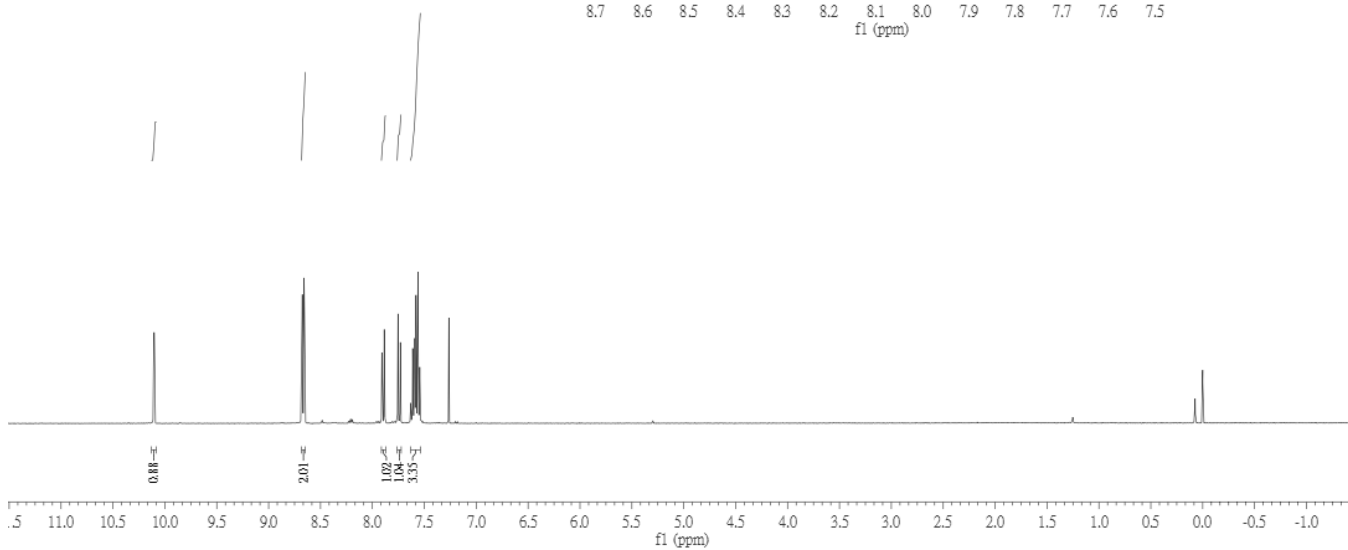

Solvent  $\text{CDCl}_3$   
 Spectrometer Frequency 100.69  
 Nucleus  $^{13}\text{C}$

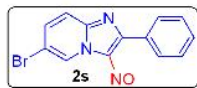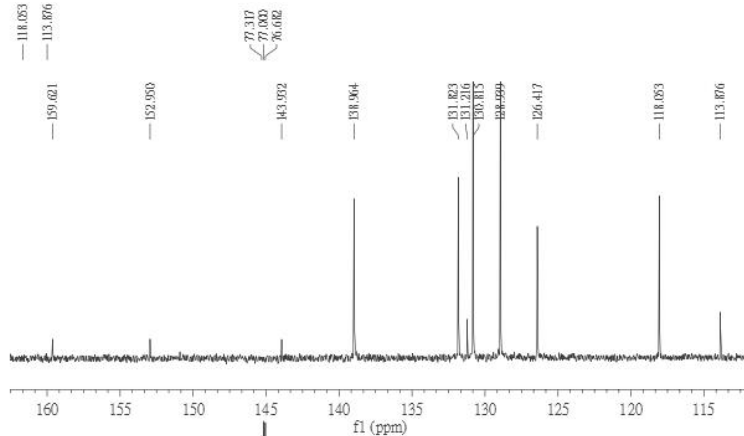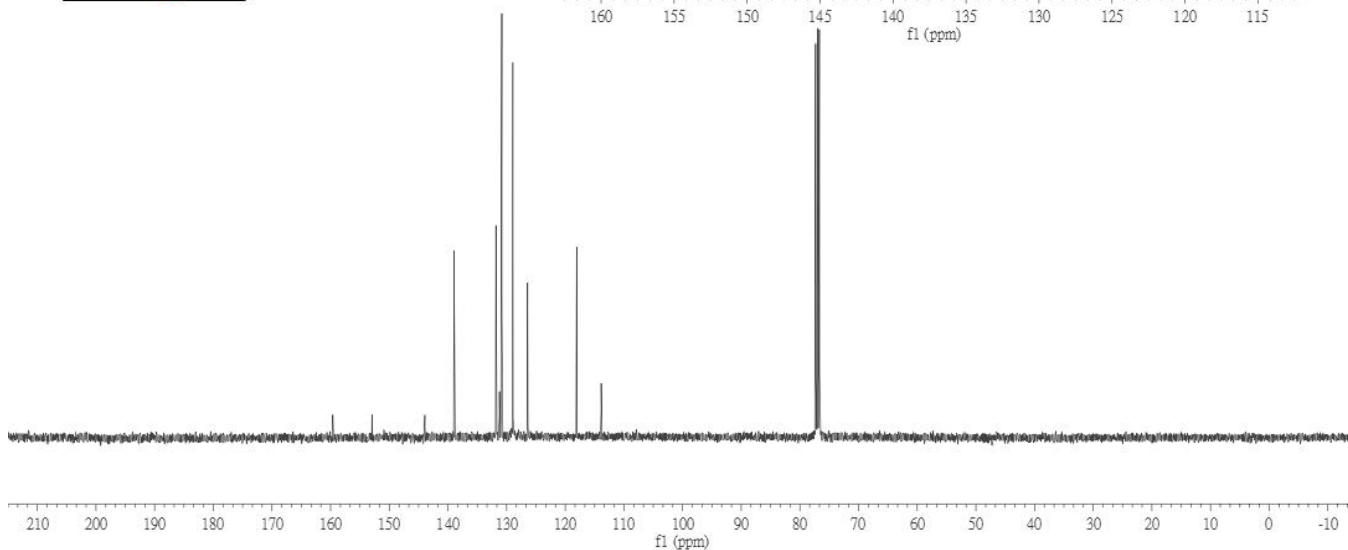

Solvent  $\text{CDCl}_3$   
 Spectrometer Frequency 400.40  
 Nucleus  $^1\text{H}$

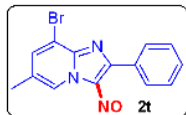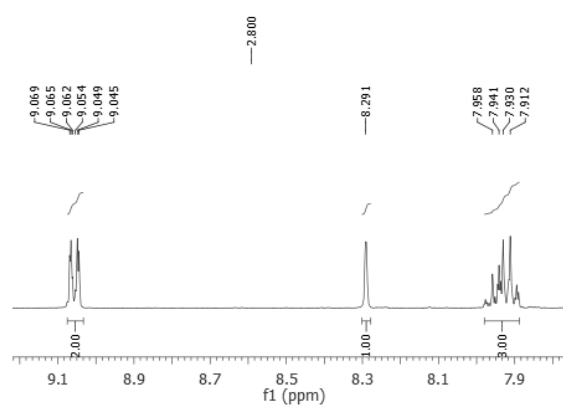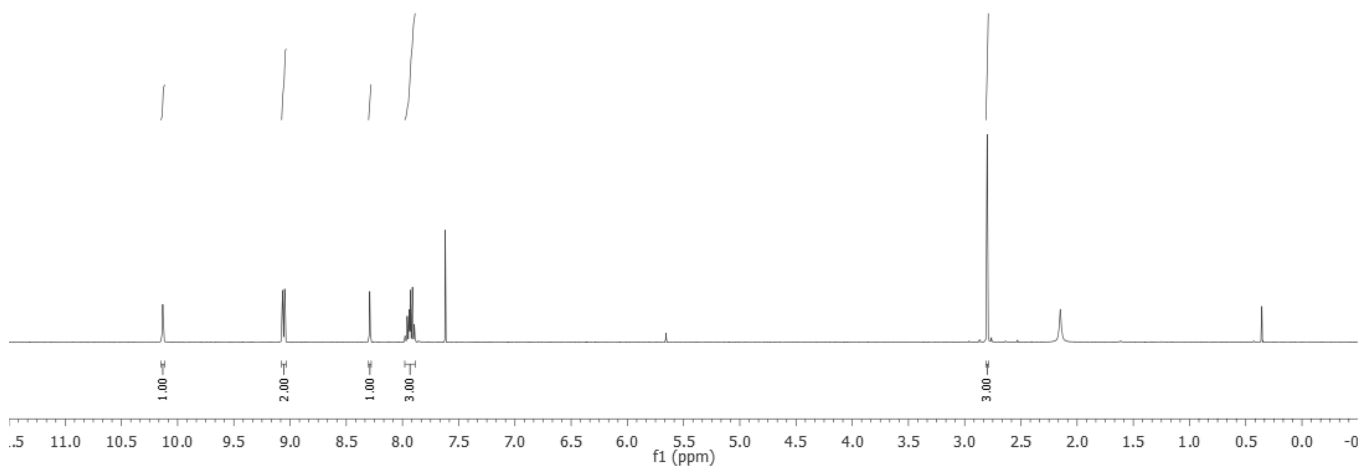

Solvent  $\text{CDCl}_3$   
 Spectrometer Frequency 100.69  
 Nucleus  $^{13}\text{C}$

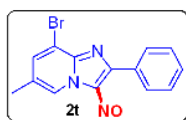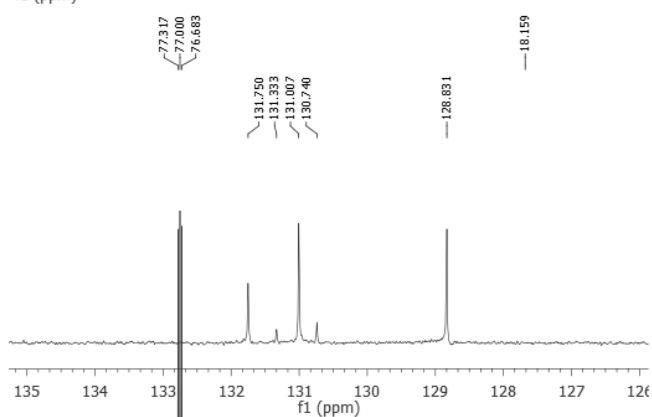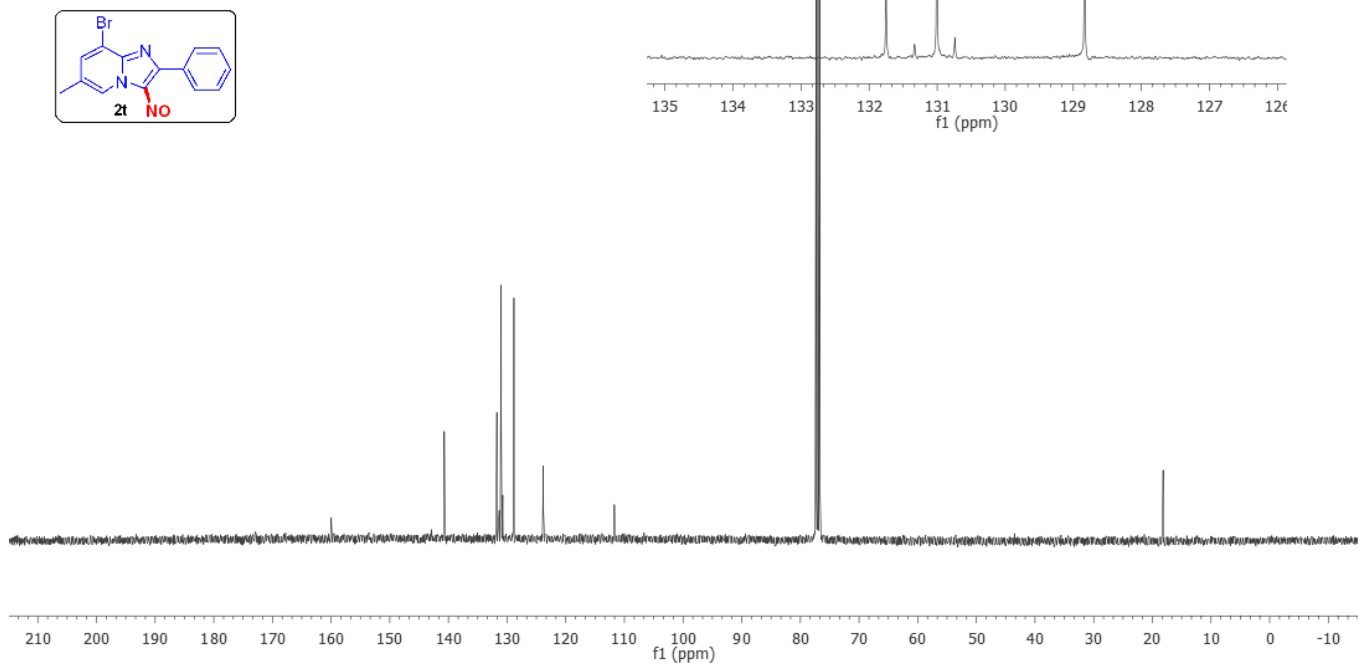

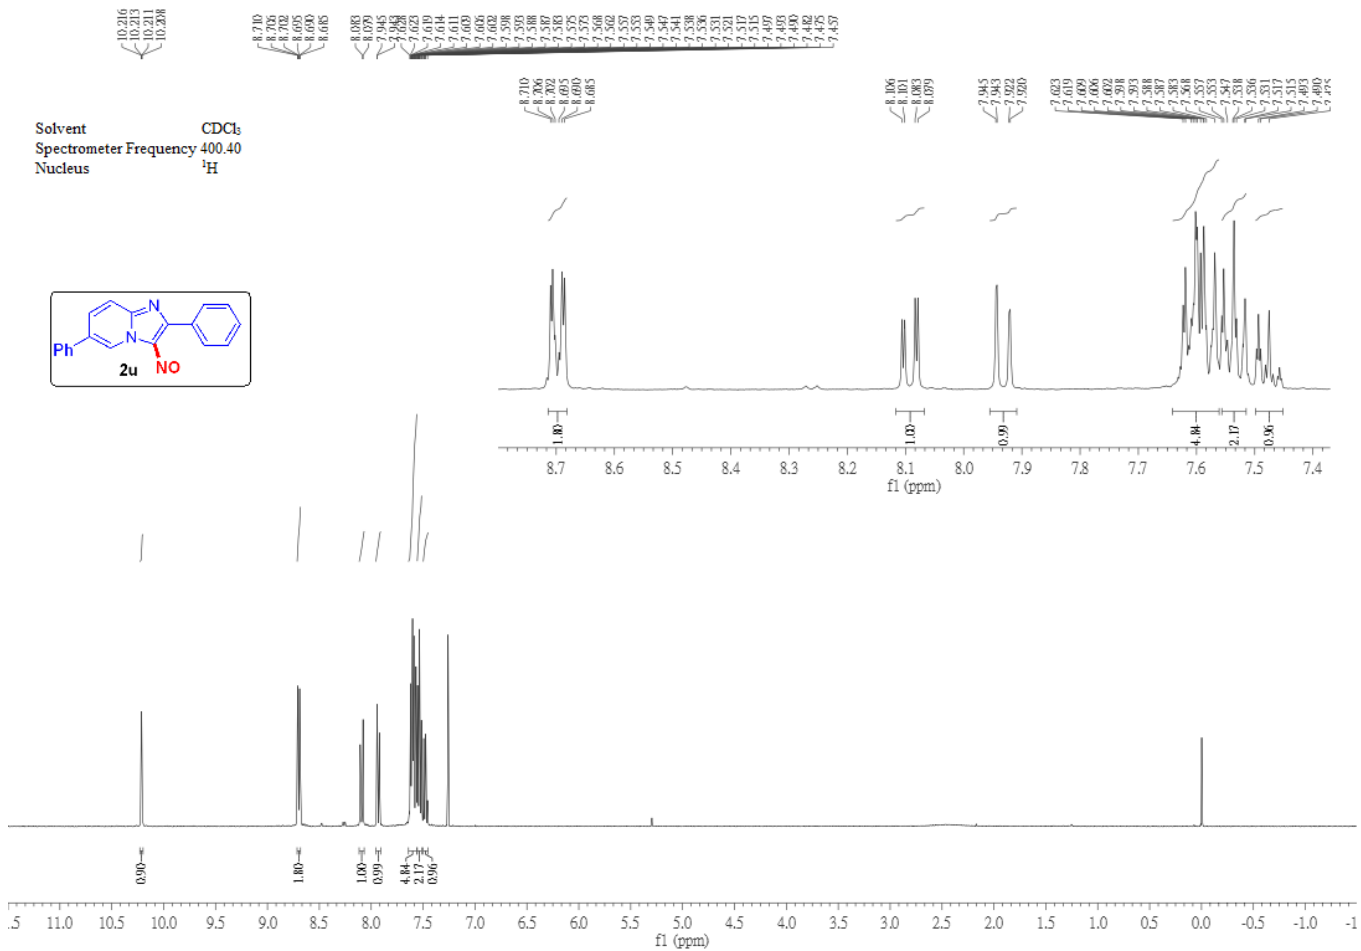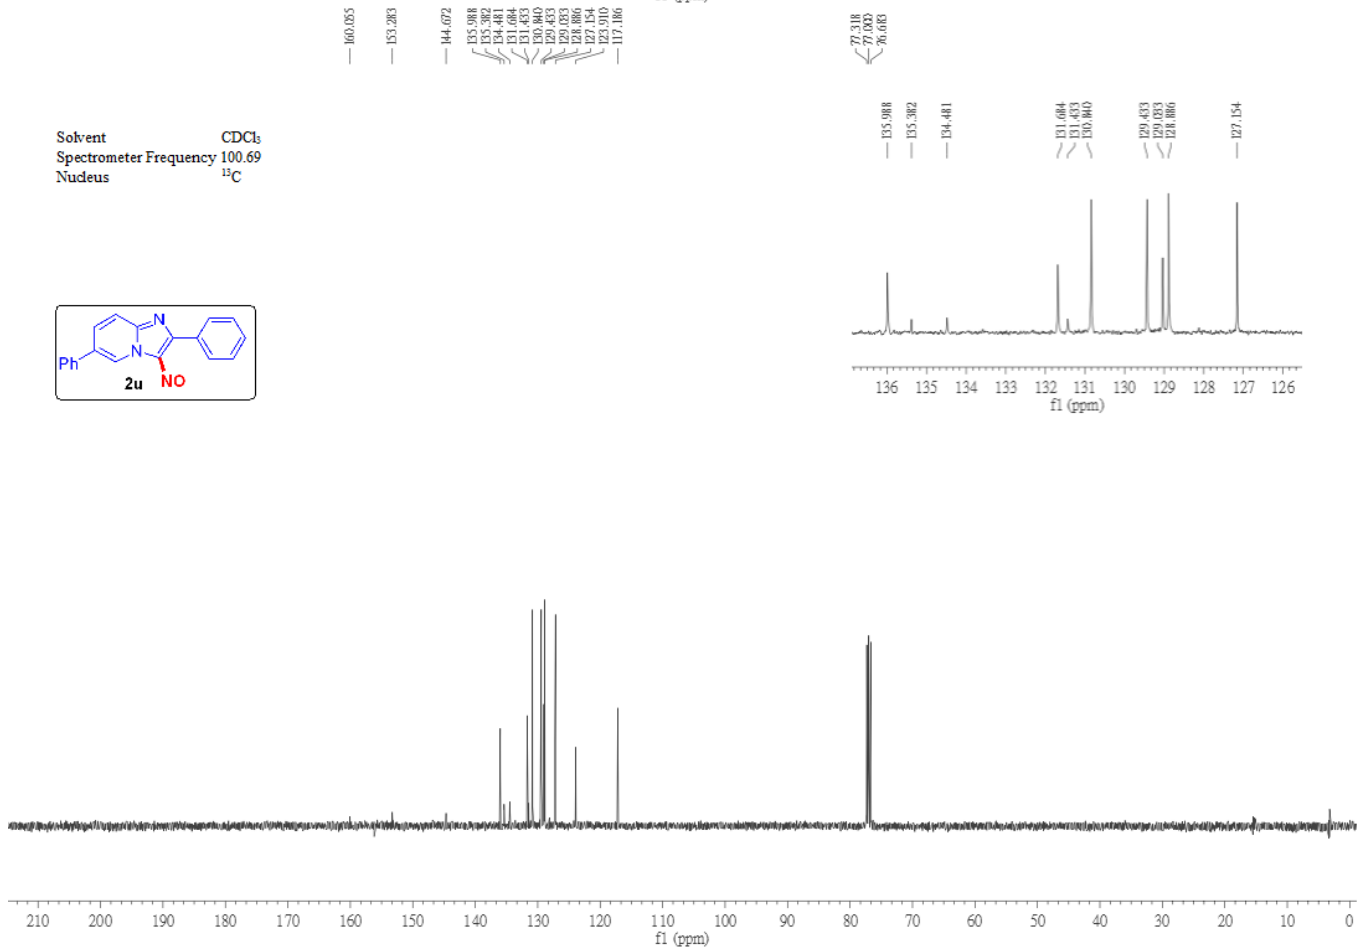

Solvent  $\text{CDCl}_3$   
 Spectrometer Frequency 400.40  
 Nucleus  $^1\text{H}$

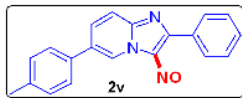

10.212  
10.210  
8.721  
8.702  
8.114  
8.110  
8.092  
8.064  
7.942  
7.618  
7.602  
7.595  
7.579  
7.572  
7.517  
7.509  
7.482  
7.468  
7.333  
7.333  
7.260

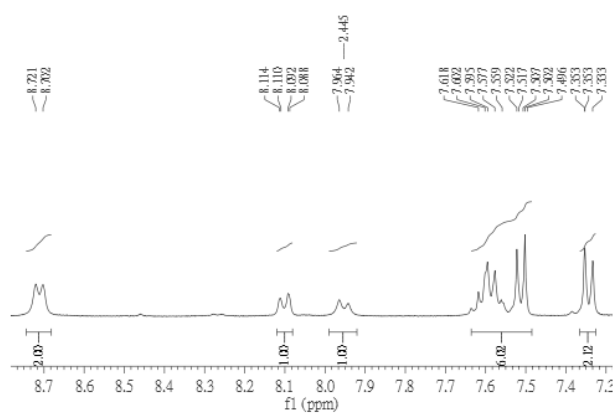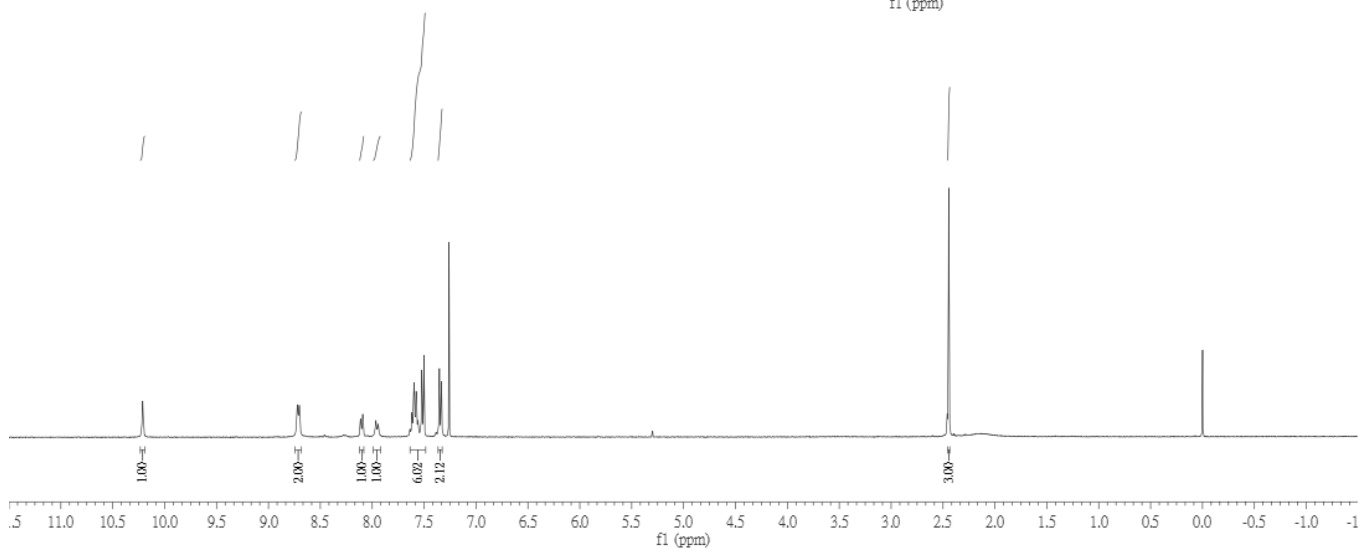

Solvent  $\text{CDCl}_3$   
 Spectrometer Frequency 100.69  
 Nucleus  $^{13}\text{C}$

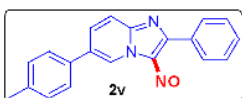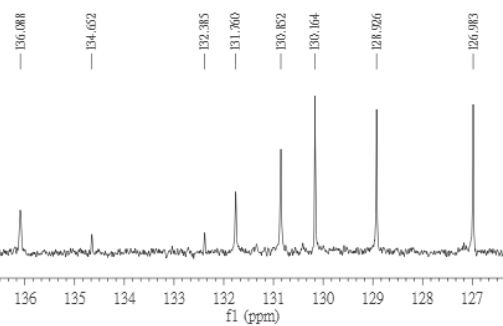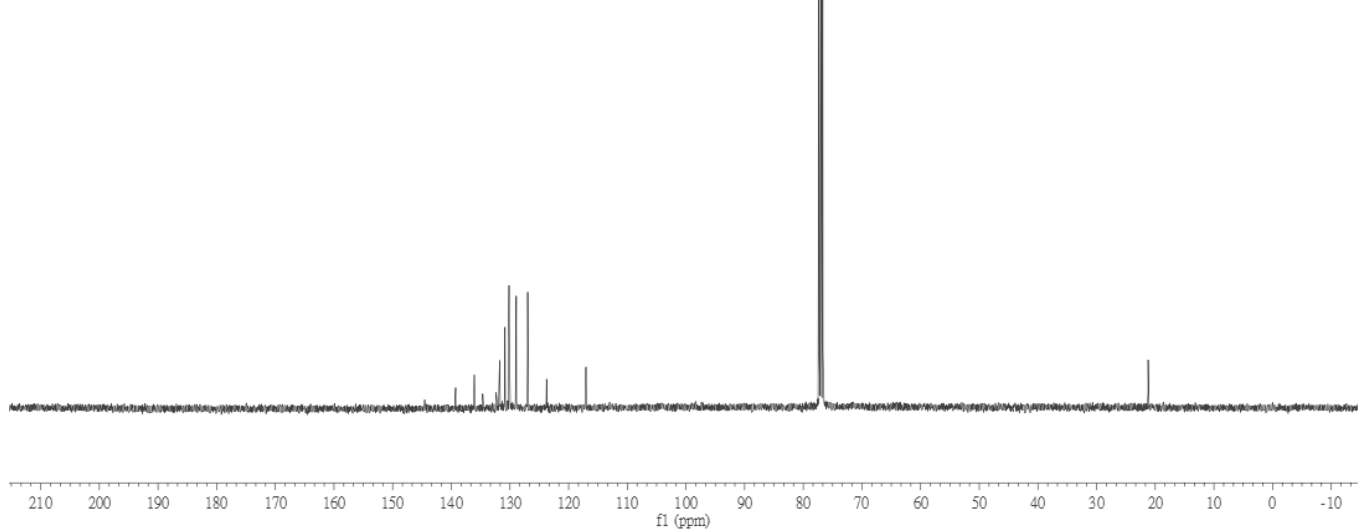

Solvent  $\text{CDCl}_3$   
 Spectrometer Frequency 400.40  
 Nucleus  $^1\text{H}$

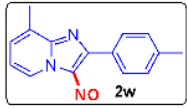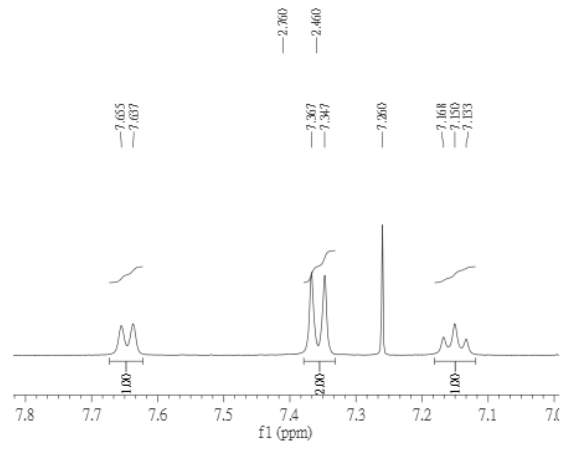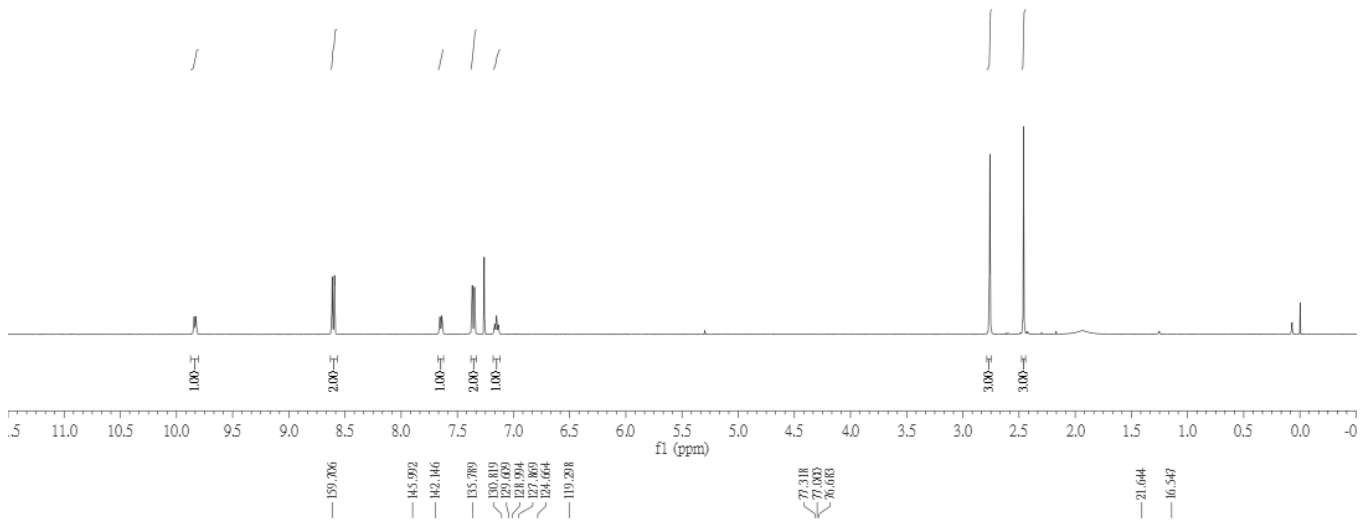

Solvent  $\text{CDCl}_3$   
 Spectrometer Frequency 100.69  
 Nucleus  $^{13}\text{C}$

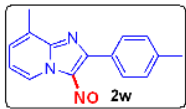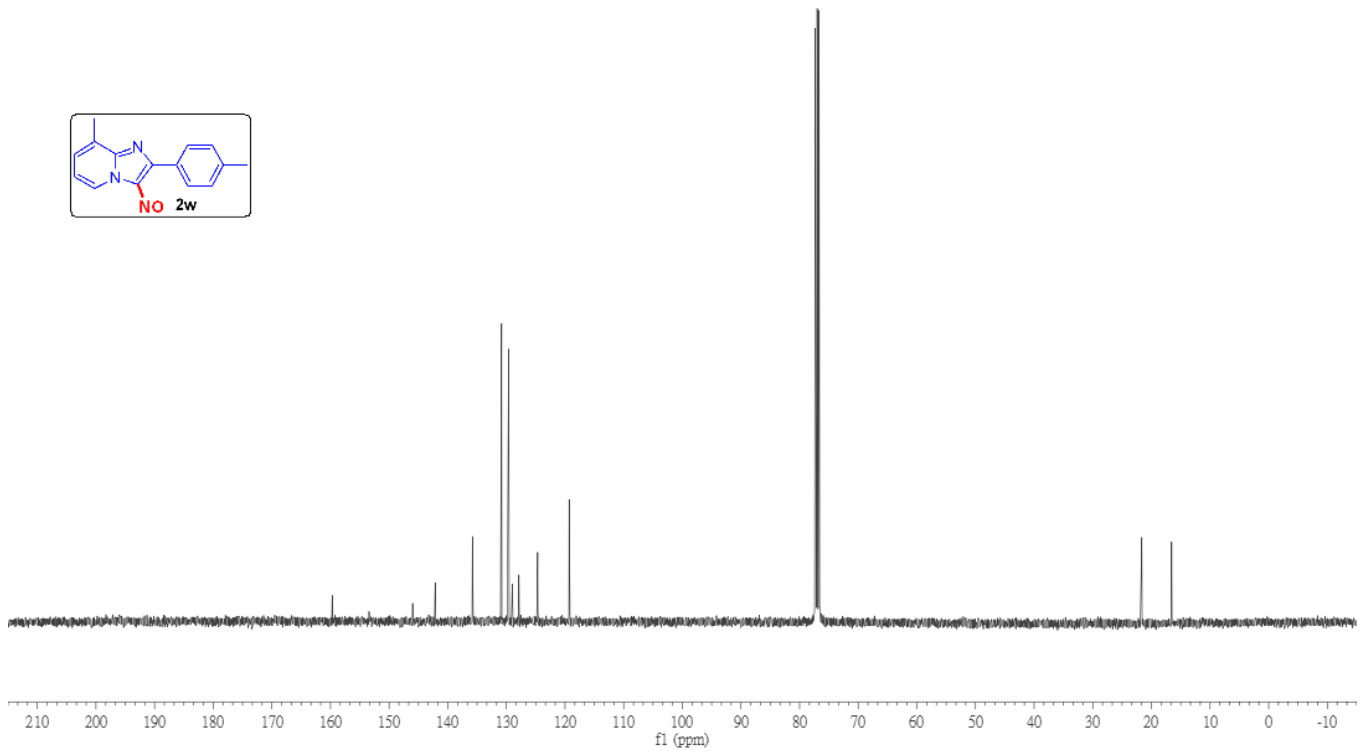



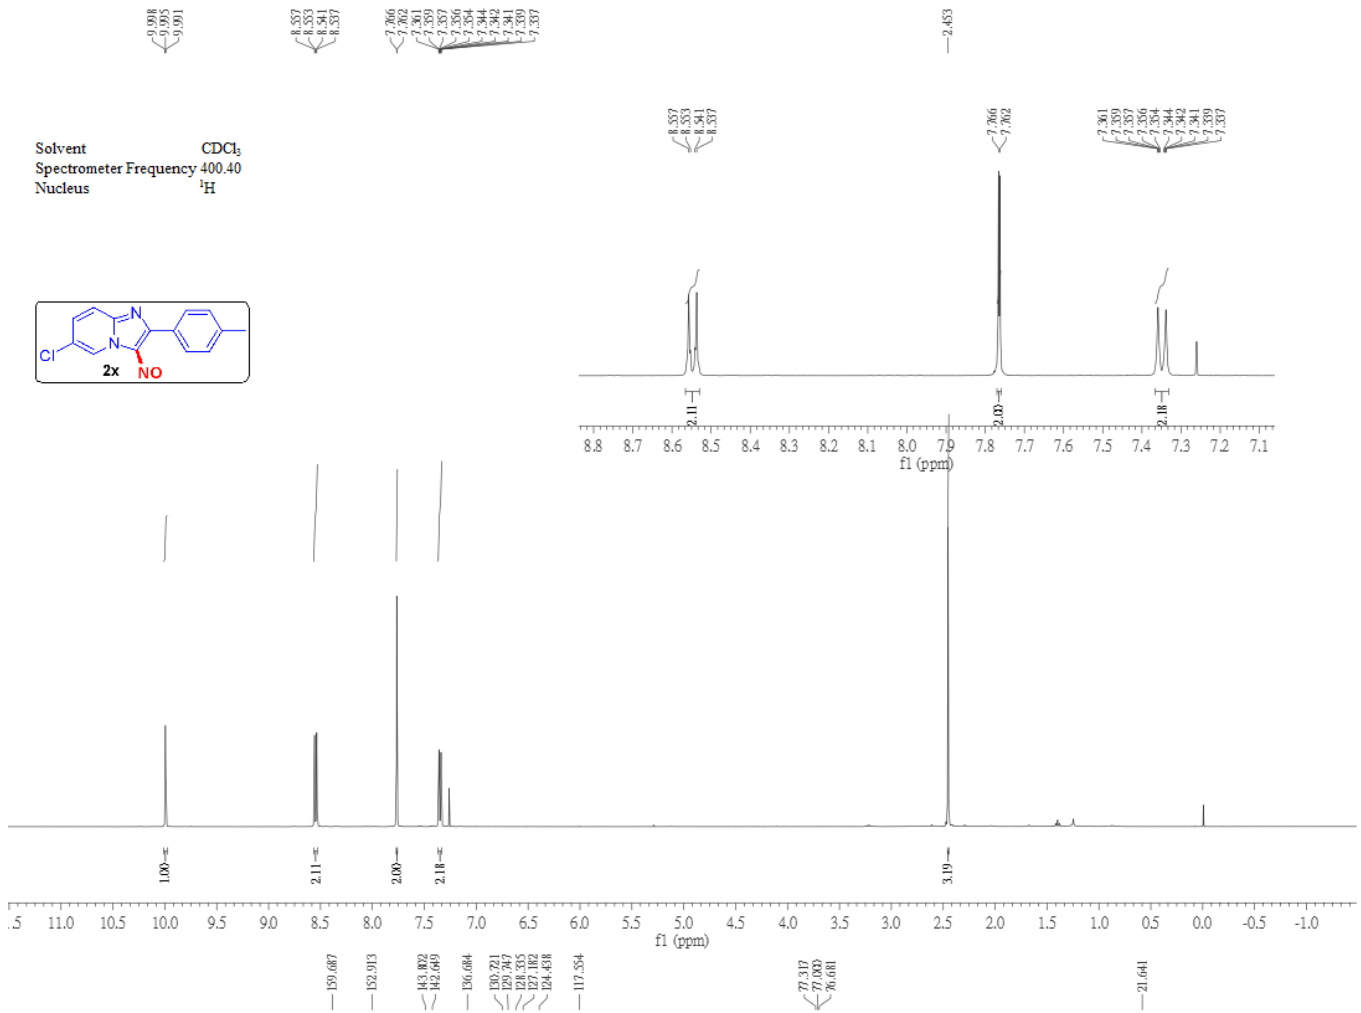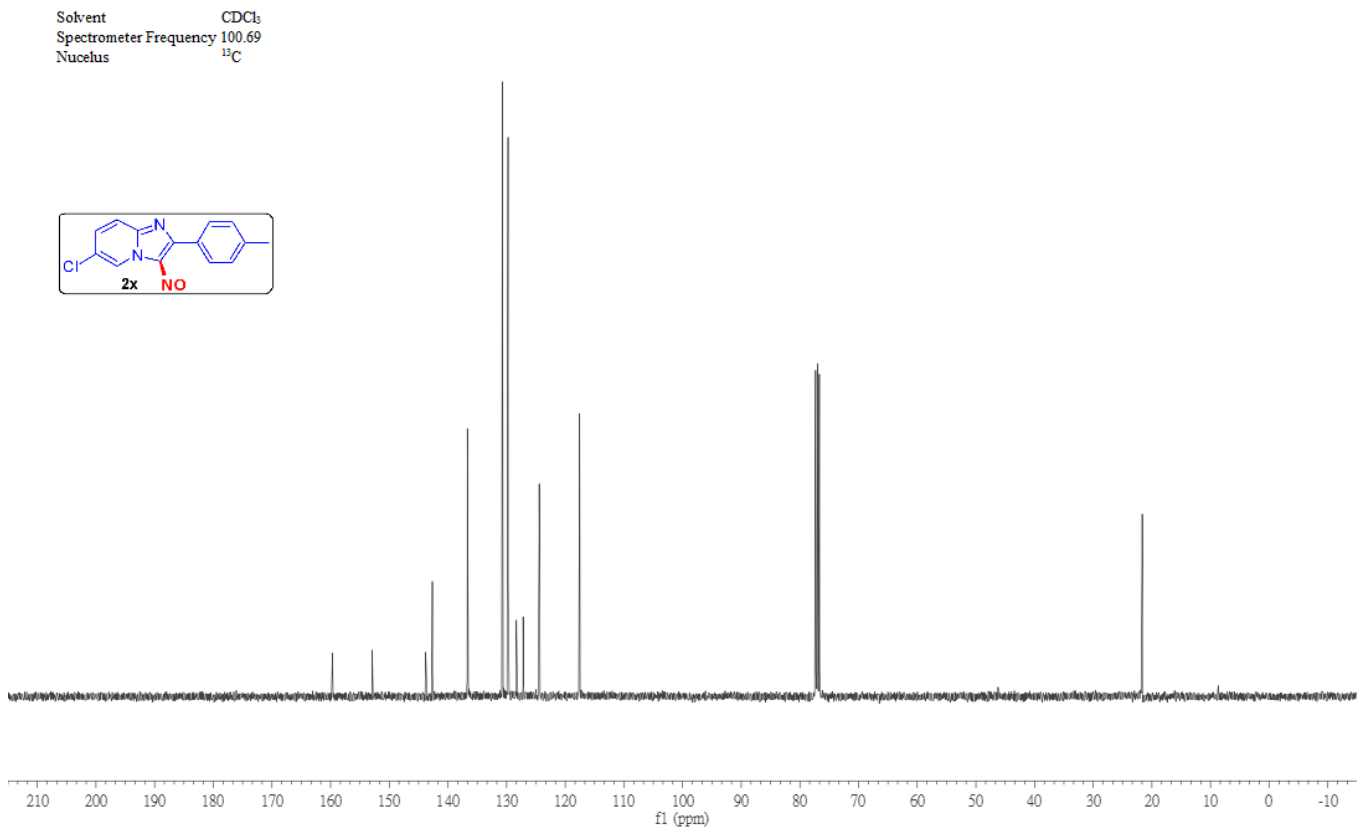

Solvent  $\text{CDCl}_3$   
 Spectrometer Frequency 400.40  
 Nucleus  $^1\text{H}$

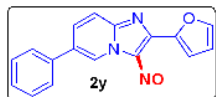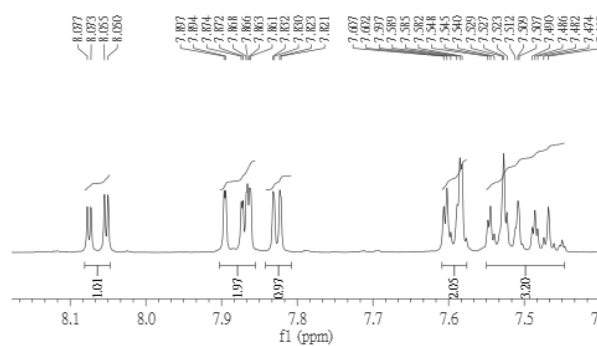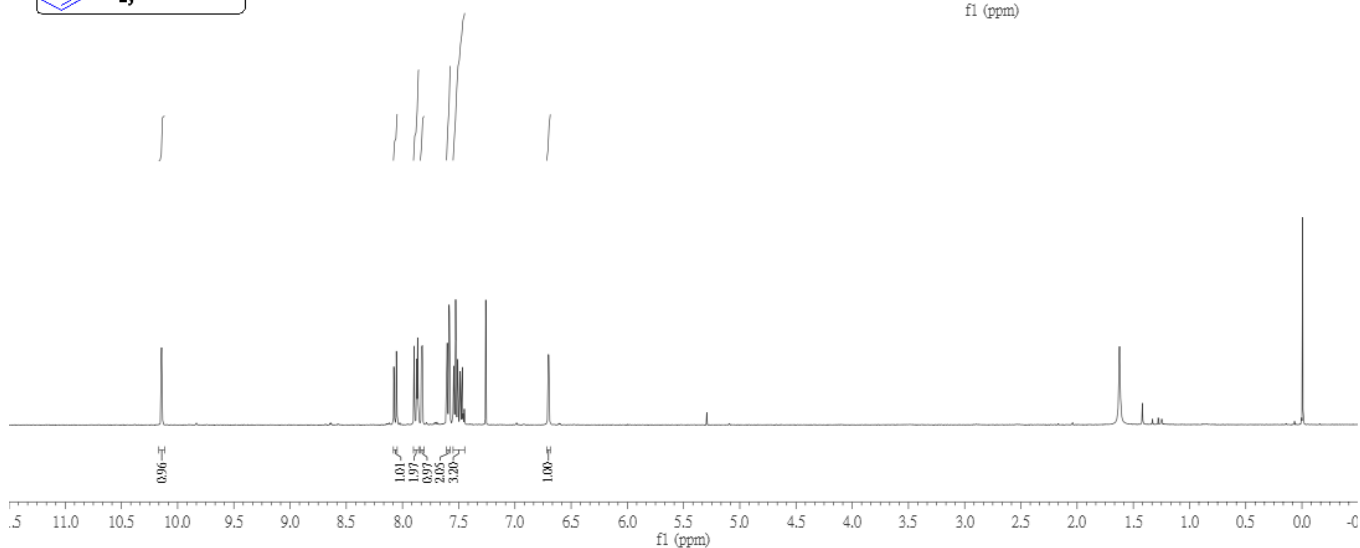

Solvent  $\text{CDCl}_3$   
 Spectrometer Frequency 100.69  
 Nucleus  $^{13}\text{C}$

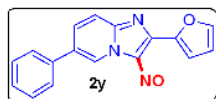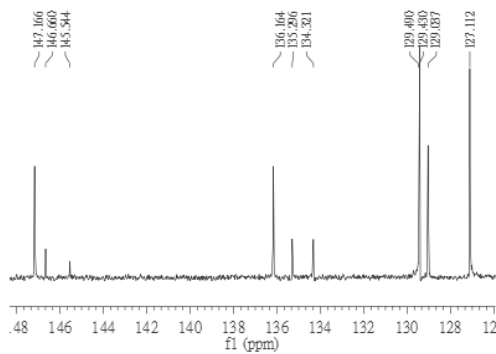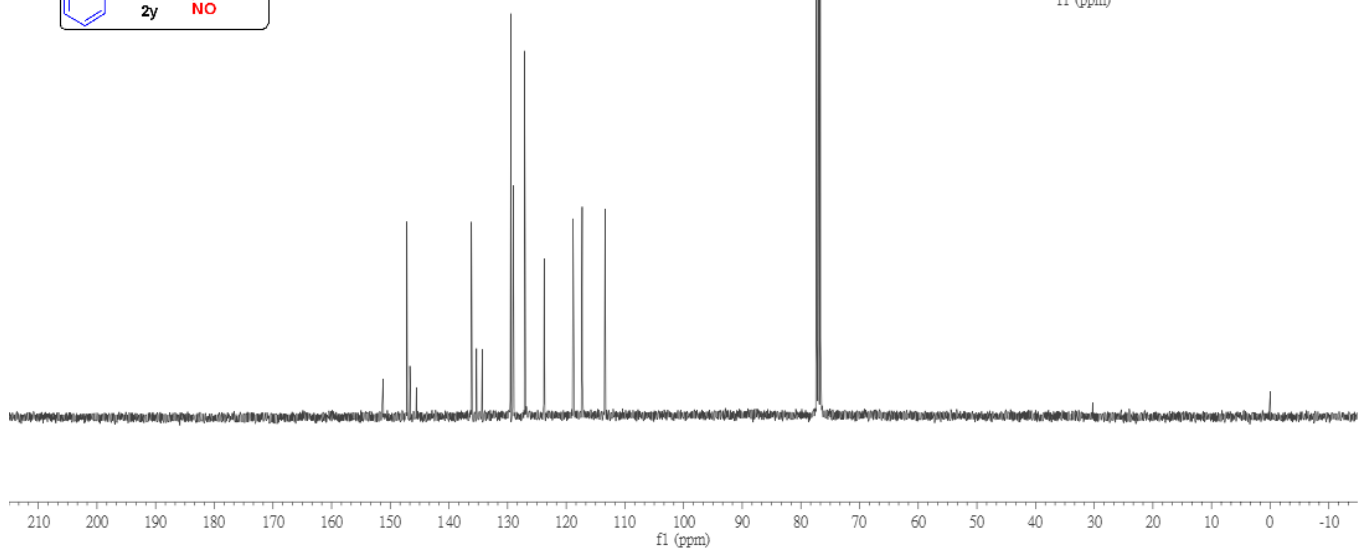

Solvent CDCl<sub>3</sub>  
 Spectrometer Frequency 400.40  
 Nucleus <sup>1</sup>H

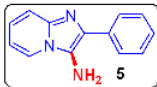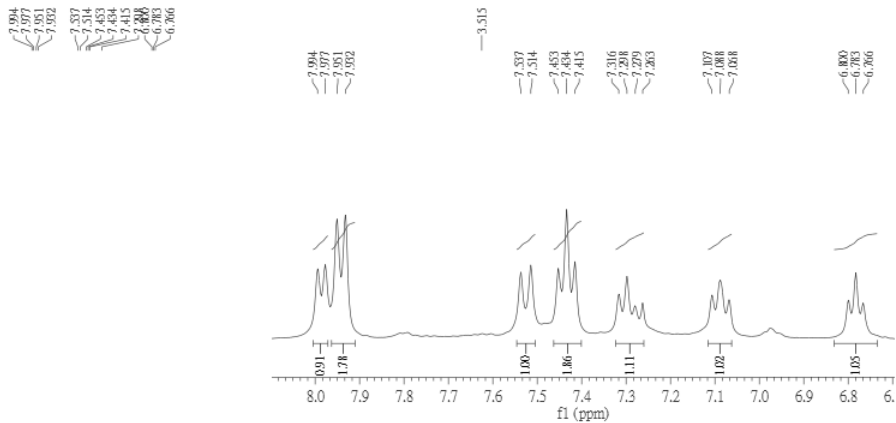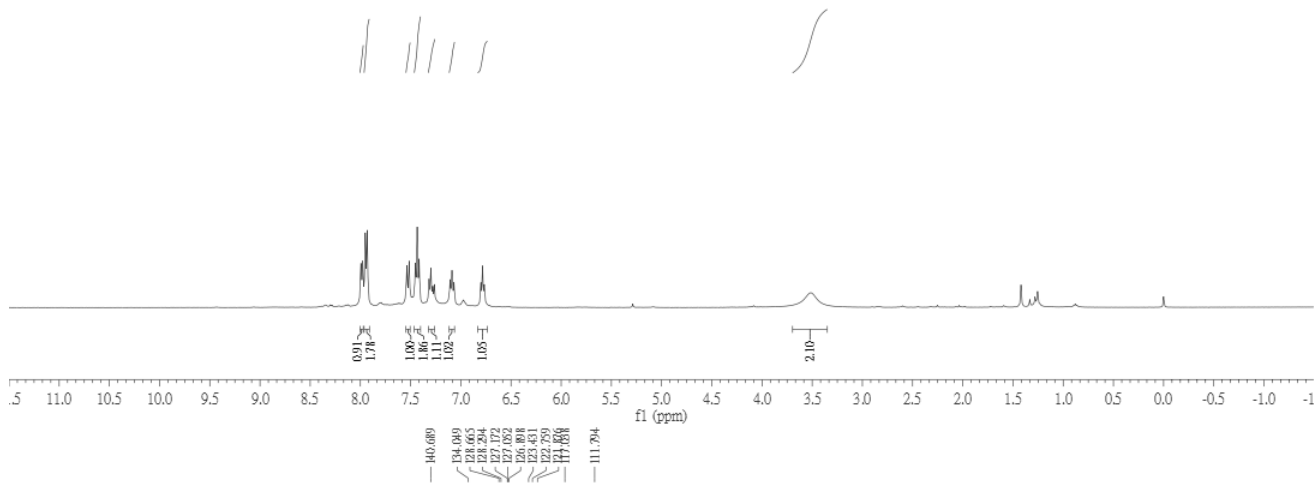

Solvent CDCl<sub>3</sub>  
 Spectrometer Frequency 100.69  
 Nucleus <sup>13</sup>C

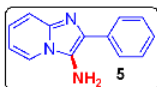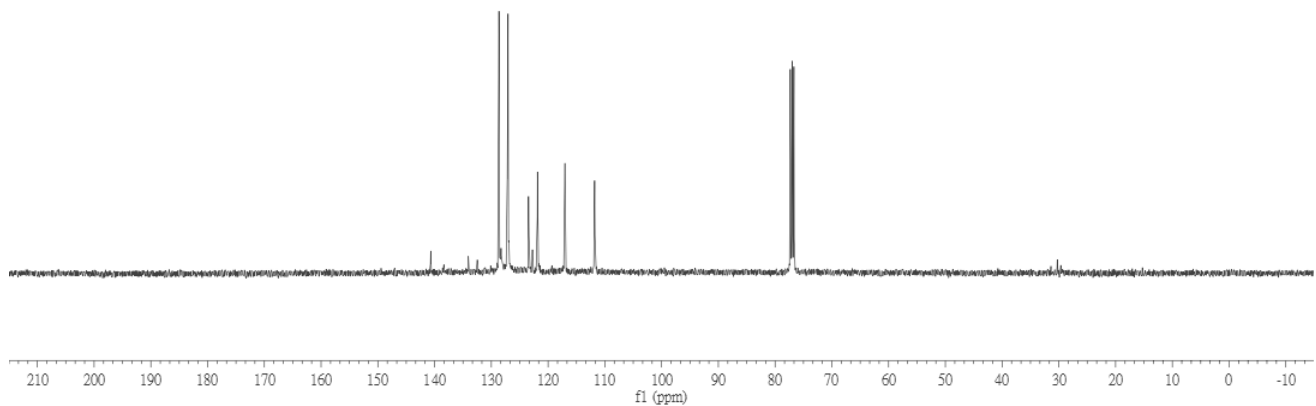

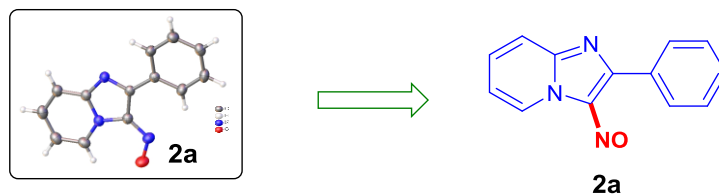

Table 1. Crystal data and structure refinement for **2a**.

|                                   |                                                 |                  |
|-----------------------------------|-------------------------------------------------|------------------|
| Identification code               | <b>2a</b>                                       |                  |
| Empirical formula                 | C <sub>13</sub> H <sub>9</sub> N <sub>3</sub> O |                  |
| Formula weight                    | 223.23                                          |                  |
| Temperature                       | 150(2) K                                        |                  |
| Wavelength                        | 0.71073 Å                                       |                  |
| Crystal system                    | Monoclinic                                      |                  |
| Space group                       | P2 <sub>1</sub> /n                              |                  |
| Unit cell dimensions              | a = 10.8002(6) Å                                | α = 90°.         |
|                                   | b = 8.8240(5) Å                                 | β = 100.264(3)°. |
|                                   | c = 22.0252(13) Å                               | γ = 90°.         |
| Volume                            | 2065.4(2) Å <sup>3</sup>                        |                  |
| Z                                 | 8                                               |                  |
| Density (calculated)              | 1.436 Mg/m <sup>3</sup>                         |                  |
| Absorption coefficient            | 0.095 mm <sup>-1</sup>                          |                  |
| F(000)                            | 928                                             |                  |
| Crystal size                      | 0.530 x 0.290 x 0.200 mm <sup>3</sup>           |                  |
| Theta range for data collection   | 3.041 to 26.394°.                               |                  |
| Index ranges                      | -13 ≤ h ≤ 13, -11 ≤ k ≤ 11, -27 ≤ l ≤ 27        |                  |
| Reflections collected             | 34885                                           |                  |
| Independent reflections           | 4196 [R(int) = 0.0429]                          |                  |
| Completeness to theta = 25.242°   | 99.5 %                                          |                  |
| Absorption correction             | Semi-empirical from equivalents                 |                  |
| Max. and min. transmission        | 0.9281 and 0.8181                               |                  |
| Refinement method                 | Full-matrix least-squares on F <sup>2</sup>     |                  |
| Data / restraints / parameters    | 4196 / 0 / 307                                  |                  |
| Goodness-of-fit on F <sup>2</sup> | 1.067                                           |                  |
| Final R indices [I > 2σ(I)]       | R1 = 0.0398, wR2 = 0.1084                       |                  |
| R indices (all data)              | R1 = 0.0533, wR2 = 0.1221                       |                  |
| Extinction coefficient            | n/a                                             |                  |
| Largest diff. peak and hole       | 0.219 and -0.188 e.Å <sup>-3</sup>              |                  |

Table 2. Atomic coordinates ( $\times 10^4$ ) and equivalent isotropic displacement parameters ( $\text{\AA}^2 \times 10^3$ ) for vsk7.  $U(\text{eq})$  is defined as one third of the trace of the orthogonalized  $U^{ij}$  tensor.

|       | x        | y        | z        | $U(\text{eq})$ |
|-------|----------|----------|----------|----------------|
| O(1)  | 7648(1)  | 4062(1)  | 684(1)   | 39(1)          |
| N(1)  | 4269(1)  | 1023(1)  | 531(1)   | 27(1)          |
| N(2)  | 5388(1)  | 2750(1)  | 90(1)    | 26(1)          |
| N(3)  | 7117(1)  | 3124(2)  | 989(1)   | 32(1)          |
| C(1)  | 4319(1)  | 1858(2)  | 19(1)    | 26(1)          |
| C(2)  | 3459(2)  | 1900(2)  | -535(1)  | 31(1)          |
| C(3)  | 3714(2)  | 2825(2)  | -1000(1) | 35(1)          |
| C(4)  | 4813(2)  | 3714(2)  | -913(1)  | 34(1)          |
| C(5)  | 5646(2)  | 3681(2)  | -370(1)  | 31(1)          |
| C(6)  | 6046(1)  | 2470(2)  | 692(1)   | 27(1)          |
| C(7)  | 5301(1)  | 1382(2)  | 940(1)   | 25(1)          |
| C(8)  | 5545(2)  | 663(2)   | 1553(1)  | 27(1)          |
| C(9)  | 6746(2)  | 608(2)   | 1918(1)  | 32(1)          |
| C(10) | 6923(2)  | -125(2)  | 2486(1)  | 39(1)          |
| C(11) | 5924(2)  | -802(2)  | 2696(1)  | 41(1)          |
| C(12) | 4732(2)  | -744(2)  | 2335(1)  | 40(1)          |
| C(13) | 4540(2)  | -20(2)   | 1768(1)  | 33(1)          |
| O(2)  | 2435(1)  | 3848(1)  | 720(1)   | 39(1)          |
| N(4)  | -880(1)  | 731(1)   | 627(1)   | 26(1)          |
| N(5)  | 173(1)   | 2494(1)  | 168(1)   | 26(1)          |
| N(6)  | 1945(1)  | 2901(2)  | 1037(1)  | 32(1)          |
| C(14) | -866(1)  | 1560(2)  | 108(1)   | 25(1)          |
| C(15) | -1746(2) | 1562(2)  | -439(1)  | 30(1)          |
| C(16) | -1538(2) | 2499(2)  | -908(1)  | 34(1)          |
| C(17) | -458(2)  | 3420(2)  | -838(1)  | 35(1)          |
| C(18) | 398(2)   | 3417(2)  | -304(1)  | 30(1)          |
| C(19) | 854(1)   | 2254(2)  | 767(1)   | 27(1)          |
| C(20) | 149(1)   | 1140(2)  | 1029(1)  | 24(1)          |
| C(21) | 436(1)   | 429(2)   | 1642(1)  | 25(1)          |
| C(22) | 1456(2)  | 859(2)   | 2093(1)  | 31(1)          |
| C(23) | 1680(2)  | 117(2)   | 2660(1)  | 35(1)          |
| C(24) | 915(2)   | -1056(2) | 2783(1)  | 32(1)          |
| C(25) | -93(2)   | -1502(2) | 2336(1)  | 34(1)          |
| C(26) | -331(2)  | -759(2)  | 1773(1)  | 30(1)          |

Table 3. Bond lengths [Å] and angles [°] for vsk7.

---

|              |            |
|--------------|------------|
| O(1)-N(3)    | 1.2665(17) |
| N(1)-C(7)    | 1.3388(19) |
| N(1)-C(1)    | 1.3572(19) |
| N(2)-C(5)    | 1.3725(19) |
| N(2)-C(1)    | 1.3830(19) |
| N(2)-C(6)    | 1.4093(19) |
| N(3)-C(6)    | 1.353(2)   |
| C(1)-C(2)    | 1.395(2)   |
| C(2)-C(3)    | 1.376(2)   |
| C(2)-H(2A)   | 0.9500     |
| C(3)-C(4)    | 1.407(2)   |
| C(3)-H(3B)   | 0.9500     |
| C(4)-C(5)    | 1.363(2)   |
| C(4)-H(4A)   | 0.9500     |
| C(5)-H(5A)   | 0.9500     |
| C(6)-C(7)    | 1.422(2)   |
| C(7)-C(8)    | 1.474(2)   |
| C(8)-C(13)   | 1.395(2)   |
| C(8)-C(9)    | 1.398(2)   |
| C(9)-C(10)   | 1.391(2)   |
| C(9)-H(9A)   | 0.9500     |
| C(10)-C(11)  | 1.383(3)   |
| C(10)-H(10A) | 0.9500     |
| C(11)-C(12)  | 1.389(3)   |
| C(11)-H(11A) | 0.9500     |
| C(12)-C(13)  | 1.386(2)   |
| C(12)-H(12A) | 0.9500     |
| C(13)-H(13A) | 0.9500     |
| O(2)-N(6)    | 1.2643(17) |
| N(4)-C(20)   | 1.3404(19) |
| N(4)-C(14)   | 1.3602(19) |
| N(5)-C(14)   | 1.3795(19) |
| N(5)-C(18)   | 1.3745(19) |
| N(5)-C(19)   | 1.4086(19) |
| N(6)-C(19)   | 1.348(2)   |
| C(14)-C(15)  | 1.394(2)   |
| C(15)-C(16)  | 1.373(2)   |
| C(15)-H(15A) | 0.9500     |
| C(16)-C(17)  | 1.407(2)   |
| C(16)-H(16A) | 0.9500     |
| C(17)-C(18)  | 1.362(2)   |
| C(17)-H(17A) | 0.9500     |
| C(18)-H(18A) | 0.9500     |
| C(19)-C(20)  | 1.427(2)   |
| C(20)-C(21)  | 1.470(2)   |
| C(21)-C(22)  | 1.398(2)   |
| C(21)-C(26)  | 1.398(2)   |
| C(22)-C(23)  | 1.393(2)   |
| C(22)-H(22A) | 0.9500     |
| C(23)-C(24)  | 1.381(2)   |
| C(23)-H(23A) | 0.9500     |
| C(24)-C(25)  | 1.389(2)   |
| C(24)-H(24A) | 0.9500     |

|                    |            |
|--------------------|------------|
| C(25)-C(26)        | 1.386(2)   |
| C(25)-H(25A)       | 0.9500     |
| C(26)-H(26A)       | 0.9500     |
| C(7)-N(1)-C(1)     | 106.18(13) |
| C(5)-N(2)-C(1)     | 122.13(13) |
| C(5)-N(2)-C(6)     | 131.72(14) |
| C(1)-N(2)-C(6)     | 106.15(12) |
| O(1)-N(3)-C(6)     | 116.86(14) |
| N(1)-C(1)-N(2)     | 111.72(13) |
| N(1)-C(1)-C(2)     | 128.48(14) |
| N(2)-C(1)-C(2)     | 119.80(14) |
| C(3)-C(2)-C(1)     | 118.42(15) |
| C(3)-C(2)-H(2A)    | 120.8      |
| C(1)-C(2)-H(2A)    | 120.8      |
| C(2)-C(3)-C(4)     | 120.36(15) |
| C(2)-C(3)-H(3B)    | 119.8      |
| C(4)-C(3)-H(3B)    | 119.8      |
| C(5)-C(4)-C(3)     | 121.13(15) |
| C(5)-C(4)-H(4A)    | 119.4      |
| C(3)-C(4)-H(4A)    | 119.4      |
| C(4)-C(5)-N(2)     | 118.16(15) |
| C(4)-C(5)-H(5A)    | 120.9      |
| N(2)-C(5)-H(5A)    | 120.9      |
| N(3)-C(6)-N(2)     | 128.64(14) |
| N(3)-C(6)-C(7)     | 126.59(14) |
| N(2)-C(6)-C(7)     | 104.71(13) |
| N(1)-C(7)-C(6)     | 111.24(13) |
| N(1)-C(7)-C(8)     | 120.37(14) |
| C(6)-C(7)-C(8)     | 128.39(14) |
| C(13)-C(8)-C(9)    | 119.23(15) |
| C(13)-C(8)-C(7)    | 118.25(14) |
| C(9)-C(8)-C(7)     | 122.50(14) |
| C(8)-C(9)-C(10)    | 119.83(16) |
| C(8)-C(9)-H(9A)    | 120.1      |
| C(10)-C(9)-H(9A)   | 120.1      |
| C(11)-C(10)-C(9)   | 120.72(16) |
| C(11)-C(10)-H(10A) | 119.6      |
| C(9)-C(10)-H(10A)  | 119.6      |
| C(10)-C(11)-C(12)  | 119.47(16) |
| C(10)-C(11)-H(11A) | 120.3      |
| C(12)-C(11)-H(11A) | 120.3      |
| C(11)-C(12)-C(13)  | 120.45(17) |
| C(11)-C(12)-H(12A) | 119.8      |
| C(13)-C(12)-H(12A) | 119.8      |
| C(8)-C(13)-C(12)   | 120.29(16) |
| C(8)-C(13)-H(13A)  | 119.9      |
| C(12)-C(13)-H(13A) | 119.9      |
| C(20)-N(4)-C(14)   | 106.17(12) |
| C(14)-N(5)-C(18)   | 122.16(13) |
| C(14)-N(5)-C(19)   | 106.26(12) |
| C(18)-N(5)-C(19)   | 131.58(14) |
| O(2)-N(6)-C(19)    | 117.05(14) |
| N(4)-C(14)-N(5)    | 111.81(13) |
| N(4)-C(14)-C(15)   | 128.23(14) |
| N(5)-C(14)-C(15)   | 119.97(14) |

|                    |            |
|--------------------|------------|
| C(16)-C(15)-C(14)  | 118.23(15) |
| C(16)-C(15)-H(15A) | 120.9      |
| C(14)-C(15)-H(15A) | 120.9      |
| C(15)-C(16)-C(17)  | 120.58(15) |
| C(15)-C(16)-H(16A) | 119.7      |
| C(17)-C(16)-H(16A) | 119.7      |
| C(18)-C(17)-C(16)  | 121.03(15) |
| C(18)-C(17)-H(17A) | 119.5      |
| C(16)-C(17)-H(17A) | 119.5      |
| C(17)-C(18)-N(5)   | 118.01(15) |
| C(17)-C(18)-H(18A) | 121.0      |
| N(5)-C(18)-H(18A)  | 121.0      |
| N(6)-C(19)-N(5)    | 128.29(14) |
| N(6)-C(19)-C(20)   | 126.93(14) |
| N(5)-C(19)-C(20)   | 104.77(13) |
| N(4)-C(20)-C(19)   | 110.99(13) |
| N(4)-C(20)-C(21)   | 120.36(13) |
| C(19)-C(20)-C(21)  | 128.63(14) |
| C(22)-C(21)-C(26)  | 118.51(14) |
| C(22)-C(21)-C(20)  | 123.18(14) |
| C(26)-C(21)-C(20)  | 118.30(14) |
| C(21)-C(22)-C(23)  | 119.94(15) |
| C(21)-C(22)-H(22A) | 120.0      |
| C(23)-C(22)-H(22A) | 120.0      |
| C(24)-C(23)-C(22)  | 120.92(15) |
| C(24)-C(23)-H(23A) | 119.5      |
| C(22)-C(23)-H(23A) | 119.5      |
| C(23)-C(24)-C(25)  | 119.59(15) |
| C(23)-C(24)-H(24A) | 120.2      |
| C(25)-C(24)-H(24A) | 120.2      |
| C(26)-C(25)-C(24)  | 119.84(16) |
| C(26)-C(25)-H(25A) | 120.1      |
| C(24)-C(25)-H(25A) | 120.1      |
| C(25)-C(26)-C(21)  | 121.19(15) |
| C(25)-C(26)-H(26A) | 119.4      |
| C(21)-C(26)-H(26A) | 119.4      |

---

Symmetry transformations used to generate equivalent atoms:



Table 4. Anisotropic displacement parameters ( $\text{\AA}^2 \times 10^3$ ) for vsk7. The anisotropic displacement factor exponent takes the form:  $-2\pi^2[ h^2 a^{*2}U^{11} + \dots + 2 h k a^* b^* U^{12} ]$

|       | U <sup>11</sup> | U <sup>22</sup> | U <sup>33</sup> | U <sup>23</sup> | U <sup>13</sup> | U <sup>12</sup> |
|-------|-----------------|-----------------|-----------------|-----------------|-----------------|-----------------|
| O(1)  | 38(1)           | 32(1)           | 48(1)           | -2(1)           | 10(1)           | -10(1)          |
| N(1)  | 29(1)           | 25(1)           | 26(1)           | -1(1)           | 3(1)            | 1(1)            |
| N(2)  | 30(1)           | 22(1)           | 28(1)           | -2(1)           | 6(1)            | 2(1)            |
| N(3)  | 31(1)           | 26(1)           | 39(1)           | -5(1)           | 6(1)            | -4(1)           |
| C(1)  | 28(1)           | 21(1)           | 29(1)           | -3(1)           | 6(1)            | 2(1)            |
| C(2)  | 33(1)           | 27(1)           | 31(1)           | -2(1)           | 3(1)            | 2(1)            |
| C(3)  | 42(1)           | 31(1)           | 30(1)           | -1(1)           | 2(1)            | 6(1)            |
| C(4)  | 46(1)           | 28(1)           | 30(1)           | 3(1)            | 12(1)           | 4(1)            |
| C(5)  | 38(1)           | 24(1)           | 33(1)           | 1(1)            | 13(1)           | 1(1)            |
| C(6)  | 28(1)           | 24(1)           | 27(1)           | -4(1)           | 4(1)            | 2(1)            |
| C(7)  | 28(1)           | 21(1)           | 27(1)           | -4(1)           | 5(1)            | 3(1)            |
| C(8)  | 32(1)           | 23(1)           | 26(1)           | -3(1)           | 4(1)            | 3(1)            |
| C(9)  | 31(1)           | 32(1)           | 33(1)           | -3(1)           | 4(1)            | 3(1)            |
| C(10) | 38(1)           | 41(1)           | 34(1)           | -1(1)           | -2(1)           | 10(1)           |
| C(11) | 50(1)           | 39(1)           | 33(1)           | 7(1)            | 5(1)            | 10(1)           |
| C(12) | 45(1)           | 38(1)           | 39(1)           | 8(1)            | 10(1)           | 0(1)            |
| C(13) | 34(1)           | 31(1)           | 32(1)           | 1(1)            | 2(1)            | -1(1)           |
| O(2)  | 38(1)           | 34(1)           | 46(1)           | 6(1)            | 7(1)            | -10(1)          |
| N(4)  | 27(1)           | 25(1)           | 26(1)           | -1(1)           | 3(1)            | 1(1)            |
| N(5)  | 29(1)           | 23(1)           | 27(1)           | -1(1)           | 5(1)            | 2(1)            |
| N(6)  | 31(1)           | 28(1)           | 38(1)           | 0(1)            | 5(1)            | -5(1)           |
| C(14) | 27(1)           | 22(1)           | 28(1)           | -3(1)           | 5(1)            | 2(1)            |
| C(15) | 31(1)           | 28(1)           | 29(1)           | -1(1)           | 4(1)            | 4(1)            |
| C(16) | 39(1)           | 33(1)           | 29(1)           | 0(1)            | 1(1)            | 8(1)            |
| C(17) | 45(1)           | 30(1)           | 31(1)           | 4(1)            | 9(1)            | 4(1)            |
| C(18) | 37(1)           | 24(1)           | 33(1)           | 2(1)            | 12(1)           | 1(1)            |
| C(19) | 28(1)           | 24(1)           | 28(1)           | -1(1)           | 4(1)            | 2(1)            |
| C(20) | 25(1)           | 22(1)           | 26(1)           | -3(1)           | 6(1)            | 3(1)            |
| C(21) | 26(1)           | 23(1)           | 26(1)           | -1(1)           | 6(1)            | 4(1)            |
| C(22) | 33(1)           | 27(1)           | 32(1)           | -4(1)           | 1(1)            | -3(1)           |
| C(23) | 37(1)           | 36(1)           | 29(1)           | -5(1)           | -3(1)           | 1(1)            |
| C(24) | 38(1)           | 33(1)           | 26(1)           | 3(1)            | 5(1)            | 8(1)            |
| C(25) | 34(1)           | 36(1)           | 33(1)           | 6(1)            | 6(1)            | 0(1)            |
| C(26) | 27(1)           | 33(1)           | 30(1)           | 1(1)            | 2(1)            | -2(1)           |

Table 5. Hydrogen coordinates ( $\times 10^4$ ) and isotropic displacement parameters ( $\text{\AA}^2 \times 10^{-3}$ ) for vsk7.

|        | x     | y     | z     | U(eq) |
|--------|-------|-------|-------|-------|
| H(2A)  | 2715  | 1304  | -589  | 37    |
| H(3B)  | 3145  | 2864  | -1382 | 42    |
| H(4A)  | 4976  | 4349  | -1238 | 41    |
| H(5A)  | 6386  | 4286  | -312  | 37    |
| H(9A)  | 7438  | 1069  | 1777  | 39    |
| H(10A) | 7740  | -160  | 2732  | 47    |
| H(11A) | 6053  | -1304 | 3084  | 49    |
| H(12A) | 4042  | -1204 | 2478  | 48    |
| H(13A) | 3721  | 13    | 1524  | 39    |
| H(15A) | -2469 | 931   | -485  | 36    |
| H(16A) | -2130 | 2527  | -1283 | 41    |
| H(17A) | -325  | 4053  | -1169 | 42    |
| H(18A) | 1130  | 4034  | -258  | 37    |
| H(22A) | 1995  | 1657  | 2013  | 37    |
| H(23A) | 2370  | 421   | 2966  | 42    |
| H(24A) | 1077  | -1554 | 3172  | 39    |
| H(25A) | -619  | -2315 | 2416  | 41    |
| H(26A) | -1027 | -1063 | 1471  | 36    |
